# Supplementary material for: Single-nucleus chromatin accessibility profiling highlights distinct astrocyte signatures in progressive supranuclear palsy and corticobasal degeneration
Source: PubMed Central journal article supplement (PMC9468099; doi:10.1007/s00401-022-02483-8), 2022-08-17
Supplement: 401_2022_2483_MOESM2_ESM.pdf [file 401_2022_2483_MOESM2_ESM.pdf]

1

2

3

4

5

6

**Single-Nucleus Chromatin Accessibility Profiling  
Highlights Distinct Astrocyte Signatures in  
Progressive Supranuclear Palsy and  
Corticobasal Degeneration**

8

9

10

11

12

Nils Briel, Viktoria C Ruf, Katrin Pratsch, Sigrun Roeber, Jeannine Widmann,  
Janina Mielke, Mario M Dorostkar, Otto Windl, Thomas Arzberger,  
Jochen Herms\*, Felix L Struebing\*

13

14

15

16

\* These authors contributed equally

17

18

**- Supplemental Methods -**

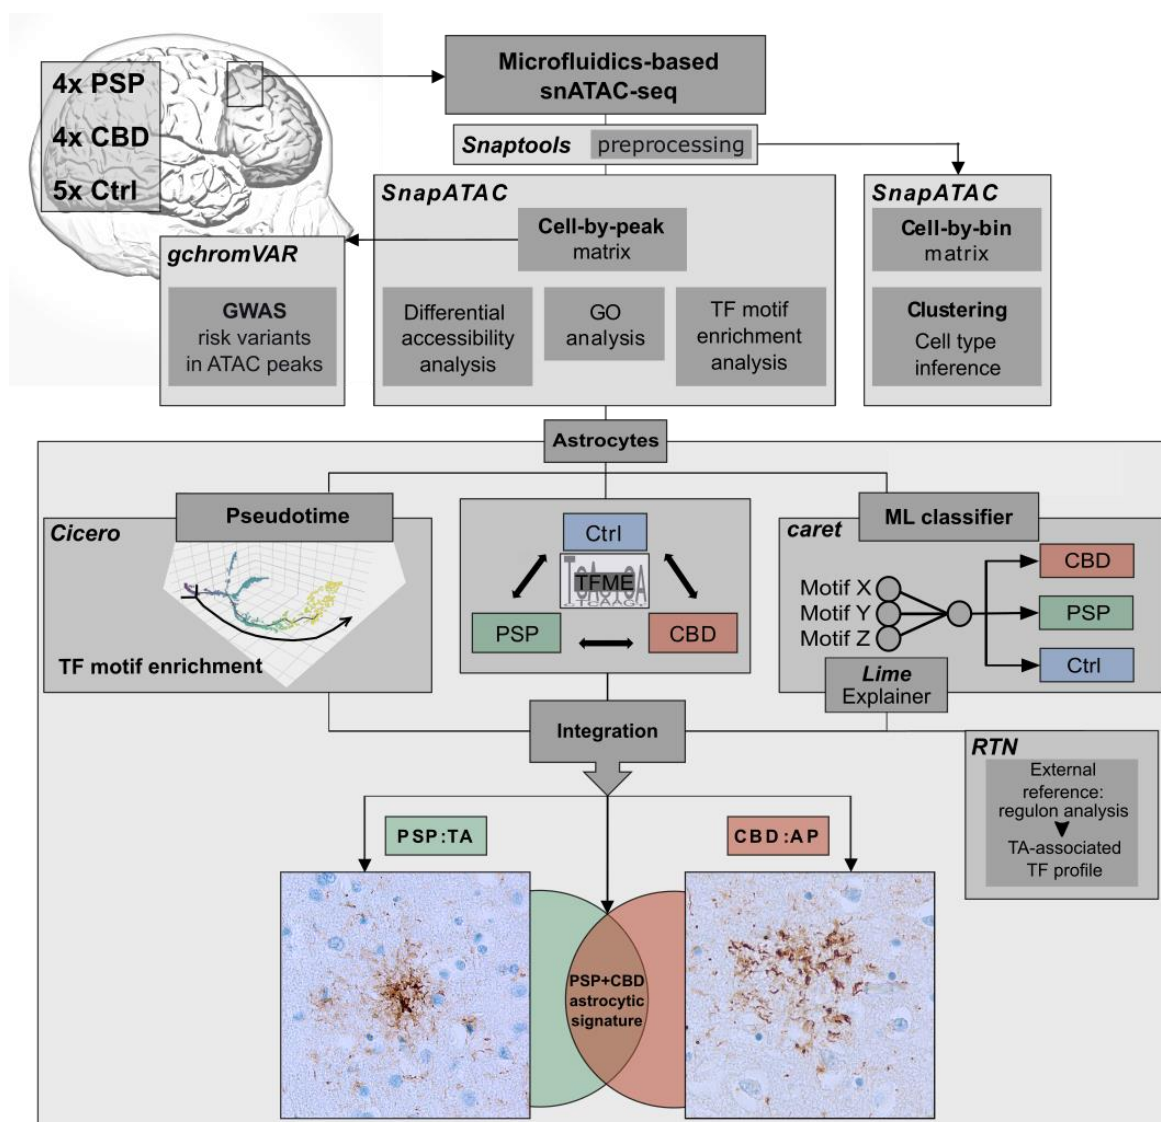

19 **Supplemental Methods Fig.1** Comprehensive bioinformatical analysis flow diagram.

20 SnATAC-sequencing was applied to cryopreserved frontal cortex samples from deceased  
 21 PSP, CBD, and Ctrl individuals. Raw sequencing reads were preprocessed with *Snaptools*  
 22 and *SnapATAC*. The resulting matrices were then used (i) for graph-based clustering and  
 23 cell type inference (using a binned genome), and (ii) for peak-calling, GO, and TF-motif  
 24 analysis (using the peak matrix). Furthermore, the peak matrix was subjected to GWAS risk  
 25 variant-association with cell types.

26 Downstream, only the astrocytic cluster was investigated (boxed lower part) to find altered  
 27 TF motif enrichment (TFME) in pairwise comparisons (mid panel), TFME changes along  
 28 pseudotime trajectories (left), and to train an ML-based disease classifier (right). Finally,  
 29 significant results from all these three branches were integrated, and refined by a TA-  
 30 associated TF profile extracted from an external dataset, to define either a general  
 31 astrocytic tauopathy TF signature, or entity-specific astrocytic TF signatures. These  
 32 signatures were presumed to mirror the neuropathological context of characteristic pTau  
 33 inclusions in astrocytes, namely TA in PSP and AP in CBD. Names of algorithms employed  
 34 in this analysis are given in ***bold italic*** in the upper left corner of each panel.

35 **Abbreviations:** AP, astrocytic plaque; GO, gene ontology; GWAS, genome wide  
 36 association studies; ML, machine learning; pTau; hyperphosphorylated Tau; RTN,  
 37 Reconstruction of Transcriptional Networks; TA, tufted astrocyte; TFME, transcription factor  
 38 motif enrichment.

## 39 **Analysis of snATAC-seq data**

### 40 **snATAC-seq data pre-processing, peak calling, and peak matrix construction**

41 Raw sequencing reads in \*.bcl-format were de-multiplexed into \*.fastq using the 10x  
42 Genomics™ *cellranger-atac-1.2.0* software with *cellranger-atac mkfastq*.  
43 Subsequently, *cellranger-atac count* was executed on single-sample fastq-files to  
44 generate general QC metrics and sequence alignment maps in \*.bam format according to  
45 the reference data (10x Genomics-indexed genome hg19/GRCh37.87 (hg19),  
46 <https://cf.10xgenomics.com/supp/cell-atac/refdata-cellranger-atac-hg19-1.2.0.tar.gz>). The  
47 *cellranger-atac* output allowed a primary QC of each sample regarding sequencing  
48 metrics, included cells, insert sizes, targeting metrics, and library complexity.

49 Next, these quality assessment values were set to define exclusion criteria for single  
50 barcode (assigned cell)-fragment vectors, so that only those barcoded cells remained,  
51 whose fragments reached a mapping quality score (MAPQ) of at least 30, did not exceed  
52 the length of 1000 bp, had a coverage of at least 500, and which satisfied correctly paired  
53 ends on the basis of alignment flags. Incorporating these QC parameters, the *snaptools*  
54 *snap-pre* function [1] generated a *Single-Nucleus Accessibility Profiles* file (.snap). After  
55 generating a cell-by-bin matrix with *snaptools snap-add-bmat* (window size: 1000 bp)  
56 within each snap-file, downstream analysis was continued in an RStudio Server/R3.6  
57 environment by importing and instantiating the <sample>.snap objects. A final QC measure  
58 followed to restrict the inclusion in terms of unique fragment counts ( $3 \leq \text{UMI} \leq 6$ ) and  
59 fragments/promoter ratio ( $.1 \leq \text{ratio} \leq .7$ ).

### 60 **SnapATAC: quality control, clustering, and cell type identification**

61 We utilized the R package *SnapATAC* [2] to perform matrix binarization, clustering,  
62 differential accessibility, GO, and TFM analysis on the preprocessed snATAC-seq data.  
63 Single sample datasets were preprocessing before merging into a single, all samples  
64 comprising snap-file, followed by downstream matrix manipulation. Therefore, the entire  
65 genome was binned into 1000 bp-large segments and binary normalized, which had been  
66 shown to biologically and computationally improve clustering performance [3]. Fragments  
67 overlapping with regions present in the ENCODE blacklist [4] or the mitochondrial  
68 chromosome, or which represented the top 5% bins at transcription start sites were  
69 excluded, since those could systematically compromise subsequent steps. Dimensionality  
70 reduction and feature extraction was conducted by applying the diffusion maps algorithm in  
71 combination with *Nyström* density-based sampling (because of large sample sizes).  
72 Significant components were determined *ad hoc* and set as eigen dimensions in k-nearest

73 neighbor clustering (kNN,  $k = 15$ , eigen dimensions = 1 to 25, *Euclidean* distance, resolution  
74 = 1). This graph-based approach was guided by the *Leiden* algorithm to find optimally  
75 connected communities/clusters [5]. The resulting cluster number showed a robust gap  
76 statistic of 0.943, when applied to a subset of 1,000 barcodes/cells and the top 3 quartiles  
77 of accessibility bins in a *post hoc* cluster validation (Suppl.Fig.1). This parameter describes  
78 the deviation of intra-cluster variation at different cluster sizes  $k$  from a randomly distributed  
79 reference data set and should be maximized. Subset size was determined by visual cluster  
80 purity, choosing the minimum cell number that resulted in overlapping cluster assignments  
81 (1,000 cells, Suppl.Fig.1). Downscaling was necessary due to the algorithm's computing  
82 capacity. Barcodes were then embedded in two-dimensional (2D) space using uniform  
83 manifold approximation and projection (UMAP). Batch effects were levelled out by *harmony*  
84 [6] accounting for the assigned case identifiers (IDs) in the first 25 eigen dimensions. Thus,  
85 main technical confounders showed no specific enrichment within single clusters  
86 (Suppl.Fig.2A&B). In a sample-specific evaluation, sequencing, and biological covariates  
87 (e.g., unmapped reads, duplicate likelihood, low MAPQ, and promoter ratio, mitochondrial  
88 reads, blacklist region fragments) showed high correlations, but not with epidemiological  
89 covariates (age at death, PMI) (Suppl.Fig.2D).

90 GA scores were calculated in *SnapATAC* and utilized to identify cluster-wise cell type  
91 identities. Reference marker genes for brain cell types were included from McKenzie et al.  
92 [7] and Lake et al. [8], and are provided with Suppl.Data01,T01. Visual inspection of  
93 projected GA scores on cells in UMAP guided cell type assignments (Suppl.Fig.3&4).

#### 94 **SnapATAC: Peak calling, GO, and TFM analysis**

95 For peak calling, reads from cells of the same cluster ( $n > 100$  cells) were aggregated first.  
96 Then, peaks were extracted for each cluster individually with MACS2, given the options --  
97 nomodel --shift 75 --ext 150 --qval 5e-2 -B --SPMR. Considering this cluster-  
98 wise peak-matrix as reference, the cell-by-peak matrix (*pmat*) was deduced from the  
99 merged peaks and the binarized matrix (*bmat*).

100 To identify differentially accessible peaks among clusters, a kNN-based approach was  
101 followed, which accounted for a reference background to compare with in the local graph  
102 environment. Using *SnapATAC*'s implementation of *edgeR*'s (v3.18.1) differential analysis  
103 scoring, *Benjamini-Hochberg* (*BH*)-corrected p-values were read out for a biological  
104 coefficient of variation of 0.25 to identify differentially accessible regions (DARs). DARs in  
105 smaller clusters ( $n \leq 100$  cells) were detected for the top 2,000 peaks in a rank-based  
106 enrichment metric. Next, *chromVAR-motif* [9] was used to compute TFME from the peaks-

107 input in the *pmat*, which resulted in a motif matrix (*mmat*; ref. genome hg19, minimum cells  
108 per peak = 10). With this approach, we found a total of 373,957 peaks and 386 TFMs.

109 The *rGREAT* package [10] was applied on the DARs of each cluster to obtain GO term  
110 enrichment for molecular function (MF), biological process (BP), and cellular compartment  
111 (CC). *BH*-corrected p-value statements and corresponding binomial enrichment values  
112 were reported, as indicated in the figures.

### 113 **Astrocyte sub-clusters: Co-accessibility, pseudotime inference and TFME tracing**

114 To regress peak co-accessibility and to delineate single-nucleus accessibility pseudotime  
115 trajectories in astrocytes, we deployed the updated *Cicero* [11,12] version developed with  
116 *Monocle3*.

117 First, a *CellDataSet* (*cds*) was created given the barcode vector and *pmat* from the  
118 astrocytes snap object. Then we followed single steps as described in the version-specific  
119 vignette of *Cicero* [12]. Briefly, we preprocessed the *cds* using principal component analysis  
120 (PCA) to obtain a reduced dimensionality of 50 (default) and regressed out batch effects  
121 with `align_cds`, taking the case IDs as covariate. Cells were embedded in 2D with UMAP  
122 and astrocytic subclusters detected with k-means clustering.

123 For single-cell trajectory construction, functions from *Cicero/Monocle3* to learn a trajectory  
124 graph was applied to a re-processed *cds* in UMAP for each disease entity separately, but  
125 while including Ctrl astrocytes as biological reference and origin of the trajectory. Root  
126 ('origin') cells were defined as the population with the highest TFME for EMX2, a  
127 developmentally early, astrocytic TF [13]. Epigenetic changes of TFME and GA along  
128 pseudotime were modeled separately using *tradeSeq's* [14] `fitGAM` function for each  
129 disease-specific trajectory. Differences regarding start to end feature values and lineage  
130 associations were statistically tested with *Wald*-test-based functions.

131 In order to discretize pseudotime steps, as depicted in Suppl.Fig.11, all cells were  
132 partitioned to one of 5 equally sized pseudotime bins. TFME scores were pairwise  
133 compared across those bins, where the first one was set as reference (*Wilcoxon* rank-sum  
134 test).

### 135 **Astrocytes sub-clusters: GO analysis and TFME comparisons**

136 GO assessment was applied on the UMAP embedding of astrocytes obtained from the  
137 previous *Cicero*-based dimensionality reduction. GO analysis of TF proteins was  
138 conducted with *pathfindR*. Binomial testing enrichment and p-values with *BH*-correction  
139 were reported. The same tool was used for analyzing relations of terms and proteins in the

140 bubble-connections graphs. To identify significant differences of active TFs between the  
141 three disease groups, pairwise comparisons of TFME medians was conducted, using a  
142 *Wilcoxon* rank-sum test and the *BH* method for multiple hypothesis correction.

143 Quantification of protein degradation changes or microglial activation was enabled by the  
144 *amiGO2* database (<http://amigo.geneontology.org/amigo/search/bioentity>) filtered for the  
145 terms ‘chaperon-mediated autophagy’ (CMA), ubiquitin-proteasome-system (UPS), and  
146 unfolded-protein-response (UPR) or ‘microglial cell activation’ in *Homo sapiens*. Gene lists  
147 were downloaded March 7<sup>th</sup>, or June 10<sup>th</sup>, 2021, respectively, and subjected to *SnapATAC*’s  
148 GA calculation. Then, disease- and cell type-wise mean GA values (of genes associated  
149 with one of these gene lists) were calculated for statistical comparison (*Welch* t-test).

### 150 **Modeling TF states, analyzing branch intersections and triangle plots**

151 To train machine learning classifiers, the astrocyte TFME matrix was first split into a train  
152 (80% of cells) and test (20% of cells) set. Then a decision tree-based modeling algorithm  
153 (extreme gradient boosting tree, XGB) was fit to the train set with a 3 times repeated 10-  
154 fold cross validation control strategy in *caret* [15]. Predictive performance was measured on  
155 the test set in terms of overall accuracy and *Cohen’s kappa* as chance-corrected agreement  
156 measure in categorical problems [16]. The ML model explanation framework *Lime* [17] was  
157 used to learn an interpretable representation of the complex XGB by fitting multiple local  
158 linear models to the permuted predictions of the original model. Extracted feature weights  
159 from these simpler models were considered to describe the importance of each feature,  
160 namely TFMs, in favoring one of the group entities.

161 To determine the intersections of TFs associated with either the trajectory changes, a  
162 disease group in the triangular comparison, the model’s feature importance, or with the  
163 appearance of TAs in PSP, upset plots were constructed with *UpSetR* [18].

164 Triangle plots were considered to extend volcano plots in differentiating a grouping identity  
165 against feature scores. In this approach, two columns ( $C$ ,  $C_{ref}$ ) of the same feature ( $f$ ) were  
166 stratified by disease entity ( $i$ ) and their medians statistically evaluated against each other,  
167 where  $C_{ref}$  was the median of the respective Ctrl subset (*Wilcoxon* rank-sum test, *BH*  
168 correction). Then the extent of absolute difference of medians between  $C_{i,f}$  and  $C_{ref\ i,f}$  was  
169 depicted as symbol size and the respective negative decadic logarithm of p-values was  
170 indicated as color code. The tips of the triangles finally show the direction of value change  
171 in the comparison of interest.

## 172 **gchromVAR: risk variant enrichment analysis in snATAC-seq data**

173 We used *gchromVAR* [19,20] to assess single nucleus-resolved GWAS risk variant  
174 enrichment in the chromatin accessibility data set comprising all identified cell types and  
175 following the *gchromVAR\_vignette.Rmd*. GWAS summary statistics for PSP  
176 (Orphanet\_683), CBD (Orphanet\_278), FTD (Orphanet\_282), AD (EFO\_0000249), PD  
177 (EFO\_0002508), MSA (EFO\_1001050), LBD (EFO\_0006792), and ALS (EFO\_0000253)  
178 were downloaded from the EBI-GWAS catalogue [21] January 7<sup>th</sup>, 2021. We used a *pmat*  
179 derivative depicting cluster- or cell type-wise peak sums from the previously assigned *snat*  
180 object and discarded empty or unmapped peak columns. Together with the genomic peak  
181 description table, a *RangedSummarizedExperiment* object was created. Then, GC bias was  
182 added, a measure introduced by the developers of *chromVAR* to account for background  
183 properties in the hg19 reference genome. By finding overlaps of the peak distributions in  
184 the dataset with risk variant annotations in the summary statistics, *gchromVAR* implements  
185 ‘weighted deviations’ as z-scores to evaluate the extent of cell type-specific enrichment and  
186 provides *Bonferroni*-corrected p-values.

## 187 **Analysis of transcriptional regulatory networks in PSP**

188 Processed phenotype-gene expression regression data from bulkRNA-seq in temporal  
189 cortices (TCX) of PSP brains [22] were downloaded from  
190 <https://link.springer.com/article/10.1007%2Fs00401-018-1900-5#SupplementaryMaterial>  
191 (Table 04, Excel-file). Subject covariates with the accession doi:10.7303/syn3817650.5, as  
192 well as normalized gene-mapped read counts with the accession  
193 doi:10.7303/syn3607513.1 (MayoRNA-seq-Pilot PSP TCX) and doi:10.7303/syn4650265.4  
194 (MayoRNA-seq PSP TCX) were downloaded from the AMP-AD knowledge portal. During  
195 pre-processing of the primary data, 25,937 single transcripts from the MayoRNAseq Study  
196 [23] could be assigned to a total of 14,056 annotated *Ensembl* gene IDs using the hg19  
197 reference genome. Based on a consensus list of 1,590 human TFs [24], 1,097 TFs could  
198 be identified by their *Ensembl* IDs in the underlying expression data set. For network  
199 inference, only the PSP cohorts comprising 176 samples were used.

200 For the *Reconstruction of Transcriptional Regulatory Networks*, input parameters were  
201 defined as follows: a named normalized gene expression matrix (*gexp*, n=176 PSP cases),  
202 a named character vector with gene identification codes of all human TFs [24], and a matrix  
203 with annotations to all matched gene identification codes (Illumina\_ID; Ensemble Gene\_ID,  
204 hg19 H. sapiens, v86; ‘Symbol’). The mutual information, a weighting of the interaction of  
205 each TF with all its possible target genes, was calculated from the *gexp*. After permutation

206 (n = 1000, p-cut-off =  $3.21^{-7}$ ) and bootstrapping, only robust regulon edges (corresponding  
 207 to a TF-target gene connection) were retained. The established transcriptional network  
 208 (*tnet*) comprised regulons and their binary inner single connection weighting (positive vs.  
 209 negative).

210 To assess regulon associations with phenotypic hallmarks in PSP, a numerical vector was  
 211 included with gene-specific coefficients resulting from *Pearson* correlation between  
 212 expression and neuropathological latent trait residual values representing the  
 213 semiquantitative TA levels of PSP brains [22]. Using gene-set enrichment analysis (GSEA)  
 214 with the *Pearson* coefficient and significant differentially expressed genes (DEG; adj.p-value  
 215  $\leq .05$ ), we obtained an enrichment score that reflected the accumulation of phenotype-  
 216 attributed DEGs in the inferred regulons. Resulting phenotype-associated regulons were  
 217 filtered for their statistical significance in the comparison of regulon activities between PSP  
 218 and Ctrl samples from the Allen *et al.* data set. Only those regulons with a *BH*-corrected p  
 219  $\leq .05$  in GSEA-1T and with a *Bonferroni*-corrected  $p < .05$  in the PSP vs. Ctrl comparison of  
 220 regulon activities were considered in downstream analysis parts.

221

## 222 **References**

- 223 1. GitHub - r3fang/SnapTools: A module for working with snap files in Python [Internet]. [cited  
 224 2021 Mar 14]. Available from: <https://github.com/r3fang/SnapTools>
- 225 2. Fang R, Preissl S, Li Y, Hou X, Lucero J, Wang X, et al. Comprehensive analysis of single  
 226 cell ATAC-seq data with SnapATAC. *Nat Commun.* 2021 Dec 1;12(1):1–15.
- 227 3. Chen H, Lareau C, Andreani T, Vinyard ME, Garcia SP, Clement K, et al. Assessment of  
 228 computational methods for the analysis of single-cell ATAC-seq data. 2019;
- 229 4. Amemiya HM, Kundaje A, Boyle AP. The ENCODE Blacklist: Identification of Problematic  
 230 Regions of the Genome. *Sci Rep.* 2019 Dec 1;9(1):1–5.
- 231 5. Traag VA, Waltman L, van Eck NJ. From Louvain to Leiden: guaranteeing well-connected  
 232 communities. *Sci Rep.* 2019 Dec 1;9(1):1–12.
- 233 6. Korsunsky I, Millard N, Fan J, Slowikowski K, Zhang F, Wei K, et al. Fast, sensitive and  
 234 accurate integration of single-cell data with Harmony. *Nat Methods.* 2019 Dec 1;16(12):1289–  
 235 96.
- 236 7. McKenzie AT, Wang M, Hauberg ME, Fullard JF, Kozlenkov A, Keenan A, et al. Brain Cell  
 237 Type Specific Gene Expression and Co-expression Network Architectures. *Sci Rep.* 2018  
 238 Dec 11;8(1):8868.



- 239 8. Lake BB, Ai R, Kaeser GE, Salathia NS, Yung YC, Liu R, et al. Neuronal subtypes and  
240 diversity revealed by single-nucleus RNA sequencing of the human brain. *Science*. 2016 Jun  
241 24;352(6293):1586–90.
- 242 9. Schep AN, Wu B, Buenrostro JD, Greenleaf WJ. ChromVAR: Inferring transcription-factor-  
243 associated accessibility from single-cell epigenomic data. *Nat Methods*. 2017 Oct  
244 1;14(10):975–8.
- 245 10. Bioconductor - rGREAT [Internet]. [cited 2021 Jan 19]. Available from:  
246 <http://bioconductor.org/packages/release/bioc/html/rGREAT.html>
- 247 11. Pliner HA, Packer JS, McFaline-Figueroa JL, Cusanovich DA, Daza RM, Aghamirzaie D, et  
248 al. Cicero Predicts cis-Regulatory DNA Interactions from Single-Cell Chromatin Accessibility  
249 Data. *Mol Cell*. 2018 Sep 6;71(5):858-871.e8.
- 250 12. Pilner H. Package “cicero.” 2020.
- 251 13. Tiwari N, Pataskar A, Pé S, Ló Pez-Mascaraque L, Tiwari VK, Correspondence BB. Stage-  
252 Specific Transcription Factors Drive Astroglialogenesis by Remodeling Gene Regulatory  
253 Landscapes. *Stem Cell*. 2018;23:557-571.e8.
- 254 14. Van den Berge K, Roux de Bézieux H, Street K, Saelens W, Cannoodt R, Saeys Y, et al.  
255 Trajectory-based differential expression analysis for single-cell sequencing data. *Nat*  
256 *Commun*. 2020;11(1):1–13.
- 257 15. Kuhn M. *Journal of Statistical Software Building Predictive Models in R Using the caret*  
258 *Package*. 2008.
- 259 16. Cohen J. A Coefficient of Agreement for Nominal Scales. *Educ Psychol Meas*. 1960 Jul  
260 2;20(1):37–46.
- 261 17. Ribeiro MT, Singh S, Guestrin C. “Why should i trust you?” Explaining the predictions of any  
262 classifier. In: *Proceedings of the ACM SIGKDD International Conference on Knowledge*  
263 *Discovery and Data Mining*. Association for Computing Machinery; 2016. p. 1135–44.
- 264 18. Conway JR, Lex A, Gehlenborg N. UpSetR: an R package for the visualization of intersecting  
265 sets and their properties. Hancock J, editor. *Bioinformatics*. 2017 Sep 15;33(18):2938–40.
- 266 19. Ulirsch JC, Lareau CA, Bao EL, Ludwig LS, Guo MH, Benner C, et al. Interrogation of human  
267 hematopoiesis at single-cell and single-variant resolution. *Nat Genet*. 2019 Apr 11;51(4):683–  
268 93.
- 269 20. caleblareau/gchromVAR: Cell type specific enrichments using finemapped variants and  
270 quantitative epigenetic data [Internet]. [cited 2020 Apr 3]. Available from:  
271 <https://github.com/caleblareau/gchromVAR>
- 272 21. MacArthur J, Bowler E, Cerezo M, Gil L, Hall P, Hastings E, et al. The new NHGRI-EBI

- 273 Catalog of published genome-wide association studies (GWAS Catalog). *Nucleic Acids Res.*  
274 2017 Jan 1;45(D1):D896–901.
- 275 22. Allen M, Wang X, Serie DJ, Strickland SL, Burgess JD, Koga S, et al. Divergent brain gene  
276 expression patterns associate with distinct cell-specific tau neuropathology traits in  
277 progressive supranuclear palsy. *Acta Neuropathol.* 2018 Nov 22;136(5):709–27.
- 278 23. Allen M, Carrasquillo MM, Funk C, Heavner BD, Zou F, Younkin CS, et al. Data Descriptor:  
279 Human whole genome genotype and transcriptome data for Alzheimer’s and other  
280 neurodegenerative diseases. 2016;
- 281 24. Vaquerizas JM, Kummerfeld SK, Teichmann SA, Luscombe NM. A census of human  
282 transcription factors: Function, expression and evolution. *Nat Rev Genet.* 2009;10(4):252–63.

## 283 1. Abbreviations

| Abbreviation | Term                                                        |
|--------------|-------------------------------------------------------------|
| (q)PCR       | (Quantitative) polymerase chain reaction                    |
| AD           | Alzheimer’s Disease                                         |
| ALS          | Amyotrophic Lateral Sclerosis                               |
| Ast          | Astrocytes                                                  |
| ATAC-seq     | Assay for Transposase-Accessible Chromatin using sequencing |
| BH           | Benjamini-Hochberg                                          |
| bp           | Base pairs                                                  |
| BP           | biological process                                          |
| CBD          | Corticobasal Degeneration                                   |
| CC           | cellular compartment                                        |
| CMA          | Chaperon-mediated autophagy                                 |
| CRE          | <i>Cis</i> -regulatory element                              |
| DAR          | Differentially accessible region                            |
| DEG          | Differentially expressed gene                               |
| DNA          | Desoxyribonucleic acid                                      |
| FDR          | False discovery rate                                        |
| FTD          | Frontotemporal Dementia                                     |
| GA           | Gene accessibility                                          |
| Gb           | Giga bases                                                  |
| GO           | Gene ontology                                               |

|          |                                                       |
|----------|-------------------------------------------------------|
| GSEA     | Gene-set enrichment analysis                          |
| GWAS     | Genome-wide association study                         |
| kNN      | k-nearest neighbor                                    |
| LSI      | latent semantic indexing                              |
| LBD      | Lewy Body Dementia                                    |
| Lime     | Local interpretable model-agnostic explanations       |
| Log2-FC  | Binary logarithm fold-change                          |
| MF       | molecular function                                    |
| ML       | Machine learning                                      |
| MSA      | Multiple System Atrophy                               |
| PCA      | Principle component analysis                          |
| PD       | Parkinson Disease                                     |
| PMI      | <i>Post mortal</i> interval                           |
| PSP      | Progressive Supranuclear Palsy                        |
| pTau     | Hyperphosphorylated Tau                               |
| RAP      | Regulon activity profile                              |
| RNA-seq  | Ribonucleotide acid sequencing                        |
| RTN      | Reconstruction of transcriptional regulatory networks |
| sn*      | Single nulcei                                         |
| TA       | Tufted astrocyte                                      |
| TF(M)(E) | Transcription factor (motif) (enrichment)             |
| UMAP     | Uniform Manifold Approximation and Projection         |
| UPR      | Unfolded protein response                             |
| UPS      | Ubiquitin proteasome system                           |
| XGB      | Extreme gradient boosting                             |
