# Supplementary material for: Single-nucleus chromatin accessibility profiling highlights distinct astrocyte signatures in progressive supranuclear palsy and corticobasal degeneration
Source: Acta Neuropathol. 2022 Aug 17;144(4):615–35. doi: 10.1007/s00401-022-02483-8 (PMC9468099; doi:10.1007/s00401-022-02483-8)
Supplement: Supplementary file 3 — (XLSX 134 KB) [file 401_2022_2483_MOESM3_ESM.xlsx]

## Sheet: Suppl.Data01
Table	Description
T0	Comprehensive information about covariates of PSP, CBD, and Ctrl subjects. Abbreviations: Aβ42, amyloid beta 42; AGD, Argyrophilic Grain Disease; CERAD, Consortium to Establish a Registry for Alzheimer's Disease; Ctrl, control; IHC; immunohistochemistry; LBs, Lewy bodies; NA, not assessable; neg, negative; NFT, neurofibrillary tangles; ns, not specified; PMI, post mortem interval. # In study-rele…
T01	Marker genes used to identify cell populations resulting from snATAC-seq. These genes were derived from McKenzie et al. and Lake et. Al (see Methods). Abbreviations: DLN, deep-layer neurons; Exc., excitatory; Inh. Inhibitory neurons; Neu., neurons; Oligodendro, Oligodendrocytes; ULN, upper-layer neurons.
T02	Diagnosis- and cell type-wise statistical comparison of tauopathy-associated genes. Wilcoxon rank sum test and Bonferroni adjustment for multiple hypothesis testing were applied. Each gene-cell type-pair was compared with its complement in derived from the Ctrl cases. Abbreviations: adj.pvalue, adjusted pvalue; ct, cell type; dis, disease/diagnosis; ct_gene, gene-cell type-pair; median.diff, diff…
T03	Diagnosis- and cell type-wise statistical comparison of transcription factor motif enrichment (TFME) in astrocytes (Ast, snATAC-seq). Wilcoxon rank sum test and Benjamini-Hochberg (BH) adjustment for multiple hypothesis testing were applied. Each TFME was compared between the astrocytes of each disease/diagnosis (PSP, CBD, Ctrl). Abbreviations: adj.pvalue, adjusted pvalue; ct, cell type; dis, dis…
T04	TFMs that are significantly different between disease/diagnosis-wise comparisons in astrocytes (Ast,T03) and which show exclusive derangement in the indicated comparison. Abbreviations: adj.pvalue, adjusted pvalue; ct, cell type; dis, disease/diagnosis; Median.diff, difference between medians; obs., observations; TFM, transcription factor motif.
T05	10x Genomics™ sample indices used in snATAC-seq

## Sheet: T0
ID	Age [years]	Sex	Post Mortem Interval [hours]	Neuropathological Diagnosis	Disease Duration [years]	Neurological Diagnosis (last ante mortem)	Clinical Symptoms	Brain weight [g]	Tau Isoform# [IHC: 4R/3R]	AGD	Braak&Braak (NFT)	CERAD-plaque density	Thal-Phase	Aβ42 (4G8)	α-synuclein (Braak; LBs)	TDP-43	FUS
PSP1	68	Male	37.5	PSP	6	Progressive Supranuclear Palsy, Richardson-Syndrome	vertical gaze palsy, axial rigidity, recurrent falls, mild cognitive impariment (MoCA 25/20), perseveration, dysarthrophonia, dysphagia	1460	+/-	-	1	0	0	No	0	neg	neg
PSP2	77	Female	78	PSP	2.5	Progressive Supranuclear Palsy, subtype undefined	vertical gaze palsy, square-wave-jerks, axial rigidity, left-dominating limb rigidity, limb dystonia, bradydiadochokinesia, dysarthrophonia, dysphagia	1112	+/-	-	0	0	0	No	0	neg	neg
PSP3	78	Male	41.5	PSP	9	Progressive Supranuclear Palsy, subtype undefined	vertical + horizontal gaze palsy, axial + minor limb rigidity, bradydiadochokinesia, postural instability + recurrent falls, mild cognitive impariment, disinhibition/positive primitive reflexes, affect lability, eye lid opening apraxia, dysarthria,	NA	+/-	+	1	0	1*	Yes*	0	neg	neg
PSP4	68	Female	7.33	PSP	7	behavioral variant Frontotemporal Dementia, Tauopathy	impulse control disorder, mild cognitive impairment (DemTec 10/20), hypokinesia, gait instability, recurrent falls, limb ataxia, dysarthria, staring facial expression, mandibular dystonia	1005	+/-	-	0	0	0	No	0	neg	neg
CBD1	52	Female	13.83	CBD	4.5	Progressive Supranuclear Palsy, Richardson-Syndrome	impulse control disorder, mild cognitive impairment, eye lid opening apraxia, recurrent falls, asymmetrically enhanced muscle tendon reflexes, minimal axial regidity	1260	+/-	-	0	0	0	No	0	neg	neg
CBD2	56	Male	43.5	CBD	2.5	Dementia, suspected behavioral vatiant Frontotemporal Dementia / Frontotemporal Lobar Degeneration	severe dementia with impulse control disorder, aggressive behavior, MMST 11/30, psychomotor slowing, bradykinesia, perseveration, global aphasia	NA	+/-	+	1	0	0	No	0	neg	neg
CBD3	59	Female	22.67	CBD	7	behavioral variant Frontotemporal Dementia with Corticobasal Syndrome	impulse control disorder, aggressive behavior, mutism, apraxia, aphasia, right-sided limb dystonia, retrocollis, positive pyramidal tract signs, disinhibition/positive primitive reflexes	1220	+/-	-	1	-	1*	Yes*	0	pos	neg
CBD4	59	Male	54.25	CBD	1.5	behavioral variant Frontotemporal Dementia vs. Frontotemporal Dementia-Motor Neuron Disease	apathy, psychomotor slowing, anarthria, aphasia, disinhibition/positive primitive reflexes, stimulus-sensitive myoclonus, left-dominated generalized rigidity, sceletal muscle fasciculations, hand muscle atrophy	1330	+/-	+	1	0	3*	Yes*	0	neg	neg
C1	58	Male	22	Ctrl	-	-	-	NA	-/-	-	1	-	0	-	0	pos	-
C2	82	Male	27	Ctrl	-	-	-	1035	-/-	-	2	-	1*	-	0	neg	neg
C3	86	Female	20	Ctrl	-	-	-	NA	-/-	-	1	-	0	-	0	-	-
C4	64	Female	33	Ctrl	-	-	-	1230	-/-	-	1	-	0	-	0	neg	neg
C5	53	Male	29	Ctrl	-	-	-	1792	-/-	-	0	-	2*	-	0	neg	neg

## Sheet: T01
celltype	gene
Astrocyte	CLDN10
Astrocyte	ETNPPL
Astrocyte	STON2
Astrocyte	TPD52L1
Astrocyte	GJA1
Astrocyte	GFAP
Exc..DLN	RORB
Exc..DLN	FOXP2
Exc..DLN	TSHZ2
Exc..Neu.	NEFM
Exc..Neu.	BCL11B
Exc..Neu.	SATB2
Exc..ULN	CBLN2
Exc..ULN	CUX2
Exc..ULN	RASGRF2
Inh..PVALB.SST	PVALB
Inh..PVALB.SST	SST
Inh..PVALB.SST	TAC1
Inh..VIP	VIP
Inh..VIP	TAC3
Inh..VIP	CALB2
Microglia	TREM2
Microglia	CD68
Microglia	OLR1
Microglia	HLA-DPA1
Microglia	CCL4
Microglia	PIK3AP1
Oligodendro	MOBP
Oligodendro	CLCA4
Oligodendro	PAIP2B
Oligodendro	QDPR
Oligodendro	SOX2-OT
Oligodendro	TMEM144

## Sheet: T02
	obs.x	obs.y	obs.tot	statistic	pvalue	alternative	location.null	exact	corrected	adj.pvalue	median.diff	ct	gene	updown	comp	dis	ct_gene
1	643	2351	2994	674388	2.74478e-05	two.sided	0	FALSE	TRUE	0.00137239	-0.113104	Ast	TARDBP	down	Ast vs. Ctrl - adjust. method: Bonferroni	CBD	Ast:TARDBP
2	643	2351	2994	861276	5.70663e-08	two.sided	0	FALSE	TRUE	2.85331e-06	0.541844	Ast	ALOX5	up	Ast vs. Ctrl - adjust. method: Bonferroni	CBD	Ast:ALOX5
3	643	2351	2994	842792	7.59997e-06	two.sided	0	FALSE	TRUE	0.000379998	0.230008	Ast	GABPA	up	Ast vs. Ctrl - adjust. method: Bonferroni	CBD	Ast:GABPA
4	643	2351	2994	650117	5.23309e-08	two.sided	0	FALSE	TRUE	2.61655e-06	-0.223007	Ast	UBB	down	Ast vs. Ctrl - adjust. method: Bonferroni	CBD	Ast:UBB
5	643	2351	2994	847145	2.59833e-06	two.sided	0	FALSE	TRUE	0.000129917	0.106056	Ast	REG1A	up	Ast vs. Ctrl - adjust. method: Bonferroni	CBD	Ast:REG1A
6	643	2351	2994	677779	5.8423e-05	two.sided	0	FALSE	TRUE	0.00292115	-0.196033	Ast	MSMB	down	Ast vs. Ctrl - adjust. method: Bonferroni	CBD	Ast:MSMB
7	643	2351	2994	834346	5.31484e-05	two.sided	0	FALSE	TRUE	0.00265742	0.601715	Ast	MAPK8	up	Ast vs. Ctrl - adjust. method: Bonferroni	CBD	Ast:MAPK8
8	643	2351	2994	637896	1.26035e-09	two.sided	0	FALSE	TRUE	6.30174e-08	-0.239427	Ast	PSPN	down	Ast vs. Ctrl - adjust. method: Bonferroni	CBD	Ast:PSPN
9	643	2351	2994	830214	0.000128871	two.sided	0	FALSE	TRUE	0.00644356	0.38721	Ast	EIF2AK3	up	Ast vs. Ctrl - adjust. method: Bonferroni	CBD	Ast:EIF2AK3
10	643	2351	2994	689313	0.000614141	two.sided	0	FALSE	TRUE	0.030707	-0.295189	Ast	DLG4	down	Ast vs. Ctrl - adjust. method: Bonferroni	CBD	Ast:DLG4
11	161	2325	2486	133967	1.54617e-09	two.sided	0	FALSE	TRUE	7.73086e-08	-3.16838	Exc. DLN	MAPT	down	Exc. DLN vs. Ctrl - adjust. method: Bonferroni	CBD	Exc. DLN:MAPT
12	161	2325	2486	221894	8.04113e-05	two.sided	0	FALSE	TRUE	0.00402057	1.50499	Exc. DLN	NFE2L2	up	Exc. DLN vs. Ctrl - adjust. method: Bonferroni	CBD	Exc. DLN:NFE2L2
13	161	2325	2486	153847	0.00015532	two.sided	0	FALSE	TRUE	0.00776599	-0.291512	Exc. DLN	PRNP	down	Exc. DLN vs. Ctrl - adjust. method: Bonferroni	CBD	Exc. DLN:PRNP
14	161	2325	2486	220735	0.000138079	two.sided	0	FALSE	TRUE	0.00690395	0.13171	Exc. DLN	RIDA	up	Exc. DLN vs. Ctrl - adjust. method: Bonferroni	CBD	Exc. DLN:RIDA
15	161	2325	2486	133170	8.79005e-10	two.sided	0	FALSE	TRUE	4.39502e-08	-2.38138	Exc. DLN	MAPK8	down	Exc. DLN vs. Ctrl - adjust. method: Bonferroni	CBD	Exc. DLN:MAPK8
16	161	2325	2486	136900	1.15338e-08	two.sided	0	FALSE	TRUE	5.76692e-07	-0.49696	Exc. DLN	PSPN	down	Exc. DLN vs. Ctrl - adjust. method: Bonferroni	CBD	Exc. DLN:PSPN
17	161	2325	2486	150800	3.65382e-05	two.sided	0	FALSE	TRUE	0.00182691	-0.893438	Exc. DLN	PARK7	down	Exc. DLN vs. Ctrl - adjust. method: Bonferroni	CBD	Exc. DLN:PARK7
18	161	2325	2486	133247	9.28621e-10	two.sided	0	FALSE	TRUE	4.64311e-08	-1.5934	Exc. DLN	CRK	down	Exc. DLN vs. Ctrl - adjust. method: Bonferroni	CBD	Exc. DLN:CRK
19	161	2325	2486	219452	0.000246452	two.sided	0	FALSE	TRUE	0.0123226	0.320403	Exc. DLN	CX3CR1	up	Exc. DLN vs. Ctrl - adjust. method: Bonferroni	CBD	Exc. DLN:CX3CR1
20	161	2325	2486	155254	0.000291586	two.sided	0	FALSE	TRUE	0.0145793	-0.587257	Exc. DLN	ADNP	down	Exc. DLN vs. Ctrl - adjust. method: Bonferroni	CBD	Exc. DLN:ADNP
21	161	2325	2486	137509	1.72702e-08	two.sided	0	FALSE	TRUE	8.63512e-07	-2.12385	Exc. DLN	RNF19A	down	Exc. DLN vs. Ctrl - adjust. method: Bonferroni	CBD	Exc. DLN:RNF19A
22	161	2325	2486	132879	7.13796e-10	two.sided	0	FALSE	TRUE	3.56898e-08	-1.58333	Exc. DLN	SGSM3	down	Exc. DLN vs. Ctrl - adjust. method: Bonferroni	CBD	Exc. DLN:SGSM3
23	161	2325	2486	136823	1.09563e-08	two.sided	0	FALSE	TRUE	5.47813e-07	-1.26744	Exc. DLN	IGLON5	down	Exc. DLN vs. Ctrl - adjust. method: Bonferroni	CBD	Exc. DLN:IGLON5
24	161	2325	2486	136289	7.6567e-09	two.sided	0	FALSE	TRUE	3.82835e-07	-1.93723	Exc. DLN	MAPK1	down	Exc. DLN vs. Ctrl - adjust. method: Bonferroni	CBD	Exc. DLN:MAPK1
25	161	2325	2486	137577	1.80613e-08	two.sided	0	FALSE	TRUE	9.03066e-07	-1.9155	Exc. DLN	GRAP2	down	Exc. DLN vs. Ctrl - adjust. method: Bonferroni	CBD	Exc. DLN:GRAP2
26	161	2325	2486	147652	7.26569e-06	two.sided	0	FALSE	TRUE	0.000363285	-1.5507	Exc. DLN	DLG4	down	Exc. DLN vs. Ctrl - adjust. method: Bonferroni	CBD	Exc. DLN:DLG4
27	75	1603	1678	43536	5.30998e-05	two.sided	0	FALSE	TRUE	0.00265499	-2.10248	Exc. N. NEFM|BCL11B	SNCA	down	Exc. N. NEFM|BCL11B vs. Ctrl - adjust. method: Bonferroni	CBD	Exc. N. NEFM|BCL11B:SNCA
28	75	1603	1678	46150	0.000663573	two.sided	0	FALSE	TRUE	0.0331786	-0.939238	Exc. N. NEFM|BCL11B	RNF19A	down	Exc. N. NEFM|BCL11B vs. Ctrl - adjust. method: Bonferroni	CBD	Exc. N. NEFM|BCL11B:RNF19A
29	75	1603	1678	44863	0.000200807	two.sided	0	FALSE	TRUE	0.0100404	-0.353375	Exc. N. NEFM|BCL11B	SOD1	down	Exc. N. NEFM|BCL11B vs. Ctrl - adjust. method: Bonferroni	CBD	Exc. N. NEFM|BCL11B:SOD1
30	236	4917	5153	700652	6.84693e-08	two.sided	0	FALSE	TRUE	3.42347e-06	3.0526	Exc. ULN	GSK3B	up	Exc. ULN vs. Ctrl - adjust. method: Bonferroni	CBD	Exc. ULN:GSK3B
31	236	4917	5153	472689	1.46457e-06	two.sided	0	FALSE	TRUE	7.32284e-05	-0.940654	Exc. ULN	RMDN2	down	Exc. ULN vs. Ctrl - adjust. method: Bonferroni	CBD	Exc. ULN:RMDN2
32	236	4917	5153	670012	5.75402e-05	two.sided	0	FALSE	TRUE	0.00287701	0.268558	Exc. ULN	TARDBP	up	Exc. ULN vs. Ctrl - adjust. method: Bonferroni	CBD	Exc. ULN:TARDBP
33	236	4917	5153	490901	6.32792e-05	two.sided	0	FALSE	TRUE	0.00316396	-0.637502	Exc. ULN	RMDN1	down	Exc. ULN vs. Ctrl - adjust. method: Bonferroni	CBD	Exc. ULN:RMDN1
34	236	4917	5153	462482	1.34054e-07	two.sided	0	FALSE	TRUE	6.70272e-06	-0.864502	Exc. ULN	RMDN3	down	Exc. ULN vs. Ctrl - adjust. method: Bonferroni	CBD	Exc. ULN:RMDN3
35	236	4917	5153	366241	9.32135e-22	two.sided	0	FALSE	TRUE	4.66067e-20	-5.43944	Exc. ULN	SYBU	down	Exc. ULN vs. Ctrl - adjust. method: Bonferroni	CBD	Exc. ULN:SYBU
36	236	4917	5153	401902	1.385e-15	two.sided	0	FALSE	TRUE	6.92498e-14	-3.85485	Exc. ULN	SNCA	down	Exc. ULN vs. Ctrl - adjust. method: Bonferroni	CBD	Exc. ULN:SNCA
37	236	4917	5153	665930	0.000123119	two.sided	0	FALSE	TRUE	0.00615593	0.300722	Exc. ULN	GABPA	up	Exc. ULN vs. Ctrl - adjust. method: Bonferroni	CBD	Exc. ULN:GABPA
38	236	4917	5153	699308	9.55761e-08	two.sided	0	FALSE	TRUE	4.77881e-06	0.324095	Exc. ULN	APOE	up	Exc. ULN vs. Ctrl - adjust. method: Bonferroni	CBD	Exc. ULN:APOE
39	236	4917	5153	734553	4.72249e-12	two.sided	0	FALSE	TRUE	2.36125e-10	1.99532	Exc. ULN	NFE2L2	up	Exc. ULN vs. Ctrl - adjust. method: Bonferroni	CBD	Exc. ULN:NFE2L2
40	236	4917	5153	425661	4.43597e-12	two.sided	0	FALSE	TRUE	2.21798e-10	-1.7244	Exc. ULN	LRRK2	down	Exc. ULN vs. Ctrl - adjust. method: Bonferroni	CBD	Exc. ULN:LRRK2
41	236	4917	5153	666209	0.000117	two.sided	0	FALSE	TRUE	0.00584998	2.71815	Exc. ULN	APP	up	Exc. ULN vs. Ctrl - adjust. method: Bonferroni	CBD	Exc. ULN:APP
42	236	4917	5153	718871	5.25715e-10	two.sided	0	FALSE	TRUE	2.62858e-08	0.230968	Exc. ULN	REG1A	up	Exc. ULN vs. Ctrl - adjust. method: Bonferroni	CBD	Exc. ULN:REG1A
43	236	4917	5153	750390	2.47717e-14	two.sided	0	FALSE	TRUE	1.23859e-12	0.405379	Exc. ULN	RIDA	up	Exc. ULN vs. Ctrl - adjust. method: Bonferroni	CBD	Exc. ULN:RIDA
44	236	4917	5153	708022	1.0327e-08	two.sided	0	FALSE	TRUE	5.16352e-07	0.674977	Exc. ULN	BPIFA2	up	Exc. ULN vs. Ctrl - adjust. method: Bonferroni	CBD	Exc. ULN:BPIFA2
45	236	4917	5153	388246	8.07755e-18	two.sided	0	FALSE	TRUE	4.03878e-16	-3.68233	Exc. ULN	MAPK8	down	Exc. ULN vs. Ctrl - adjust. method: Bonferroni	CBD	Exc. ULN:MAPK8
46	236	4917	5153	437661	1.71367e-10	two.sided	0	FALSE	TRUE	8.56833e-09	-0.552422	Exc. ULN	PSPN	down	Exc. ULN vs. Ctrl - adjust. method: Bonferroni	CBD	Exc. ULN:PSPN
47	236	4917	5153	463687	1.7966e-07	two.sided	0	FALSE	TRUE	8.98298e-06	-0.589954	Exc. ULN	PSPH	down	Exc. ULN vs. Ctrl - adjust. method: Bonferroni	CBD	Exc. ULN:PSPH
48	236	4917	5153	711948	3.61028e-09	two.sided	0	FALSE	TRUE	1.80514e-07	0.593791	Exc. ULN	STXBP3	up	Exc. ULN vs. Ctrl - adjust. method: Bonferroni	CBD	Exc. ULN:STXBP3
49	236	4917	5153	488989	4.39099e-05	two.sided	0	FALSE	TRUE	0.00219549	-0.576305	Exc. ULN	EIF2AK3	down	Exc. ULN vs. Ctrl - adjust. method: Bonferroni	CBD	Exc. ULN:EIF2AK3
50	236	4917	5153	725548	7.49938e-11	two.sided	0	FALSE	TRUE	3.74969e-09	0.244924	Exc. ULN	TREM2	up	Exc. ULN vs. Ctrl - adjust. method: Bonferroni	CBD	Exc. ULN:TREM2
51	236	4917	5153	465760	2.95362e-07	two.sided	0	FALSE	TRUE	1.47681e-05	-1.1202	Exc. ULN	BDNF	down	Exc. ULN vs. Ctrl - adjust. method: Bonferroni	CBD	Exc. ULN:BDNF
52	236	4917	5153	476642	3.50196e-06	two.sided	0	FALSE	TRUE	0.000175098	-0.952723	Exc. ULN	ADNP	down	Exc. ULN vs. Ctrl - adjust. method: Bonferroni	CBD	Exc. ULN:ADNP
53	236	4917	5153	451668	8.53137e-09	two.sided	0	FALSE	TRUE	4.26569e-07	-1.13184	Exc. ULN	RNF19A	down	Exc. ULN vs. Ctrl - adjust. method: Bonferroni	CBD	Exc. ULN:RNF19A
54	236	4917	5153	495294	0.000142689	two.sided	0	FALSE	TRUE	0.00713446	-0.230011	Exc. ULN	PIN1	down	Exc. ULN vs. Ctrl - adjust. method: Bonferroni	CBD	Exc. ULN:PIN1
55	236	4917	5153	460761	8.78066e-08	two.sided	0	FALSE	TRUE	4.39033e-06	-2.33746	Exc. ULN	MAPK1	down	Exc. ULN vs. Ctrl - adjust. method: Bonferroni	CBD	Exc. ULN:MAPK1
56	236	4917	5153	455197	2.14929e-08	two.sided	0	FALSE	TRUE	1.07465e-06	-0.376146	Exc. ULN	SOD1	down	Exc. ULN vs. Ctrl - adjust. method: Bonferroni	CBD	Exc. ULN:SOD1
57	236	4917	5153	450142	5.67841e-09	two.sided	0	FALSE	TRUE	2.8392e-07	-1.74101	Exc. ULN	GRAP2	down	Exc. ULN vs. Ctrl - adjust. method: Bonferroni	CBD	Exc. ULN:GRAP2
58	236	4917	5153	409767	2.26717e-14	two.sided	0	FALSE	TRUE	1.13358e-12	-1.61036	Exc. ULN	DLG4	down	Exc. ULN vs. Ctrl - adjust. method: Bonferroni	CBD	Exc. ULN:DLG4
59	1272	4053	5325	2297780	4.85719e-09	two.sided	0	FALSE	TRUE	2.42859e-07	-4.70676	Oli #1 MOBP	MAPT	down	Oli #1 MOBP vs. Ctrl - adjust. method: Bonferroni	CBD	Oli #1 MOBP:MAPT
60	1272	4053	5325	2782154	1.91987e-05	two.sided	0	FALSE	TRUE	0.000959933	1.74814	Oli #1 MOBP	GSK3B	up	Oli #1 MOBP vs. Ctrl - adjust. method: Bonferroni	CBD	Oli #1 MOBP:GSK3B
61	1272	4053	5325	2816877	5.73572e-07	two.sided	0	FALSE	TRUE	2.86786e-05	2.06482	Oli #1 MOBP	SNCA	up	Oli #1 MOBP vs. Ctrl - adjust. method: Bonferroni	CBD	Oli #1 MOBP:SNCA
62	1272	4053	5325	2814049	7.7807e-07	two.sided	0	FALSE	TRUE	3.89035e-05	0.380273	Oli #1 MOBP	ALOX5	up	Oli #1 MOBP vs. Ctrl - adjust. method: Bonferroni	CBD	Oli #1 MOBP:ALOX5
63	1272	4053	5325	2784628	1.52026e-05	two.sided	0	FALSE	TRUE	0.000760131	0.277173	Oli #1 MOBP	GABPA	up	Oli #1 MOBP vs. Ctrl - adjust. method: Bonferroni	CBD	Oli #1 MOBP:GABPA
64	1272	4053	5325	2246220	4.21215e-12	two.sided	0	FALSE	TRUE	2.10608e-10	-0.730666	Oli #1 MOBP	UBB	down	Oli #1 MOBP vs. Ctrl - adjust. method: Bonferroni	CBD	Oli #1 MOBP:UBB
65	1272	4053	5325	2923634	4.76964e-13	two.sided	0	FALSE	TRUE	2.38482e-11	0.197203	Oli #1 MOBP	RIDA	up	Oli #1 MOBP vs. Ctrl - adjust. method: Bonferroni	CBD	Oli #1 MOBP:RIDA
66	1272	4053	5325	2840901	3.75207e-08	two.sided	0	FALSE	TRUE	1.87604e-06	1.80087	Oli #1 MOBP	MAPK8	up	Oli #1 MOBP vs. Ctrl - adjust. method: Bonferroni	CBD	Oli #1 MOBP:MAPK8
67	1272	4053	5325	2314105	3.57385e-08	two.sided	0	FALSE	TRUE	1.78693e-06	-0.128133	Oli #1 MOBP	PSPN	down	Oli #1 MOBP vs. Ctrl - adjust. method: Bonferroni	CBD	Oli #1 MOBP:PSPN
68	1272	4053	5325	2982385	2.67565e-17	two.sided	0	FALSE	TRUE	1.33782e-15	0.681787	Oli #1 MOBP	PSPH	up	Oli #1 MOBP vs. Ctrl - adjust. method: Bonferroni	CBD	Oli #1 MOBP:PSPH
69	1272	4053	5325	2993862	3.32325e-18	two.sided	0	FALSE	TRUE	1.66162e-16	0.882039	Oli #1 MOBP	EIF2AK3	up	Oli #1 MOBP vs. Ctrl - adjust. method: Bonferroni	CBD	Oli #1 MOBP:EIF2AK3
70	1272	4053	5325	2318158	5.76366e-08	two.sided	0	FALSE	TRUE	2.88183e-06	-0.889656	Oli #1 MOBP	MAPK14	down	Oli #1 MOBP vs. Ctrl - adjust. method: Bonferroni	CBD	Oli #1 MOBP:MAPK14
71	1272	4053	5325	2823470	2.78064e-07	two.sided	0	FALSE	TRUE	1.39032e-05	0.258949	Oli #1 MOBP	CX3CR1	up	Oli #1 MOBP vs. Ctrl - adjust. method: Bonferroni	CBD	Oli #1 MOBP:CX3CR1
72	1272	4053	5325	2408485	0.000403687	two.sided	0	FALSE	TRUE	0.0201844	-0.143154	Oli #1 MOBP	FKBP4	down	Oli #1 MOBP vs. Ctrl - adjust. method: Bonferroni	CBD	Oli #1 MOBP:FKBP4
73	1272	4053	5325	2886112	1.13865e-10	two.sided	0	FALSE	TRUE	5.69323e-09	0.548557	Oli #1 MOBP	RNF19A	up	Oli #1 MOBP vs. Ctrl - adjust. method: Bonferroni	CBD	Oli #1 MOBP:RNF19A
74	1272	4053	5325	2367992	1.16422e-05	two.sided	0	FALSE	TRUE	0.000582108	-0.134067	Oli #1 MOBP	POLDIP2	down	Oli #1 MOBP vs. Ctrl - adjust. method: Bonferroni	CBD	Oli #1 MOBP:POLDIP2
75	1272	4053	5325	2745886	0.000438406	two.sided	0	FALSE	TRUE	0.0219203	0.205852	Oli #1 MOBP	SOD1	up	Oli #1 MOBP vs. Ctrl - adjust. method: Bonferroni	CBD	Oli #1 MOBP:SOD1
76	1272	4053	5325	2383193	4.77448e-05	two.sided	0	FALSE	TRUE	0.00238724	-0.163474	Oli #1 MOBP	DLG4	down	Oli #1 MOBP vs. Ctrl - adjust. method: Bonferroni	CBD	Oli #1 MOBP:DLG4
77	1298	3794	5092	2620514	0.000539078	two.sided	0	FALSE	TRUE	0.0269539	1.77182	Oli #2	GSK3B	up	Oli #2 vs. Ctrl - adjust. method: Bonferroni	CBD	Oli #2:GSK3B
78	1298	3794	5092	2618087	0.000655703	two.sided	0	FALSE	TRUE	0.0327852	0.385444	Oli #2	RMDN1	up	Oli #2 vs. Ctrl - adjust. method: Bonferroni	CBD	Oli #2:RMDN1
79	1298	3794	5092	2653933	2.77071e-05	two.sided	0	FALSE	TRUE	0.00138535	0.131899	Oli #2	RMDN3	up	Oli #2 vs. Ctrl - adjust. method: Bonferroni	CBD	Oli #2:RMDN3
80	1298	3794	5092	2688523	7.49257e-07	two.sided	0	FALSE	TRUE	3.74628e-05	2.56557	Oli #2	SNCA	up	Oli #2 vs. Ctrl - adjust. method: Bonferroni	CBD	Oli #2:SNCA
81	1298	3794	5092	2640477	9.73081e-05	two.sided	0	FALSE	TRUE	0.0048654	0.294012	Oli #2	GABPA	up	Oli #2 vs. Ctrl - adjust. method: Bonferroni	CBD	Oli #2:GABPA
82	1298	3794	5092	2624929	0.000374944	two.sided	0	FALSE	TRUE	0.0187472	1.86068	Oli #2	NFE2L2	up	Oli #2 vs. Ctrl - adjust. method: Bonferroni	CBD	Oli #2:NFE2L2
83	1298	3794	5092	2621647	0.00049153	two.sided	0	FALSE	TRUE	0.0245765	4.32882	Oli #2	APP	up	Oli #2 vs. Ctrl - adjust. method: Bonferroni	CBD	Oli #2:APP
84	1298	3794	5092	2633034	0.000188161	two.sided	0	FALSE	TRUE	0.00940803	0.120009	Oli #2	RIDA	up	Oli #2 vs. Ctrl - adjust. method: Bonferroni	CBD	Oli #2:RIDA
85	1298	3794	5092	2616361	0.000752481	two.sided	0	FALSE	TRUE	0.037624	0.118776	Oli #2	SIRT1	up	Oli #2 vs. Ctrl - adjust. method: Bonferroni	CBD	Oli #2:SIRT1
86	1298	3794	5092	2686697	9.19161e-07	two.sided	0	FALSE	TRUE	4.59581e-05	0.789157	Oli #2	MAPK8	up	Oli #2 vs. Ctrl - adjust. method: Bonferroni	CBD	Oli #2:MAPK8
87	1298	3794	5092	2623724	0.000414365	two.sided	0	FALSE	TRUE	0.0207183	0.251552	Oli #2	PSPH	up	Oli #2 vs. Ctrl - adjust. method: Bonferroni	CBD	Oli #2:PSPH
88	1298	3794	5092	2621357	0.000503313	two.sided	0	FALSE	TRUE	0.0251656	0.593916	Oli #2	STXBP3	up	Oli #2 vs. Ctrl - adjust. method: Bonferroni	CBD	Oli #2:STXBP3
89	1298	3794	5092	2691721	5.21871e-07	two.sided	0	FALSE	TRUE	2.60936e-05	0.687315	Oli #2	RNF19A	up	Oli #2 vs. Ctrl - adjust. method: Bonferroni	CBD	Oli #2:RNF19A
90	129	1345	1474	65989	6.92356e-06	two.sided	0	FALSE	TRUE	0.000346178	-0.427399	OPC	RMDN3	down	OPC vs. Ctrl - adjust. method: Bonferroni	CBD	OPC:RMDN3
91	129	1345	1474	106191	2.56379e-05	two.sided	0	FALSE	TRUE	0.0012819	0.660657	OPC	GABPA	up	OPC vs. Ctrl - adjust. method: Bonferroni	CBD	OPC:GABPA
92	129	1345	1474	102818	0.000503817	two.sided	0	FALSE	TRUE	0.0251908	1.89362	OPC	MAPK8	up	OPC vs. Ctrl - adjust. method: Bonferroni	CBD	OPC:MAPK8
93	129	1345	1474	105690	4.1204e-05	two.sided	0	FALSE	TRUE	0.0020602	1.36624	OPC	EIF2AK3	up	OPC vs. Ctrl - adjust. method: Bonferroni	CBD	OPC:EIF2AK3
94	129	1345	1474	70598	0.000468777	two.sided	0	FALSE	TRUE	0.0234388	-1.11218	OPC	CRK	down	OPC vs. Ctrl - adjust. method: Bonferroni	CBD	OPC:CRK
95	1431	2351	3782	1558012	0.000138125	two.sided	0	FALSE	TRUE	0.00690626	-0.218725	Ast	RMDN3	down	Ast vs. Ctrl - adjust. method: Bonferroni	PSP	Ast:RMDN3
96	1431	2351	3782	1791177	0.000813726	two.sided	0	FALSE	TRUE	0.0406863	0.585213	Ast	SNCA	up	Ast vs. Ctrl - adjust. method: Bonferroni	PSP	Ast:SNCA
97	1431	2351	3782	1893232	9.0631e-11	two.sided	0	FALSE	TRUE	4.53155e-09	0.538515	Ast	ALOX5	up	Ast vs. Ctrl - adjust. method: Bonferroni	PSP	Ast:ALOX5
98	1431	2351	3782	1570611	0.000615629	two.sided	0	FALSE	TRUE	0.0307814	-0.128361	Ast	UBB	down	Ast vs. Ctrl - adjust. method: Bonferroni	PSP	Ast:UBB
99	1431	2351	3782	1828204	7.28995e-06	two.sided	0	FALSE	TRUE	0.000364497	0.172164	Ast	BPIFA2	up	Ast vs. Ctrl - adjust. method: Bonferroni	PSP	Ast:BPIFA2
100	1431	2351	3782	1549065	4.38439e-05	two.sided	0	FALSE	TRUE	0.0021922	-0.12503	Ast	MSMB	down	Ast vs. Ctrl - adjust. method: Bonferroni	PSP	Ast:MSMB
101	1431	2351	3782	1833738	3.24027e-06	two.sided	0	FALSE	TRUE	0.000162014	0.570048	Ast	MAPK8	up	Ast vs. Ctrl - adjust. method: Bonferroni	PSP	Ast:MAPK8
102	1431	2351	3782	1572609	0.000770214	two.sided	0	FALSE	TRUE	0.0385107	-0.11007	Ast	PSPN	down	Ast vs. Ctrl - adjust. method: Bonferroni	PSP	Ast:PSPN
103	1431	2351	3782	1800455	0.000280172	two.sided	0	FALSE	TRUE	0.0140086	0.211037	Ast	HSP90AA1	up	Ast vs. Ctrl - adjust. method: Bonferroni	PSP	Ast:HSP90AA1
104	1431	2351	3782	1541240	1.51493e-05	two.sided	0	FALSE	TRUE	0.000757466	-0.32457	Ast	POLDIP2	down	Ast vs. Ctrl - adjust. method: Bonferroni	PSP	Ast:POLDIP2
105	1431	2351	3782	1565957	0.000360348	two.sided	0	FALSE	TRUE	0.0180174	-0.183293	Ast	SOD1	down	Ast vs. Ctrl - adjust. method: Bonferroni	PSP	Ast:SOD1
106	1431	2351	3782	1569172	0.00052275	two.sided	0	FALSE	TRUE	0.0261375	-0.506741	Ast	AKT1	down	Ast vs. Ctrl - adjust. method: Bonferroni	PSP	Ast:AKT1
107	1879	2325	4204	1939524	3.92414e-10	two.sided	0	FALSE	TRUE	1.96207e-08	-1.77456	Exc. DLN	MAPT	down	Exc. DLN vs. Ctrl - adjust. method: Bonferroni	PSP	Exc. DLN:MAPT
108	1879	2325	4204	1951968	2.86823e-09	two.sided	0	FALSE	TRUE	1.43411e-07	-1.75339	Exc. DLN	RMDN2	down	Exc. DLN vs. Ctrl - adjust. method: Bonferroni	PSP	Exc. DLN:RMDN2
109	1879	2325	4204	2371761	1.66597e-06	two.sided	0	FALSE	TRUE	8.32985e-05	0.247452	Exc. DLN	ALOX5	up	Exc. DLN vs. Ctrl - adjust. method: Bonferroni	PSP	Exc. DLN:ALOX5
110	1879	2325	4204	2547213	1.78479e-20	two.sided	0	FALSE	TRUE	8.92396e-19	1.02191	Exc. DLN	NFE2L2	up	Exc. DLN vs. Ctrl - adjust. method: Bonferroni	PSP	Exc. DLN:NFE2L2
111	1879	2325	4204	1923624	2.67577e-11	two.sided	0	FALSE	TRUE	1.33788e-09	-0.252323	Exc. DLN	PRNP	down	Exc. DLN vs. Ctrl - adjust. method: Bonferroni	PSP	Exc. DLN:PRNP
112	1879	2325	4204	1810306	1.18197e-21	two.sided	0	FALSE	TRUE	5.90984e-20	-1.64558	Exc. DLN	MAPK8	down	Exc. DLN vs. Ctrl - adjust. method: Bonferroni	PSP	Exc. DLN:MAPK8
113	1879	2325	4204	1765566	9.84351e-27	two.sided	0	FALSE	TRUE	4.92176e-25	-0.453361	Exc. DLN	PSPN	down	Exc. DLN vs. Ctrl - adjust. method: Bonferroni	PSP	Exc. DLN:PSPN
114	1879	2325	4204	2360940	6.37198e-06	two.sided	0	FALSE	TRUE	0.000318599	0.206945	Exc. DLN	STXBP3	up	Exc. DLN vs. Ctrl - adjust. method: Bonferroni	PSP	Exc. DLN:STXBP3
115	1879	2325	4204	2032517	0.000104341	two.sided	0	FALSE	TRUE	0.00521707	-0.361206	Exc. DLN	HSP90AA1	down	Exc. DLN vs. Ctrl - adjust. method: Bonferroni	PSP	Exc. DLN:HSP90AA1
116	1879	2325	4204	2348723	2.65259e-05	two.sided	0	FALSE	TRUE	0.0013263	1.27186	Exc. DLN	BDNF	up	Exc. DLN vs. Ctrl - adjust. method: Bonferroni	PSP	Exc. DLN:BDNF
117	1879	2325	4204	1936113	2.23591e-10	two.sided	0	FALSE	TRUE	1.11796e-08	-0.520212	Exc. DLN	PARK7	down	Exc. DLN vs. Ctrl - adjust. method: Bonferroni	PSP	Exc. DLN:PARK7
118	1879	2325	4204	1771057	4.4346e-26	two.sided	0	FALSE	TRUE	2.2173e-24	-1.18372	Exc. DLN	CRK	down	Exc. DLN vs. Ctrl - adjust. method: Bonferroni	PSP	Exc. DLN:CRK
119	1879	2325	4204	1891122	6.67596e-14	two.sided	0	FALSE	TRUE	3.33798e-12	-0.133814	Exc. DLN	FKBP4	down	Exc. DLN vs. Ctrl - adjust. method: Bonferroni	PSP	Exc. DLN:FKBP4
120	1879	2325	4204	1914835	5.65721e-12	two.sided	0	FALSE	TRUE	2.8286e-10	-0.494698	Exc. DLN	ADNP	down	Exc. DLN vs. Ctrl - adjust. method: Bonferroni	PSP	Exc. DLN:ADNP
121	1879	2325	4204	1942638	6.51548e-10	two.sided	0	FALSE	TRUE	3.25774e-08	-0.765797	Exc. DLN	RNF19A	down	Exc. DLN vs. Ctrl - adjust. method: Bonferroni	PSP	Exc. DLN:RNF19A
122	1879	2325	4204	1890814	6.28693e-14	two.sided	0	FALSE	TRUE	3.14347e-12	-0.317985	Exc. DLN	POLDIP2	down	Exc. DLN vs. Ctrl - adjust. method: Bonferroni	PSP	Exc. DLN:POLDIP2
123	1879	2325	4204	1759460	1.80414e-27	two.sided	0	FALSE	TRUE	9.02068e-26	-1.3562	Exc. DLN	SGSM3	down	Exc. DLN vs. Ctrl - adjust. method: Bonferroni	PSP	Exc. DLN:SGSM3
124	1879	2325	4204	1945474	1.02837e-09	two.sided	0	FALSE	TRUE	5.14186e-08	-0.321366	Exc. DLN	HSPA4	down	Exc. DLN vs. Ctrl - adjust. method: Bonferroni	PSP	Exc. DLN:HSPA4
125	1879	2325	4204	1906652	1.27338e-12	two.sided	0	FALSE	TRUE	6.36689e-11	-0.605614	Exc. DLN	IGLON5	down	Exc. DLN vs. Ctrl - adjust. method: Bonferroni	PSP	Exc. DLN:IGLON5
126	1879	2325	4204	1892646	8.97727e-14	two.sided	0	FALSE	TRUE	4.48863e-12	-0.20397	Exc. DLN	PIN1	down	Exc. DLN vs. Ctrl - adjust. method: Bonferroni	PSP	Exc. DLN:PIN1
127	1879	2325	4204	1799569	8.03349e-23	two.sided	0	FALSE	TRUE	4.01675e-21	-1.32614	Exc. DLN	MAPK1	down	Exc. DLN vs. Ctrl - adjust. method: Bonferroni	PSP	Exc. DLN:MAPK1
128	1879	2325	4204	1997203	1.72839e-06	two.sided	0	FALSE	TRUE	8.64197e-05	-0.182133	Exc. DLN	SOD1	down	Exc. DLN vs. Ctrl - adjust. method: Bonferroni	PSP	Exc. DLN:SOD1
129	1879	2325	4204	1833355	2.95119e-19	two.sided	0	FALSE	TRUE	1.47559e-17	-0.331491	Exc. DLN	AIMP2	down	Exc. DLN vs. Ctrl - adjust. method: Bonferroni	PSP	Exc. DLN:AIMP2
130	1879	2325	4204	1899466	3.31768e-13	two.sided	0	FALSE	TRUE	1.65884e-11	-0.864159	Exc. DLN	GRAP2	down	Exc. DLN vs. Ctrl - adjust. method: Bonferroni	PSP	Exc. DLN:GRAP2
131	1879	2325	4204	1991853	8.67333e-07	two.sided	0	FALSE	TRUE	4.33667e-05	-0.568623	Exc. DLN	DLG4	down	Exc. DLN vs. Ctrl - adjust. method: Bonferroni	PSP	Exc. DLN:DLG4
132	1879	2325	4204	1886826	2.87361e-14	two.sided	0	FALSE	TRUE	1.43681e-12	-0.717916	Exc. DLN	AKT1	down	Exc. DLN vs. Ctrl - adjust. method: Bonferroni	PSP	Exc. DLN:AKT1
133	827	1603	2430	607403	0.000717467	two.sided	0	FALSE	TRUE	0.0358734	-0.74828	Exc. N. NEFM|BCL11B	SNCA	down	Exc. N. NEFM|BCL11B vs. Ctrl - adjust. method: Bonferroni	PSP	Exc. N. NEFM|BCL11B:SNCA
134	827	1603	2430	732569	2.09175e-05	two.sided	0	FALSE	TRUE	0.00104587	0.181444	Exc. N. NEFM|BCL11B	GABPA	up	Exc. N. NEFM|BCL11B vs. Ctrl - adjust. method: Bonferroni	PSP	Exc. N. NEFM|BCL11B:GABPA
135	827	1603	2430	598748	9.19332e-05	two.sided	0	FALSE	TRUE	0.00459666	-0.102569	Exc. N. NEFM|BCL11B	UBB	down	Exc. N. NEFM|BCL11B vs. Ctrl - adjust. method: Bonferroni	PSP	Exc. N. NEFM|BCL11B:UBB
136	827	1603	2430	726559	0.00010102	two.sided	0	FALSE	TRUE	0.00505098	0.285086	Exc. N. NEFM|BCL11B	STXBP3	up	Exc. N. NEFM|BCL11B vs. Ctrl - adjust. method: Bonferroni	PSP	Exc. N. NEFM|BCL11B:STXBP3
137	827	1603	2430	602311	0.000221159	two.sided	0	FALSE	TRUE	0.0110579	-0.648755	Exc. N. NEFM|BCL11B	MAPK14	down	Exc. N. NEFM|BCL11B vs. Ctrl - adjust. method: Bonferroni	PSP	Exc. N. NEFM|BCL11B:MAPK14
138	827	1603	2430	593383	2.2519e-05	two.sided	0	FALSE	TRUE	0.00112595	-0.132929	Exc. N. NEFM|BCL11B	FKBP4	down	Exc. N. NEFM|BCL11B vs. Ctrl - adjust. method: Bonferroni	PSP	Exc. N. NEFM|BCL11B:FKBP4
139	827	1603	2430	594423	2.9816e-05	two.sided	0	FALSE	TRUE	0.0014908	-0.390849	Exc. N. NEFM|BCL11B	SGSM3	down	Exc. N. NEFM|BCL11B vs. Ctrl - adjust. method: Bonferroni	PSP	Exc. N. NEFM|BCL11B:SGSM3
140	827	1603	2430	587909	4.82268e-06	two.sided	0	FALSE	TRUE	0.000241134	-1.36775	Exc. N. NEFM|BCL11B	MAPK1	down	Exc. N. NEFM|BCL11B vs. Ctrl - adjust. method: Bonferroni	PSP	Exc. N. NEFM|BCL11B:MAPK1
141	827	1603	2430	576025	1.1738e-07	two.sided	0	FALSE	TRUE	5.86899e-06	-0.213439	Exc. N. NEFM|BCL11B	SOD1	down	Exc. N. NEFM|BCL11B vs. Ctrl - adjust. method: Bonferroni	PSP	Exc. N. NEFM|BCL11B:SOD1
142	827	1603	2430	583253	1.19497e-06	two.sided	0	FALSE	TRUE	5.97483e-05	-0.355256	Exc. N. NEFM|BCL11B	DLG4	down	Exc. N. NEFM|BCL11B vs. Ctrl - adjust. method: Bonferroni	PSP	Exc. N. NEFM|BCL11B:DLG4
143	1843	4917	6760	4949828	4.59349e-09	two.sided	0	FALSE	TRUE	2.29674e-07	1.49449	Exc. ULN	GSK3B	up	Exc. ULN vs. Ctrl - adjust. method: Bonferroni	PSP	Exc. ULN:GSK3B
144	1843	4917	6760	4288871	0.000701989	two.sided	0	FALSE	TRUE	0.0350994	-0.219578	Exc. ULN	RMDN3	down	Exc. ULN vs. Ctrl - adjust. method: Bonferroni	PSP	Exc. ULN:RMDN3
145	1843	4917	6760	4182764	1.0949e-06	two.sided	0	FALSE	TRUE	5.47451e-05	-1.04822	Exc. ULN	SYBU	down	Exc. ULN vs. Ctrl - adjust. method: Bonferroni	PSP	Exc. ULN:SYBU
146	1843	4917	6760	4242981	5.55327e-05	two.sided	0	FALSE	TRUE	0.00277664	-0.885699	Exc. ULN	SNCA	down	Exc. ULN vs. Ctrl - adjust. method: Bonferroni	PSP	Exc. ULN:SNCA
147	1843	4917	6760	4285801	0.000599665	two.sided	0	FALSE	TRUE	0.0299833	-0.138022	Exc. ULN	ALOX5	down	Exc. ULN vs. Ctrl - adjust. method: Bonferroni	PSP	Exc. ULN:ALOX5
148	1843	4917	6760	4782099	0.000441575	two.sided	0	FALSE	TRUE	0.0220788	0.127298	Exc. ULN	APOE	up	Exc. ULN vs. Ctrl - adjust. method: Bonferroni	PSP	Exc. ULN:APOE
149	1843	4917	6760	4820591	5.06522e-05	two.sided	0	FALSE	TRUE	0.00253261	0.464234	Exc. ULN	NFE2L2	up	Exc. ULN vs. Ctrl - adjust. method: Bonferroni	PSP	Exc. ULN:NFE2L2
150	1843	4917	6760	4255036	0.000112315	two.sided	0	FALSE	TRUE	0.00561573	-0.366378	Exc. ULN	LRRK2	down	Exc. ULN vs. Ctrl - adjust. method: Bonferroni	PSP	Exc. ULN:LRRK2
151	1843	4917	6760	4808507	0.000102971	two.sided	0	FALSE	TRUE	0.00514856	1.65915	Exc. ULN	APP	up	Exc. ULN vs. Ctrl - adjust. method: Bonferroni	PSP	Exc. ULN:APP
152	1843	4917	6760	4793481	0.000239538	two.sided	0	FALSE	TRUE	0.0119769	0.138586	Exc. ULN	PRNP	up	Exc. ULN vs. Ctrl - adjust. method: Bonferroni	PSP	Exc. ULN:PRNP
153	1843	4917	6760	4854324	6.04841e-06	two.sided	0	FALSE	TRUE	0.00030242	0.231607	Exc. ULN	BPIFA2	up	Exc. ULN vs. Ctrl - adjust. method: Bonferroni	PSP	Exc. ULN:BPIFA2
154	1843	4917	6760	4189421	1.74771e-06	two.sided	0	FALSE	TRUE	8.73854e-05	-1.11157	Exc. ULN	MAPK8	down	Exc. ULN vs. Ctrl - adjust. method: Bonferroni	PSP	Exc. ULN:MAPK8
155	1843	4917	6760	4116661	6.67604e-09	two.sided	0	FALSE	TRUE	3.33802e-07	-0.25527	Exc. ULN	PSPH	down	Exc. ULN vs. Ctrl - adjust. method: Bonferroni	PSP	Exc. ULN:PSPH
156	1843	4917	6760	4274160	0.000324789	two.sided	0	FALSE	TRUE	0.0162394	-0.20981	Exc. ULN	CX3CR1	down	Exc. ULN vs. Ctrl - adjust. method: Bonferroni	PSP	Exc. ULN:CX3CR1
157	1252	1907	3159	1103876	0.000336368	two.sided	0	FALSE	TRUE	0.0168184	-0.118324	Inh. N. SST|PVALB	MSMB	down	Inh. N. SST|PVALB vs. Ctrl - adjust. method: Bonferroni	PSP	Inh. N. SST|PVALB:MSMB
158	1252	1907	3159	1103349	0.000310274	two.sided	0	FALSE	TRUE	0.0155137	-0.348026	Inh. N. SST|PVALB	AKT1	down	Inh. N. SST|PVALB vs. Ctrl - adjust. method: Bonferroni	PSP	Inh. N. SST|PVALB:AKT1
159	3207	4053	7260	6126889	2.7197e-05	two.sided	0	FALSE	TRUE	0.00135985	-2.30166	Oli #1 MOBP	MAPT	down	Oli #1 MOBP vs. Ctrl - adjust. method: Bonferroni	PSP	Oli #1 MOBP:MAPT
160	3207	4053	7260	5859255	5.44964e-13	two.sided	0	FALSE	TRUE	2.72482e-11	-0.25155	Oli #1 MOBP	TARDBP	down	Oli #1 MOBP vs. Ctrl - adjust. method: Bonferroni	PSP	Oli #1 MOBP:TARDBP
161	3207	4053	7260	6833328	0.000163224	two.sided	0	FALSE	TRUE	0.00816118	0.378596	Oli #1 MOBP	SYBU	up	Oli #1 MOBP vs. Ctrl - adjust. method: Bonferroni	PSP	Oli #1 MOBP:SYBU
162	3207	4053	7260	6128544	2.95264e-05	two.sided	0	FALSE	TRUE	0.00147632	-1.34844	Oli #1 MOBP	NFE2L2	down	Oli #1 MOBP vs. Ctrl - adjust. method: Bonferroni	PSP	Oli #1 MOBP:NFE2L2
163	3207	4053	7260	6170621	0.000213377	two.sided	0	FALSE	TRUE	0.0106689	-0.314302	Oli #1 MOBP	UBB	down	Oli #1 MOBP vs. Ctrl - adjust. method: Bonferroni	PSP	Oli #1 MOBP:UBB
164	3207	4053	7260	6808455	0.0004838	two.sided	0	FALSE	TRUE	0.02419	0.940833	Oli #1 MOBP	LRRK2	up	Oli #1 MOBP vs. Ctrl - adjust. method: Bonferroni	PSP	Oli #1 MOBP:LRRK2
165	3207	4053	7260	6107461	1.01094e-05	two.sided	0	FALSE	TRUE	0.00050547	-5.49076	Oli #1 MOBP	APP	down	Oli #1 MOBP vs. Ctrl - adjust. method: Bonferroni	PSP	Oli #1 MOBP:APP
166	3207	4053	7260	6189195	0.00047729	two.sided	0	FALSE	TRUE	0.0238645	-0.145123	Oli #1 MOBP	SIRT1	down	Oli #1 MOBP vs. Ctrl - adjust. method: Bonferroni	PSP	Oli #1 MOBP:SIRT1
167	3207	4053	7260	6117418	1.68847e-05	two.sided	0	FALSE	TRUE	0.000844236	-0.820697	Oli #1 MOBP	STXBP3	down	Oli #1 MOBP vs. Ctrl - adjust. method: Bonferroni	PSP	Oli #1 MOBP:STXBP3
168	3207	4053	7260	6176293	0.000274048	two.sided	0	FALSE	TRUE	0.0137024	-0.826568	Oli #1 MOBP	HSP90AA1	down	Oli #1 MOBP vs. Ctrl - adjust. method: Bonferroni	PSP	Oli #1 MOBP:HSP90AA1
169	3207	4053	7260	6807035	0.000513608	two.sided	0	FALSE	TRUE	0.0256804	0.364508	Oli #1 MOBP	BDNF	up	Oli #1 MOBP vs. Ctrl - adjust. method: Bonferroni	PSP	Oli #1 MOBP:BDNF
170	3207	4053	7260	6126412	2.65587e-05	two.sided	0	FALSE	TRUE	0.00132794	-0.33495	Oli #1 MOBP	PARK7	down	Oli #1 MOBP vs. Ctrl - adjust. method: Bonferroni	PSP	Oli #1 MOBP:PARK7
171	3207	4053	7260	6128569	2.9563e-05	two.sided	0	FALSE	TRUE	0.00147815	-0.292371	Oli #1 MOBP	CRK	down	Oli #1 MOBP vs. Ctrl - adjust. method: Bonferroni	PSP	Oli #1 MOBP:CRK
172	3207	4053	7260	6116577	1.61764e-05	two.sided	0	FALSE	TRUE	0.000808819	-0.423531	Oli #1 MOBP	MAPK14	down	Oli #1 MOBP vs. Ctrl - adjust. method: Bonferroni	PSP	Oli #1 MOBP:MAPK14
173	3207	4053	7260	6839693	0.000122131	two.sided	0	FALSE	TRUE	0.00610656	0.153406	Oli #1 MOBP	CX3CR1	up	Oli #1 MOBP vs. Ctrl - adjust. method: Bonferroni	PSP	Oli #1 MOBP:CX3CR1
174	3207	4053	7260	6038356	2.05771e-07	two.sided	0	FALSE	TRUE	1.02885e-05	-0.463715	Oli #1 MOBP	ADNP	down	Oli #1 MOBP vs. Ctrl - adjust. method: Bonferroni	PSP	Oli #1 MOBP:ADNP
175	3207	4053	7260	6127742	2.83749e-05	two.sided	0	FALSE	TRUE	0.00141874	-0.11311	Oli #1 MOBP	POLDIP2	down	Oli #1 MOBP vs. Ctrl - adjust. method: Bonferroni	PSP	Oli #1 MOBP:POLDIP2
176	3207	4053	7260	6199080	0.000720321	two.sided	0	FALSE	TRUE	0.0360161	-0.253254	Oli #1 MOBP	SGSM3	down	Oli #1 MOBP vs. Ctrl - adjust. method: Bonferroni	PSP	Oli #1 MOBP:SGSM3
177	3207	4053	7260	6168830	0.000197007	two.sided	0	FALSE	TRUE	0.00985034	-1.13677	Oli #1 MOBP	MAPK1	down	Oli #1 MOBP vs. Ctrl - adjust. method: Bonferroni	PSP	Oli #1 MOBP:MAPK1
178	3207	4053	7260	6159163	0.000127194	two.sided	0	FALSE	TRUE	0.00635971	-1.08423	Oli #1 MOBP	GRAP2	down	Oli #1 MOBP vs. Ctrl - adjust. method: Bonferroni	PSP	Oli #1 MOBP:GRAP2
179	2623	3794	6417	5217328	0.000932304	two.sided	0	FALSE	TRUE	0.0466152	1.85242	Oli #2	GSK3B	up	Oli #2 vs. Ctrl - adjust. method: Bonferroni	PSP	Oli #2:GSK3B
180	2623	3794	6417	5281338	2.81941e-05	two.sided	0	FALSE	TRUE	0.00140971	0.186179	Oli #2	GABPA	up	Oli #2 vs. Ctrl - adjust. method: Bonferroni	PSP	Oli #2:GABPA
181	2623	3794	6417	4660446	1.53935e-05	two.sided	0	FALSE	TRUE	0.000769676	-0.104247	Oli #2	REG1A	down	Oli #2 vs. Ctrl - adjust. method: Bonferroni	PSP	Oli #2:REG1A
182	2623	3794	6417	5335103	8.45588e-07	two.sided	0	FALSE	TRUE	4.22794e-05	0.820736	Oli #2	MAPK8	up	Oli #2 vs. Ctrl - adjust. method: Bonferroni	PSP	Oli #2:MAPK8
183	2623	3794	6417	5247313	0.000198277	two.sided	0	FALSE	TRUE	0.00991385	0.132439	Oli #2	CRK	up	Oli #2 vs. Ctrl - adjust. method: Bonferroni	PSP	Oli #2:CRK
184	2623	3794	6417	5283550	2.46585e-05	two.sided	0	FALSE	TRUE	0.00123293	0.465263	Oli #2	RNF19A	up	Oli #2 vs. Ctrl - adjust. method: Bonferroni	PSP	Oli #2:RNF19A
185	2623	3794	6417	5260423	9.58355e-05	two.sided	0	FALSE	TRUE	0.00479178	0.168173	Oli #2	HSPA4	up	Oli #2 vs. Ctrl - adjust. method: Bonferroni	PSP	Oli #2:HSPA4
186	2623	3794	6417	5263605	7.99612e-05	two.sided	0	FALSE	TRUE	0.00399806	0.833855	Oli #2	MAPK1	up	Oli #2 vs. Ctrl - adjust. method: Bonferroni	PSP	Oli #2:MAPK1
187	2623	3794	6417	5254629	0.000132652	two.sided	0	FALSE	TRUE	0.0066326	0.147915	Oli #2	AKT1	up	Oli #2 vs. Ctrl - adjust. method: Bonferroni	PSP	Oli #2:AKT1

## Sheet: T03
	obs.x	obs.y	obs.tot	statistic	pvalue	alternative	location.null	exact	corrected	adj.pvalue	TFM	prefix	TF	comparison
1	2351	643	2994	173601	2.04873e-197	two.sided	0	FALSE	TRUE	7.90809e-195	MA0476.1_FOS	MA0476.1	FOS	CBD vs. Ctrl
2	2351	643	2994	175279	2.72726e-196	two.sided	0	FALSE	TRUE	3.50908e-194	MA0478.1_FOSL2	MA0478.1	FOSL2	CBD vs. Ctrl
3	2351	643	2994	175050	1.91642e-196	two.sided	0	FALSE	TRUE	3.50908e-194	MA0490.1_JUNB	MA0490.1	JUNB	CBD vs. Ctrl
4	2351	643	2994	175940	7.54573e-196	two.sided	0	FALSE	TRUE	7.28163e-194	MA0491.1_JUND	MA0491.1	JUND	CBD vs. Ctrl
5	2351	643	2994	176746	2.60585e-195	two.sided	0	FALSE	TRUE	2.01171e-193	MA0462.1_BATF::JUN	MA0462.1	BATF::JUN	CBD vs. Ctrl
6	2351	643	2994	178409	3.34305e-194	two.sided	0	FALSE	TRUE	2.15069e-192	MA0477.1_FOSL1	MA0477.1	FOSL1	CBD vs. Ctrl
7	2351	643	2994	180701	1.11245e-192	two.sided	0	FALSE	TRUE	6.13434e-191	MA0489.1_JUN(var.2)	MA0489.1	JUN(var.2)	CBD vs. Ctrl
8	2351	643	2994	183990	1.65951e-190	two.sided	0	FALSE	TRUE	8.00711e-189	MA0841.1_NFE2	MA0841.1	NFE2	CBD vs. Ctrl
9	2351	643	2994	187138	1.94465e-188	two.sided	0	FALSE	TRUE	8.34041e-187	MA0099.2_FOS::JUN	MA0099.2	FOS::JUN	CBD vs. Ctrl
10	2351	643	2994	197404	9.04665e-182	two.sided	0	FALSE	TRUE	3.49201e-180	MA0655.1_JDP2	MA0655.1	JDP2	CBD vs. Ctrl
11	2351	643	2994	203668	9.23335e-178	two.sided	0	FALSE	TRUE	3.24007e-176	MA0501.1_MAF::NFE2	MA0501.1	MAF::NFE2	CBD vs. Ctrl
12	2351	643	2994	211407	7.17655e-173	two.sided	0	FALSE	TRUE	2.30846e-171	MA0625.1_NFATC3	MA0625.1	NFATC3	CBD vs. Ctrl
13	2351	643	2994	270534	8.87259e-138	two.sided	0	FALSE	TRUE	2.63448e-136	MA0152.1_NFATC2	MA0152.1	NFATC2	CBD vs. Ctrl
14	643	1431	2074	747013	1.47841e-114	two.sided	0	FALSE	TRUE	5.70667e-112	MA0490.1_JUNB	MA0490.1	JUNB	PSP vs. CBD
15	643	1431	2074	745920	1.06146e-113	two.sided	0	FALSE	TRUE	2.04861e-111	MA0478.1_FOSL2	MA0478.1	FOSL2	PSP vs. CBD
16	643	1431	2074	745361	2.9006e-113	two.sided	0	FALSE	TRUE	2.79908e-111	MA0477.1_FOSL1	MA0477.1	FOSL1	PSP vs. CBD
17	643	1431	2074	745478	2.3506e-113	two.sided	0	FALSE	TRUE	2.79908e-111	MA0501.1_MAF::NFE2	MA0501.1	MAF::NFE2	PSP vs. CBD
18	643	1431	2074	744910	6.51784e-113	two.sided	0	FALSE	TRUE	5.03177e-111	MA0476.1_FOS	MA0476.1	FOS	PSP vs. CBD
19	643	1431	2074	743065	1.76508e-111	two.sided	0	FALSE	TRUE	1.13553e-109	MA0491.1_JUND	MA0491.1	JUND	PSP vs. CBD
20	643	1431	2074	741778	1.74036e-110	two.sided	0	FALSE	TRUE	9.59686e-109	MA0489.1_JUN(var.2)	MA0489.1	JUN(var.2)	PSP vs. CBD
21	643	1431	2074	741551	2.60298e-110	two.sided	0	FALSE	TRUE	1.25594e-108	MA0099.2_FOS::JUN	MA0099.2	FOS::JUN	PSP vs. CBD
22	643	1431	2074	740223	2.72558e-109	two.sided	0	FALSE	TRUE	1.16897e-107	MA0462.1_BATF::JUN	MA0462.1	BATF::JUN	PSP vs. CBD
23	643	1431	2074	737623	2.62127e-107	two.sided	0	FALSE	TRUE	1.01181e-105	MA0841.1_NFE2	MA0841.1	NFE2	PSP vs. CBD
24	643	1431	2074	736835	1.03727e-106	two.sided	0	FALSE	TRUE	3.63988e-105	MA0655.1_JDP2	MA0655.1	JDP2	PSP vs. CBD
25	2351	643	2994	354771	1.00947e-94	two.sided	0	FALSE	TRUE	2.78325e-93	MA0495.1_MAFF	MA0495.1	MAFF	CBD vs. Ctrl
26	2351	1431	3782	1010016	1.2414e-94	two.sided	0	FALSE	TRUE	4.7918e-92	MA0625.1_NFATC3	MA0625.1	NFATC3	PSP vs. Ctrl
27	2351	643	2994	363861	1.45552e-90	two.sided	0	FALSE	TRUE	3.74553e-89	MA0773.1_MEF2D	MA0773.1	MEF2D	CBD vs. Ctrl
28	2351	643	2994	367352	5.43286e-89	two.sided	0	FALSE	TRUE	1.31068e-87	MA0052.3_MEF2A	MA0052.3	MEF2A	CBD vs. Ctrl
29	2351	643	2994	369900	7.47426e-88	two.sided	0	FALSE	TRUE	1.6971e-86	MA0660.1_MEF2B	MA0660.1	MEF2B	CBD vs. Ctrl
30	2351	643	2994	385124	3.31811e-81	two.sided	0	FALSE	TRUE	7.1155e-80	MA0497.1_MEF2C	MA0497.1	MEF2C	CBD vs. Ctrl
31	2351	643	2994	1125375	1.07394e-80	two.sided	0	FALSE	TRUE	2.18179e-79	MA0699.1_LBX2	MA0699.1	LBX2	CBD vs. Ctrl
32	2351	1431	3782	2302594	6.35242e-81	two.sided	0	FALSE	TRUE	1.22602e-78	MA0759.1_ELK3	MA0759.1	ELK3	PSP vs. Ctrl
33	2351	643	2994	393248	9.104e-78	two.sided	0	FALSE	TRUE	1.75707e-76	MA0496.1_MAFK	MA0496.1	MAFK	CBD vs. Ctrl
34	2351	643	2994	395621	8.89747e-77	two.sided	0	FALSE	TRUE	1.63544e-75	MA0472.2_EGR2	MA0472.2	EGR2	CBD vs. Ctrl
35	2351	643	2994	397376	4.75674e-76	two.sided	0	FALSE	TRUE	8.34591e-75	MA0809.1_TEAD4	MA0809.1	TEAD4	CBD vs. Ctrl
36	2351	643	2994	409761	5.18317e-71	two.sided	0	FALSE	TRUE	8.69871e-70	MA0050.2_IRF1	MA0050.2	IRF1	CBD vs. Ctrl
37	2351	1431	3782	2265989	7.16023e-72	two.sided	0	FALSE	TRUE	9.21284e-70	MA0763.1_ETV3	MA0763.1	ETV3	PSP vs. Ctrl
38	2351	1431	3782	2263452	2.89752e-71	two.sided	0	FALSE	TRUE	2.7961e-69	MA0028.2_ELK1	MA0028.2	ELK1	PSP vs. Ctrl
39	2351	643	2994	1095581	1.69601e-68	two.sided	0	FALSE	TRUE	2.72776e-67	MA0892.1_GSX1	MA0892.1	GSX1	CBD vs. Ctrl
40	2351	643	2994	1092691	2.28283e-67	two.sided	0	FALSE	TRUE	3.52469e-66	MA0630.1_SHOX	MA0630.1	SHOX	CBD vs. Ctrl
41	2351	1431	3782	1115990	1.08457e-67	two.sided	0	FALSE	TRUE	8.37286e-66	MA0152.1_NFATC2	MA0152.1	NFATC2	PSP vs. Ctrl
42	2351	643	2994	1086165	7.46027e-65	two.sided	0	FALSE	TRUE	1.10756e-63	MA0889.1_GBX1	MA0889.1	GBX1	CBD vs. Ctrl
43	2351	1431	3782	2238021	2.52608e-65	two.sided	0	FALSE	TRUE	1.62511e-63	MA0761.1_ETV1	MA0761.1	ETV1	PSP vs. Ctrl
44	2351	643	2994	1085211	1.7227e-64	two.sided	0	FALSE	TRUE	2.46283e-63	MA0644.1_ESX1	MA0644.1	ESX1	CBD vs. Ctrl
45	2351	1431	3782	2234286	1.78926e-64	two.sided	0	FALSE	TRUE	9.62897e-63	MA0764.1_ETV4	MA0764.1	ETV4	PSP vs. Ctrl
46	2351	1431	3782	2234077	1.99564e-64	two.sided	0	FALSE	TRUE	9.62897e-63	MA0765.1_ETV5	MA0765.1	ETV5	PSP vs. Ctrl
47	2351	643	2994	1082953	1.23682e-63	two.sided	0	FALSE	TRUE	1.70504e-62	MA0068.2_PAX4	MA0068.2	PAX4	CBD vs. Ctrl
48	2351	643	2994	1080381	1.14901e-62	two.sided	0	FALSE	TRUE	1.52937e-61	MA0700.1_LHX2	MA0700.1	LHX2	CBD vs. Ctrl
49	2351	643	2994	431785	1.72791e-62	two.sided	0	FALSE	TRUE	2.22324e-61	MA0659.1_MAFG	MA0659.1	MAFG	CBD vs. Ctrl
50	2351	643	2994	1078666	5.03012e-62	two.sided	0	FALSE	TRUE	6.26332e-61	MA0710.1_NOTO	MA0710.1	NOTO	CBD vs. Ctrl
51	2351	643	2994	1075081	1.07435e-60	two.sided	0	FALSE	TRUE	1.21971e-59	MA0654.1_ISX	MA0654.1	ISX	CBD vs. Ctrl
52	2351	643	2994	1075081	1.07435e-60	two.sided	0	FALSE	TRUE	1.21971e-59	MA0701.1_LHX9	MA0701.1	LHX9	CBD vs. Ctrl
53	2351	643	2994	1075081	1.07435e-60	two.sided	0	FALSE	TRUE	1.21971e-59	MA0717.1_RAX2	MA0717.1	RAX2	CBD vs. Ctrl
54	2351	643	2994	437915	3.24145e-60	two.sided	0	FALSE	TRUE	3.57485e-59	MA0162.2_EGR1	MA0162.2	EGR1	CBD vs. Ctrl
55	2351	643	2994	438079	3.72361e-60	two.sided	0	FALSE	TRUE	3.99253e-59	MA0808.1_TEAD3	MA0808.1	TEAD3	CBD vs. Ctrl
56	2351	643	2994	1073392	4.49199e-60	two.sided	0	FALSE	TRUE	4.68624e-59	MA0893.1_GSX2	MA0893.1	GSX2	CBD vs. Ctrl
57	2351	643	2994	1072268	1.159e-59	two.sided	0	FALSE	TRUE	1.1773e-58	MA0890.1_GBX2	MA0890.1	GBX2	CBD vs. Ctrl
58	2351	643	2994	1071476	2.25564e-59	two.sided	0	FALSE	TRUE	2.23251e-58	MA0027.2_EN1	MA0027.2	EN1	CBD vs. Ctrl
59	2351	643	2994	1071253	2.71998e-59	two.sided	0	FALSE	TRUE	2.49979e-58	MA0702.1_LMX1A	MA0702.1	LMX1A	CBD vs. Ctrl
60	2351	643	2994	1071253	2.71998e-59	two.sided	0	FALSE	TRUE	2.49979e-58	MA0716.1_PRRX1	MA0716.1	PRRX1	CBD vs. Ctrl
61	2351	643	2994	1071253	2.71998e-59	two.sided	0	FALSE	TRUE	2.49979e-58	MA0721.1_UNCX	MA0721.1	UNCX	CBD vs. Ctrl
62	2351	643	2994	440975	4.25959e-59	two.sided	0	FALSE	TRUE	3.82372e-58	MA0488.1_JUN	MA0488.1	JUN	CBD vs. Ctrl
63	2351	643	2994	442666	1.74957e-58	two.sided	0	FALSE	TRUE	1.53485e-57	MA0090.2_TEAD1	MA0090.2	TEAD1	CBD vs. Ctrl
64	2351	1431	3782	1155849	9.5928e-59	two.sided	0	FALSE	TRUE	4.11424e-57	MA0773.1_MEF2D	MA0773.1	MEF2D	PSP vs. Ctrl
65	2351	643	2994	444804	1.03274e-57	two.sided	0	FALSE	TRUE	8.85862e-57	MA0833.1_ATF4	MA0833.1	ATF4	CBD vs. Ctrl
66	2351	643	2994	1065875	2.387e-57	two.sided	0	FALSE	TRUE	2.00301e-56	MA0661.1_MEOX1	MA0661.1	MEOX1	CBD vs. Ctrl
67	2351	643	2994	1061757	6.9732e-56	two.sided	0	FALSE	TRUE	5.49317e-55	MA0666.1_MSX1	MA0666.1	MSX1	CBD vs. Ctrl
68	2351	643	2994	1061757	6.9732e-56	two.sided	0	FALSE	TRUE	5.49317e-55	MA0708.1_MSX2	MA0708.1	MSX2	CBD vs. Ctrl
69	2351	643	2994	1061757	6.9732e-56	two.sided	0	FALSE	TRUE	5.49317e-55	MA0876.1_BSX	MA0876.1	BSX	CBD vs. Ctrl
70	2351	1431	3782	2192584	2.28594e-55	two.sided	0	FALSE	TRUE	8.82374e-54	MA0156.2_FEV	MA0156.2	FEV	PSP vs. Ctrl
71	2351	643	2994	1057245	2.67246e-54	two.sided	0	FALSE	TRUE	2.06314e-53	MA0886.1_EMX2	MA0886.1	EMX2	CBD vs. Ctrl
72	2351	1431	3782	2189279	1.12314e-54	two.sided	0	FALSE	TRUE	3.94119e-53	MA0098.3_ETS1	MA0098.3	ETS1	PSP vs. Ctrl
73	2351	1431	3782	2188387	1.72292e-54	two.sided	0	FALSE	TRUE	5.54206e-53	MA0699.1_LBX2	MA0699.1	LBX2	PSP vs. Ctrl
74	2351	643	2994	1054711	2.02293e-53	two.sided	0	FALSE	TRUE	1.53108e-52	MA0894.1_HESX1	MA0894.1	HESX1	CBD vs. Ctrl
75	2351	643	2994	459382	1.35449e-52	two.sided	0	FALSE	TRUE	1.00545e-51	MA0732.1_EGR3	MA0732.1	EGR3	CBD vs. Ctrl
76	2351	643	2994	459953	2.12459e-52	two.sided	0	FALSE	TRUE	1.54734e-51	MA0782.1_PKNOX1	MA0782.1	PKNOX1	CBD vs. Ctrl
77	2351	643	2994	1051376	2.82947e-52	two.sided	0	FALSE	TRUE	2.02255e-51	MA0634.1_ALX3	MA0634.1	ALX3	CBD vs. Ctrl
78	2351	1431	3782	1184396	9.79991e-53	two.sided	0	FALSE	TRUE	2.90982e-51	MA0660.1_MEF2B	MA0660.1	MEF2B	PSP vs. Ctrl
79	2351	643	2994	1050523	5.52972e-52	two.sided	0	FALSE	TRUE	3.88086e-51	MA0132.2_PDX1	MA0132.2	PDX1	CBD vs. Ctrl
80	2351	1431	3782	1187851	4.96557e-52	two.sided	0	FALSE	TRUE	1.36908e-50	MA0491.1_JUND	MA0491.1	JUND	PSP vs. Ctrl
81	2351	1431	3782	1190402	1.63379e-51	two.sided	0	FALSE	TRUE	4.20429e-50	MA0052.3_MEF2A	MA0052.3	MEF2A	PSP vs. Ctrl
82	2351	643	2994	1046206	1.59455e-50	two.sided	0	FALSE	TRUE	1.0991e-49	MA0642.1_EN2	MA0642.1	EN2	CBD vs. Ctrl
83	2351	1431	3782	2170373	8.31236e-51	two.sided	0	FALSE	TRUE	2.00536e-49	MA0889.1_GBX1	MA0889.1	GBX1	PSP vs. Ctrl
84	2351	643	2994	1045364	3.0542e-50	two.sided	0	FALSE	TRUE	2.03262e-49	MA0674.1_NKX6-1	MA0674.1	NKX6-1	CBD vs. Ctrl
85	2351	643	2994	1045364	3.0542e-50	two.sided	0	FALSE	TRUE	2.03262e-49	MA0675.1_NKX6-2	MA0675.1	NKX6-2	CBD vs. Ctrl
86	643	1431	2074	270753	6.46115e-51	two.sided	0	FALSE	TRUE	2.07834e-49	MA0139.1_CTCF	MA0139.1	CTCF	PSP vs. CBD
87	2351	1431	3782	2168381	2.0841e-50	two.sided	0	FALSE	TRUE	4.73214e-49	MA0760.1_ERF	MA0760.1	ERF	PSP vs. Ctrl
88	2351	1431	3782	1197316	3.99669e-50	two.sided	0	FALSE	TRUE	8.57067e-49	MA0478.1_FOSL2	MA0478.1	FOSL2	PSP vs. Ctrl
89	2351	1431	3782	1199365	1.02199e-49	two.sided	0	FALSE	TRUE	1.97244e-48	MA0476.1_FOS	MA0476.1	FOS	PSP vs. Ctrl
90	2351	1431	3782	2165015	9.76754e-50	two.sided	0	FALSE	TRUE	1.97244e-48	MA0076.2_ELK4	MA0076.2	ELK4	PSP vs. Ctrl
91	2351	1431	3782	1199578	1.12651e-49	two.sided	0	FALSE	TRUE	2.07063e-48	MA0841.1_NFE2	MA0841.1	NFE2	PSP vs. Ctrl
92	2351	643	2994	469881	4.64172e-49	two.sided	0	FALSE	TRUE	3.03678e-48	MA0842.1_NRL	MA0842.1	NRL	CBD vs. Ctrl
93	2351	643	2994	471217	1.28066e-48	two.sided	0	FALSE	TRUE	8.23894e-48	MA0107.1_RELA	MA0107.1	RELA	CBD vs. Ctrl
94	2351	1431	3782	1202814	4.91955e-49	two.sided	0	FALSE	TRUE	8.63157e-48	MA0477.1_FOSL1	MA0477.1	FOSL1	PSP vs. Ctrl
95	2351	643	2994	1040045	1.77496e-48	two.sided	0	FALSE	TRUE	1.12317e-47	MA0718.1_RAX	MA0718.1	RAX	CBD vs. Ctrl
96	2351	1431	3782	1203557	6.89149e-49	two.sided	0	FALSE	TRUE	1.15657e-47	MA0489.1_JUN(var.2)	MA0489.1	JUN(var.2)	PSP vs. Ctrl
97	2351	1431	3782	2160290	8.38913e-49	two.sided	0	FALSE	TRUE	1.34925e-47	MA0890.1_GBX2	MA0890.1	GBX2	PSP vs. Ctrl
98	2351	643	2994	474554	1.58272e-47	two.sided	0	FALSE	TRUE	9.8537e-47	MA0783.1_PKNOX2	MA0783.1	PKNOX2	CBD vs. Ctrl
99	2351	1431	3782	1208769	7.22554e-48	two.sided	0	FALSE	TRUE	1.11562e-46	MA0497.1_MEF2C	MA0497.1	MEF2C	PSP vs. Ctrl
100	2351	1431	3782	2155222	8.22867e-48	two.sided	0	FALSE	TRUE	1.22164e-46	MA0475.2_FLI1	MA0475.2	FLI1	PSP vs. Ctrl
101	2351	643	2994	1034708	9.70216e-47	two.sided	0	FALSE	TRUE	5.9445e-46	MA0612.1_EMX1	MA0612.1	EMX1	CBD vs. Ctrl
102	2351	643	2994	1034517	1.11803e-46	two.sided	0	FALSE	TRUE	6.74309e-46	MA0902.1_HOXB2	MA0902.1	HOXB2	CBD vs. Ctrl
103	2351	1431	3782	1213153	5.11356e-47	two.sided	0	FALSE	TRUE	7.3105e-46	MA0462.1_BATF::JUN	MA0462.1	BATF::JUN	PSP vs. Ctrl
104	2351	1431	3782	1213704	6.53104e-47	two.sided	0	FALSE	TRUE	9.00351e-46	MA0490.1_JUNB	MA0490.1	JUNB	PSP vs. Ctrl
105	2351	643	2994	1033148	3.08054e-46	two.sided	0	FALSE	TRUE	1.82937e-45	MA0639.1_DBP	MA0639.1	DBP	CBD vs. Ctrl
106	2351	643	2994	1032089	6.72443e-46	two.sided	0	FALSE	TRUE	3.87407e-45	MA0658.1_LHX6	MA0658.1	LHX6	CBD vs. Ctrl
107	2351	643	2994	1032100	6.67022e-46	two.sided	0	FALSE	TRUE	3.87407e-45	MA0662.1_MIXL1	MA0662.1	MIXL1	CBD vs. Ctrl
108	2351	643	2994	1030659	1.92051e-45	two.sided	0	FALSE	TRUE	1.09017e-44	MA0900.1_HOXA2	MA0900.1	HOXA2	CBD vs. Ctrl
109	2351	643	2994	481777	3.30595e-45	two.sided	0	FALSE	TRUE	1.84942e-44	MA0733.1_EGR4	MA0733.1	EGR4	CBD vs. Ctrl
110	2351	1431	3782	2142950	1.87552e-45	two.sided	0	FALSE	TRUE	2.49638e-44	MA0892.1_GSX1	MA0892.1	GSX1	PSP vs. Ctrl
111	2351	643	2994	1028707	7.97565e-45	two.sided	0	FALSE	TRUE	4.398e-44	MA0843.1_TEF	MA0843.1	TEF	CBD vs. Ctrl
112	2351	1431	3782	2141123	4.15806e-45	two.sided	0	FALSE	TRUE	5.35004e-44	MA0700.1_LHX2	MA0700.1	LHX2	PSP vs. Ctrl
113	2351	643	2994	484967	3.34842e-44	two.sided	0	FALSE	TRUE	1.82041e-43	MA0797.1_TGIF2	MA0797.1	TGIF2	CBD vs. Ctrl
114	2351	1431	3782	2136424	3.17652e-44	two.sided	0	FALSE	TRUE	3.95528e-43	MA0644.1_ESX1	MA0644.1	ESX1	PSP vs. Ctrl
115	2351	643	2994	1025333	9.12601e-44	two.sided	0	FALSE	TRUE	4.89256e-43	MA0888.1_EVX2	MA0888.1	EVX2	CBD vs. Ctrl
116	2351	643	2994	486968	1.41137e-43	two.sided	0	FALSE	TRUE	7.46286e-43	MA0492.1_JUND(var.2)	MA0492.1	JUND(var.2)	CBD vs. Ctrl
117	2351	1431	3782	1232430	2.25267e-43	two.sided	0	FALSE	TRUE	2.71728e-42	MA0099.2_FOS::JUN	MA0099.2	FOS::JUN	PSP vs. Ctrl
118	2351	1431	3782	2130839	3.46589e-43	two.sided	0	FALSE	TRUE	4.05404e-42	MA0068.2_PAX4	MA0068.2	PAX4	PSP vs. Ctrl
119	2351	643	2994	1021453	1.45019e-42	two.sided	0	FALSE	TRUE	7.56451e-42	MA0618.1_LBX1	MA0618.1	LBX1	CBD vs. Ctrl
120	2351	643	2994	492146	5.56105e-42	two.sided	0	FALSE	TRUE	2.86209e-41	MA0102.3_CEBPA	MA0102.3	CEBPA	CBD vs. Ctrl
121	2351	643	2994	492750	8.49709e-42	two.sided	0	FALSE	TRUE	4.31563e-41	MA0101.1_REL	MA0101.1	REL	CBD vs. Ctrl
122	2351	643	2994	492838	9.03774e-42	two.sided	0	FALSE	TRUE	4.53061e-41	MA0481.1_FOXP1	MA0481.1	FOXP1	CBD vs. Ctrl
123	2351	643	2994	493884	1.8785e-41	two.sided	0	FALSE	TRUE	9.29618e-41	MA0103.2_ZEB1	MA0103.2	ZEB1	CBD vs. Ctrl
124	2351	1431	3782	2123270	8.43497e-42	two.sided	0	FALSE	TRUE	9.57617e-41	MA0474.2_ERG	MA0474.2	ERG	PSP vs. Ctrl
125	2351	1431	3782	2119729	3.68645e-41	two.sided	0	FALSE	TRUE	4.06563e-40	MA0642.1_EN2	MA0642.1	EN2	PSP vs. Ctrl
126	2351	643	2994	497125	1.77993e-40	two.sided	0	FALSE	TRUE	8.69685e-40	MA0698.1_ZBTB18	MA0698.1	ZBTB18	CBD vs. Ctrl
127	2351	1431	3782	2117485	9.32992e-41	two.sided	0	FALSE	TRUE	1.00038e-39	MA0710.1_NOTO	MA0710.1	NOTO	PSP vs. Ctrl
128	2351	643	2994	1013624	3.40871e-40	two.sided	0	FALSE	TRUE	1.6447e-39	MA0903.1_HOXB3	MA0903.1	HOXB3	CBD vs. Ctrl
129	2351	1431	3782	2109599	2.34858e-39	two.sided	0	FALSE	TRUE	2.32449e-38	MA0654.1_ISX	MA0654.1	ISX	PSP vs. Ctrl
130	2351	1431	3782	2109599	2.34858e-39	two.sided	0	FALSE	TRUE	2.32449e-38	MA0701.1_LHX9	MA0701.1	LHX9	PSP vs. Ctrl
131	2351	1431	3782	2109599	2.34858e-39	two.sided	0	FALSE	TRUE	2.32449e-38	MA0717.1_RAX2	MA0717.1	RAX2	PSP vs. Ctrl
132	2351	1431	3782	2109298	2.65323e-39	two.sided	0	FALSE	TRUE	2.56037e-38	MA0027.2_EN1	MA0027.2	EN1	PSP vs. Ctrl
133	2351	643	2994	504770	3.20913e-38	two.sided	0	FALSE	TRUE	1.52929e-37	MA0014.2_PAX5	MA0014.2	PAX5	CBD vs. Ctrl
134	2351	1431	3782	2104094	2.15648e-38	two.sided	0	FALSE	TRUE	2.03025e-37	MA0612.1_EMX1	MA0612.1	EMX1	PSP vs. Ctrl
135	2351	643	2994	506405	9.55393e-38	two.sided	0	FALSE	TRUE	4.44315e-37	MA0801.1_MGA	MA0801.1	MGA	CBD vs. Ctrl
136	2351	643	2994	506405	9.55393e-38	two.sided	0	FALSE	TRUE	4.44315e-37	MA0803.1_TBX15	MA0803.1	TBX15	CBD vs. Ctrl
137	643	1431	2074	623666	1.81246e-38	two.sided	0	FALSE	TRUE	5.38163e-37	MA0488.1_JUN	MA0488.1	JUN	PSP vs. CBD
138	2351	1431	3782	2100472	9.1323e-38	two.sided	0	FALSE	TRUE	8.39302e-37	MA0473.2_ELF1	MA0473.2	ELF1	PSP vs. Ctrl
139	2351	1431	3782	2097132	3.41883e-37	two.sided	0	FALSE	TRUE	3.069e-36	MA0894.1_HESX1	MA0894.1	HESX1	PSP vs. Ctrl
140	643	1431	2074	621061	2.6253e-37	two.sided	0	FALSE	TRUE	7.23834e-36	MA0625.1_NFATC3	MA0625.1	NFATC3	PSP vs. CBD
141	2351	643	2994	511437	2.62526e-36	two.sided	0	FALSE	TRUE	1.20637e-35	MA0835.1_BATF3	MA0835.1	BATF3	CBD vs. Ctrl
142	2351	643	2994	998897	6.35089e-36	two.sided	0	FALSE	TRUE	2.85051e-35	MA0722.1_VAX1	MA0722.1	VAX1	CBD vs. Ctrl
143	2351	643	2994	998897	6.35089e-36	two.sided	0	FALSE	TRUE	2.85051e-35	MA0723.1_VAX2	MA0723.1	VAX2	CBD vs. Ctrl
144	2351	643	2994	513001	7.25312e-36	two.sided	0	FALSE	TRUE	3.18148e-35	MA0806.1_TBX4	MA0806.1	TBX4	CBD vs. Ctrl
145	2351	643	2994	513001	7.25312e-36	two.sided	0	FALSE	TRUE	3.18148e-35	MA0807.1_TBX5	MA0807.1	TBX5	CBD vs. Ctrl
146	2351	1431	3782	1273453	4.01385e-36	two.sided	0	FALSE	TRUE	3.52124e-35	MA0050.2_IRF1	MA0050.2	IRF1	PSP vs. Ctrl
147	2351	643	2994	513349	9.08548e-36	two.sided	0	FALSE	TRUE	3.94045e-35	MA0824.1_ID4	MA0824.1	ID4	CBD vs. Ctrl
148	2351	1431	3782	2090127	5.26635e-36	two.sided	0	FALSE	TRUE	4.32513e-35	MA0666.1_MSX1	MA0666.1	MSX1	PSP vs. Ctrl
149	2351	1431	3782	2090127	5.26635e-36	two.sided	0	FALSE	TRUE	4.32513e-35	MA0708.1_MSX2	MA0708.1	MSX2	PSP vs. Ctrl
150	2351	1431	3782	2090127	5.26635e-36	two.sided	0	FALSE	TRUE	4.32513e-35	MA0876.1_BSX	MA0876.1	BSX	PSP vs. Ctrl
151	643	1431	2074	619223	1.68733e-36	two.sided	0	FALSE	TRUE	4.34206e-35	MA0526.1_USF2	MA0526.1	USF2	PSP vs. CBD
152	2351	1431	3782	2084754	4.15832e-35	two.sided	0	FALSE	TRUE	3.34398e-34	MA0645.1_ETV6	MA0645.1	ETV6	PSP vs. Ctrl
153	643	1431	2074	616820	1.86114e-35	two.sided	0	FALSE	TRUE	4.49e-34	MA0495.1_MAFF	MA0495.1	MAFF	PSP vs. CBD
154	2351	1431	3782	2082656	9.24997e-35	two.sided	0	FALSE	TRUE	7.28671e-34	MA0630.1_SHOX	MA0630.1	SHOX	PSP vs. Ctrl
155	2351	1431	3782	2082051	1.16395e-34	two.sided	0	FALSE	TRUE	8.98573e-34	MA0658.1_LHX6	MA0658.1	LHX6	PSP vs. Ctrl
156	2351	643	2994	518700	2.78662e-34	two.sided	0	FALSE	TRUE	1.19515e-33	MA0517.1_STAT1::STAT2	MA0517.1	STAT1::STAT2	CBD vs. Ctrl
157	643	1431	2074	615185	9.33675e-35	two.sided	0	FALSE	TRUE	2.11999e-33	MA0833.1_ATF4	MA0833.1	ATF4	PSP vs. CBD
158	2351	1431	3782	2078370	4.67643e-34	two.sided	0	FALSE	TRUE	3.53942e-33	MA0095.2_YY1	MA0095.2	YY1	PSP vs. Ctrl
159	2351	1431	3782	2077499	6.48667e-34	two.sided	0	FALSE	TRUE	4.8151e-33	MA0132.2_PDX1	MA0132.2	PDX1	PSP vs. Ctrl
160	2351	1431	3782	1288504	1.23613e-33	two.sided	0	FALSE	TRUE	9.00277e-33	MA0830.1_TCF4	MA0830.1	TCF4	PSP vs. Ctrl
161	2351	1431	3782	2075633	1.30445e-33	two.sided	0	FALSE	TRUE	9.32442e-33	MA0886.1_EMX2	MA0886.1	EMX2	PSP vs. Ctrl
162	2351	1431	3782	1288851	1.40718e-33	two.sided	0	FALSE	TRUE	9.87585e-33	MA0824.1_ID4	MA0824.1	ID4	PSP vs. Ctrl
163	2351	1431	3782	2075253	1.50329e-33	two.sided	0	FALSE	TRUE	1.03619e-32	MA0718.1_RAX	MA0718.1	RAX	PSP vs. Ctrl
164	2351	643	2994	523768	6.65248e-33	two.sided	0	FALSE	TRUE	2.82182e-32	MA0805.1_TBX1	MA0805.1	TBX1	CBD vs. Ctrl
165	2351	1431	3782	1291801	4.21579e-33	two.sided	0	FALSE	TRUE	2.8549e-32	MA0655.1_JDP2	MA0655.1	JDP2	PSP vs. Ctrl
166	2351	643	2994	987838	7.02071e-33	two.sided	0	FALSE	TRUE	2.94565e-32	MA0703.1_LMX1B	MA0703.1	LMX1B	CBD vs. Ctrl
167	2351	643	2994	524435	1.00495e-32	two.sided	0	FALSE	TRUE	4.17107e-32	MA0689.1_TBX20	MA0689.1	TBX20	CBD vs. Ctrl
168	2351	643	2994	983859	8.07664e-32	two.sided	0	FALSE	TRUE	3.31658e-31	MA0628.1_POU6F1	MA0628.1	POU6F1	CBD vs. Ctrl
169	2351	1431	3782	2064462	7.98333e-32	two.sided	0	FALSE	TRUE	5.31304e-31	MA0161.1_NFIC	MA0161.1	NFIC	PSP vs. Ctrl
170	2351	1431	3782	2064328	8.38125e-32	two.sided	0	FALSE	TRUE	5.48333e-31	MA0661.1_MEOX1	MA0661.1	MEOX1	PSP vs. Ctrl
171	643	1431	2074	608728	4.62869e-32	two.sided	0	FALSE	TRUE	9.92596e-31	MA0492.1_JUND(var.2)	MA0492.1	JUND(var.2)	PSP vs. CBD
172	2351	643	2994	981555	3.2601e-31	two.sided	0	FALSE	TRUE	1.32463e-30	MA0060.2_NFYA	MA0060.2	NFYA	CBD vs. Ctrl
173	2351	643	2994	530536	4.14285e-31	two.sided	0	FALSE	TRUE	1.66577e-30	MA0690.1_TBX21	MA0690.1	TBX21	CBD vs. Ctrl
174	2351	643	2994	981106	4.2719e-31	two.sided	0	FALSE	TRUE	1.69995e-30	MA0707.1_MNX1	MA0707.1	MNX1	CBD vs. Ctrl
175	2351	643	2994	531101	5.81732e-31	two.sided	0	FALSE	TRUE	2.29131e-30	MA0130.1_ZNF354C	MA0130.1	ZNF354C	CBD vs. Ctrl
176	2351	1431	3782	2059275	5.18288e-31	two.sided	0	FALSE	TRUE	3.33432e-30	MA0641.1_ELF4	MA0641.1	ELF4	PSP vs. Ctrl
177	2351	643	2994	978406	2.14621e-30	two.sided	0	FALSE	TRUE	8.28437e-30	MA0725.1_VSX1	MA0725.1	VSX1	CBD vs. Ctrl
178	2351	643	2994	978406	2.14621e-30	two.sided	0	FALSE	TRUE	8.28437e-30	MA0726.1_VSX2	MA0726.1	VSX2	CBD vs. Ctrl
179	643	1431	2074	605723	7.60772e-31	two.sided	0	FALSE	TRUE	1.54557e-29	MA0808.1_TEAD3	MA0808.1	TEAD3	PSP vs. CBD
180	2351	643	2994	535163	6.5143e-30	two.sided	0	FALSE	TRUE	2.48962e-29	MA0079.3_SP1	MA0079.3	SP1	CBD vs. Ctrl
181	643	1431	2074	605044	1.42096e-30	two.sided	0	FALSE	TRUE	2.74246e-29	MA0152.1_NFATC2	MA0152.1	NFATC2	PSP vs. CBD
182	643	1431	2074	604901	1.62019e-30	two.sided	0	FALSE	TRUE	2.97806e-29	MA0093.2_USF1	MA0093.2	USF1	PSP vs. CBD
183	2351	1431	3782	2052784	5.19735e-30	two.sided	0	FALSE	TRUE	3.28881e-29	MA0902.1_HOXB2	MA0902.1	HOXB2	PSP vs. Ctrl
184	2351	1431	3782	2051363	8.56407e-30	two.sided	0	FALSE	TRUE	5.33182e-29	MA0900.1_HOXA2	MA0900.1	HOXA2	PSP vs. Ctrl
185	2351	643	2994	536909	1.81567e-29	two.sided	0	FALSE	TRUE	6.87105e-29	MA0516.1_SP2	MA0516.1	SP2	CBD vs. Ctrl
186	2351	1431	3782	2050517	1.15192e-29	two.sided	0	FALSE	TRUE	6.94751e-29	MA0674.1_NKX6-1	MA0674.1	NKX6-1	PSP vs. Ctrl
187	2351	1431	3782	2050517	1.15192e-29	two.sided	0	FALSE	TRUE	6.94751e-29	MA0675.1_NKX6-2	MA0675.1	NKX6-2	PSP vs. Ctrl
188	2351	643	2994	536968	1.8794e-29	two.sided	0	FALSE	TRUE	7.04317e-29	MA0596.1_SREBF2	MA0596.1	SREBF2	CBD vs. Ctrl
189	643	1431	2074	603245	7.33536e-30	two.sided	0	FALSE	TRUE	1.28702e-28	MA0809.1_TEAD4	MA0809.1	TEAD4	PSP vs. CBD
190	2351	643	2994	973594	3.63453e-29	two.sided	0	FALSE	TRUE	1.34897e-28	MA0759.1_ELK3	MA0759.1	ELK3	CBD vs. Ctrl
191	643	1431	2074	602506	1.43121e-29	two.sided	0	FALSE	TRUE	2.40194e-28	MA0102.3_CEBPA	MA0102.3	CEBPA	PSP vs. CBD
192	2351	643	2994	540558	1.50716e-28	two.sided	0	FALSE	TRUE	5.54059e-28	MA0595.1_SREBF1	MA0595.1	SREBF1	CBD vs. Ctrl
193	2351	1431	3782	2042917	1.60297e-28	two.sided	0	FALSE	TRUE	9.51918e-28	MA0893.1_GSX2	MA0893.1	GSX2	PSP vs. Ctrl
194	2351	1431	3782	2042432	1.89279e-28	two.sided	0	FALSE	TRUE	1.107e-27	MA0748.1_YY2	MA0748.1	YY2	PSP vs. Ctrl
195	2351	1431	3782	2040401	3.78717e-28	two.sided	0	FALSE	TRUE	2.18186e-27	MA0888.1_EVX2	MA0888.1	EVX2	PSP vs. Ctrl
196	643	1431	2074	599684	1.78067e-28	two.sided	0	FALSE	TRUE	2.86391e-27	MA0162.2_EGR1	MA0162.2	EGR1	PSP vs. CBD
197	643	1431	2074	599280	2.54427e-28	two.sided	0	FALSE	TRUE	3.92835e-27	MA0496.1_MAFK	MA0496.1	MAFK	PSP vs. CBD
198	2351	1431	3782	2036465	1.43642e-27	two.sided	0	FALSE	TRUE	8.1538e-27	MA0903.1_HOXB3	MA0903.1	HOXB3	PSP vs. Ctrl
199	2351	643	2994	546202	3.71395e-27	two.sided	0	FALSE	TRUE	1.35244e-26	MA0796.1_TGIF1	MA0796.1	TGIF1	CBD vs. Ctrl
200	2351	643	2994	546577	4.58156e-27	two.sided	0	FALSE	TRUE	1.65279e-26	MA0691.1_TFAP4	MA0691.1	TFAP4	CBD vs. Ctrl
201	2351	643	2994	547411	7.29822e-27	two.sided	0	FALSE	TRUE	2.60844e-26	MA0746.1_SP3	MA0746.1	SP3	CBD vs. Ctrl
202	2351	643	2994	547693	8.53902e-27	two.sided	0	FALSE	TRUE	3.02391e-26	MA0513.1_SMAD2::SMAD3::SMAD4	MA0513.1	SMAD2::SMAD3::SMAD4	CBD vs. Ctrl
203	2351	643	2994	962783	1.67746e-26	two.sided	0	FALSE	TRUE	5.88637e-26	MA0706.1_MEOX2	MA0706.1	MEOX2	CBD vs. Ctrl
204	2351	643	2994	549108	1.87156e-26	two.sided	0	FALSE	TRUE	6.5083e-26	MA0772.1_IRF7	MA0772.1	IRF7	CBD vs. Ctrl
205	2351	643	2994	549515	2.34317e-26	two.sided	0	FALSE	TRUE	8.07556e-26	MA0745.1_SNAI2	MA0745.1	SNAI2	CBD vs. Ctrl
206	2351	643	2994	549937	2.95666e-26	two.sided	0	FALSE	TRUE	1.00997e-25	MA0838.1_CEBPG	MA0838.1	CEBPG	CBD vs. Ctrl
207	2351	643	2994	550164	3.35001e-26	two.sided	0	FALSE	TRUE	1.1343e-25	MA0697.1_ZIC3	MA0697.1	ZIC3	CBD vs. Ctrl
208	2351	1431	3782	1336255	2.38457e-26	two.sided	0	FALSE	TRUE	1.33398e-25	MA0501.1_MAF::NFE2	MA0501.1	MAF::NFE2	PSP vs. Ctrl
209	2351	1431	3782	1338386	4.79669e-26	two.sided	0	FALSE	TRUE	2.64503e-25	MA0522.2_TCF3	MA0522.2	TCF3	PSP vs. Ctrl
210	2351	643	2994	551970	9.00563e-26	two.sided	0	FALSE	TRUE	3.02276e-25	MA0083.3_SRF	MA0083.3	SRF	CBD vs. Ctrl
211	2351	1431	3782	1339090	6.03686e-26	two.sided	0	FALSE	TRUE	3.28201e-25	MA0698.1_ZBTB18	MA0698.1	ZBTB18	PSP vs. Ctrl
212	2351	643	2994	958768	1.51394e-25	two.sided	0	FALSE	TRUE	5.03778e-25	MA0502.1_NFYB	MA0502.1	NFYB	CBD vs. Ctrl
213	2351	1431	3782	1342072	1.59077e-25	two.sided	0	FALSE	TRUE	8.52831e-25	MA0745.1_SNAI2	MA0745.1	SNAI2	PSP vs. Ctrl
214	2351	1431	3782	2021233	2.18047e-25	two.sided	0	FALSE	TRUE	1.15296e-24	MA0628.1_POU6F1	MA0628.1	POU6F1	PSP vs. Ctrl
215	2351	1431	3782	2021036	2.32351e-25	two.sided	0	FALSE	TRUE	1.1801e-24	MA0702.1_LMX1A	MA0702.1	LMX1A	PSP vs. Ctrl
216	2351	1431	3782	2021036	2.32351e-25	two.sided	0	FALSE	TRUE	1.1801e-24	MA0716.1_PRRX1	MA0716.1	PRRX1	PSP vs. Ctrl
217	2351	1431	3782	2021036	2.32351e-25	two.sided	0	FALSE	TRUE	1.1801e-24	MA0721.1_UNCX	MA0721.1	UNCX	PSP vs. Ctrl
218	2351	643	2994	956485	5.19034e-25	two.sided	0	FALSE	TRUE	1.71237e-24	MA0028.2_ELK1	MA0028.2	ELK1	CBD vs. Ctrl
219	2351	643	2994	555536	6.18847e-25	two.sided	0	FALSE	TRUE	2.02436e-24	MA0696.1_ZIC1	MA0696.1	ZIC1	CBD vs. Ctrl
220	2351	1431	3782	2017228	7.87841e-25	two.sided	0	FALSE	TRUE	3.94944e-24	MA0618.1_LBX1	MA0618.1	LBX1	PSP vs. Ctrl
221	2351	643	2994	557843	2.11539e-24	two.sided	0	FALSE	TRUE	6.86168e-24	MA0830.1_TCF4	MA0830.1	TCF4	CBD vs. Ctrl
222	643	1431	2074	590394	5.04181e-25	two.sided	0	FALSE	TRUE	7.48515e-24	MA0090.2_TEAD1	MA0090.2	TEAD1	PSP vs. CBD
223	2351	643	2994	558991	3.87935e-24	two.sided	0	FALSE	TRUE	1.24786e-23	MA0839.1_CREB3L1	MA0839.1	CREB3L1	CBD vs. Ctrl
224	2351	643	2994	952021	5.54985e-24	two.sided	0	FALSE	TRUE	1.77045e-23	MA0043.2_HLF	MA0043.2	HLF	CBD vs. Ctrl
225	2351	643	2994	951532	7.17181e-24	two.sided	0	FALSE	TRUE	2.26911e-23	MA0764.1_ETV4	MA0764.1	ETV4	CBD vs. Ctrl
226	2351	1431	3782	1352726	4.73737e-24	two.sided	0	FALSE	TRUE	2.34439e-23	MA0470.1_E2F4	MA0470.1	E2F4	PSP vs. Ctrl
227	2351	1431	3782	1353118	5.35661e-24	two.sided	0	FALSE	TRUE	2.61728e-23	MA0732.1_EGR3	MA0732.1	EGR3	PSP vs. Ctrl
228	2351	643	2994	560604	9.04205e-24	two.sided	0	FALSE	TRUE	2.83759e-23	MA0112.3_ESR1	MA0112.3	ESR1	CBD vs. Ctrl
229	2351	643	2994	561556	1.48518e-23	two.sided	0	FALSE	TRUE	4.62322e-23	MA0471.1_E2F6	MA0471.1	E2F6	CBD vs. Ctrl
230	2351	643	2994	949862	1.71333e-23	two.sided	0	FALSE	TRUE	5.29076e-23	MA0887.1_EVX1	MA0887.1	EVX1	CBD vs. Ctrl
231	643	1431	2074	587743	4.41388e-24	two.sided	0	FALSE	TRUE	6.31021e-23	MA0659.1_MAFG	MA0659.1	MAFG	PSP vs. CBD
232	2351	643	2994	563279	3.62412e-23	two.sided	0	FALSE	TRUE	1.11024e-22	MA0844.1_XBP1	MA0844.1	XBP1	CBD vs. Ctrl
233	2351	1431	3782	1358449	2.80719e-23	two.sided	0	FALSE	TRUE	1.33775e-22	MA0806.1_TBX4	MA0806.1	TBX4	PSP vs. Ctrl
234	2351	1431	3782	1358449	2.80719e-23	two.sided	0	FALSE	TRUE	1.33775e-22	MA0807.1_TBX5	MA0807.1	TBX5	PSP vs. Ctrl
235	2351	1431	3782	2003200	6.29786e-23	two.sided	0	FALSE	TRUE	2.9646e-22	MA0793.1_POU6F2	MA0793.1	POU6F2	PSP vs. Ctrl
236	2351	643	2994	946158	1.15174e-22	two.sided	0	FALSE	TRUE	3.50057e-22	MA0882.1_DLX6	MA0882.1	DLX6	CBD vs. Ctrl
237	2351	643	2994	565613	1.19843e-22	two.sided	0	FALSE	TRUE	3.61402e-22	MA0526.1_USF2	MA0526.1	USF2	CBD vs. Ctrl
238	2351	643	2994	566763	2.14908e-22	two.sided	0	FALSE	TRUE	6.43057e-22	MA0656.1_JDP2(var.2)	MA0656.1	JDP2(var.2)	CBD vs. Ctrl
239	2351	1431	3782	2000032	1.6514e-22	two.sided	0	FALSE	TRUE	7.67999e-22	MA0762.1_ETV2	MA0762.1	ETV2	PSP vs. Ctrl
240	2351	643	2994	567440	3.02596e-22	two.sided	0	FALSE	TRUE	8.98477e-22	MA0081.1_SPIB	MA0081.1	SPIB	CBD vs. Ctrl
241	2351	643	2994	943915	3.58809e-22	two.sided	0	FALSE	TRUE	1.05725e-21	MA0765.1_ETV5	MA0765.1	ETV5	CBD vs. Ctrl
242	2351	643	2994	568089	4.19602e-22	two.sided	0	FALSE	TRUE	1.22702e-21	MA0466.2_CEBPB	MA0466.2	CEBPB	CBD vs. Ctrl
243	643	1431	2074	582708	2.41028e-22	two.sided	0	FALSE	TRUE	3.32274e-21	MA0838.1_CEBPG	MA0838.1	CEBPG	PSP vs. CBD
244	2351	643	2994	941502	1.20053e-21	two.sided	0	FALSE	TRUE	3.48426e-21	MA0761.1_ETV1	MA0761.1	ETV1	CBD vs. Ctrl
245	2351	1431	3782	1370266	1.00418e-21	two.sided	0	FALSE	TRUE	4.61443e-21	MA0472.2_EGR2	MA0472.2	EGR2	PSP vs. Ctrl
246	2351	643	2994	571325	2.10659e-21	two.sided	0	FALSE	TRUE	6.06823e-21	MA0465.1_CDX2	MA0465.1	CDX2	CBD vs. Ctrl
247	2351	643	2994	939963	2.573e-21	two.sided	0	FALSE	TRUE	7.35689e-21	MA0748.1_YY2	MA0748.1	YY2	CBD vs. Ctrl
248	643	1431	2074	581541	5.95581e-22	two.sided	0	FALSE	TRUE	7.92739e-21	MA0871.1_TFEC	MA0871.1	TFEC	PSP vs. CBD
249	2351	643	2994	572428	3.6283e-21	two.sided	0	FALSE	TRUE	1.0298e-20	MA0522.2_TCF3	MA0522.2	TCF3	CBD vs. Ctrl
250	2351	643	2994	572775	4.3023e-21	two.sided	0	FALSE	TRUE	1.21218e-20	MA0665.1_MSC	MA0665.1	MSC	CBD vs. Ctrl
251	2351	643	2994	936400	1.46741e-20	two.sided	0	FALSE	TRUE	4.1045e-20	MA0139.1_CTCF	MA0139.1	CTCF	CBD vs. Ctrl
252	2351	1431	3782	1984986	1.41474e-20	two.sided	0	FALSE	TRUE	6.34987e-20	MA0722.1_VAX1	MA0722.1	VAX1	PSP vs. Ctrl
253	2351	1431	3782	1984986	1.41474e-20	two.sided	0	FALSE	TRUE	6.34987e-20	MA0723.1_VAX2	MA0723.1	VAX2	PSP vs. Ctrl
254	2351	1431	3782	1983910	1.92924e-20	two.sided	0	FALSE	TRUE	8.55961e-20	MA0634.1_ALX3	MA0634.1	ALX3	PSP vs. Ctrl
255	2351	643	2994	934326	3.98129e-20	two.sided	0	FALSE	TRUE	1.1056e-19	MA0763.1_ETV3	MA0763.1	ETV3	CBD vs. Ctrl
256	2351	1431	3782	1981170	4.22963e-20	two.sided	0	FALSE	TRUE	1.83443e-19	MA0725.1_VSX1	MA0725.1	VSX1	PSP vs. Ctrl
257	2351	1431	3782	1981170	4.22963e-20	two.sided	0	FALSE	TRUE	1.83443e-19	MA0726.1_VSX2	MA0726.1	VSX2	PSP vs. Ctrl
258	2351	643	2994	578814	7.93508e-20	two.sided	0	FALSE	TRUE	2.18781e-19	MA0751.1_ZIC4	MA0751.1	ZIC4	CBD vs. Ctrl
259	2351	1431	3782	1980113	5.71484e-20	two.sided	0	FALSE	TRUE	2.45103e-19	MA0636.1_BHLHE41	MA0636.1	BHLHE41	PSP vs. Ctrl
260	2351	643	2994	579629	1.16736e-19	two.sided	0	FALSE	TRUE	3.19576e-19	MA0638.1_CREB3	MA0638.1	CREB3	CBD vs. Ctrl
261	2351	643	2994	579814	1.27396e-19	two.sided	0	FALSE	TRUE	3.46303e-19	MA0468.1_DUX4	MA0468.1	DUX4	CBD vs. Ctrl
262	2351	1431	3782	1385836	9.16934e-20	two.sided	0	FALSE	TRUE	3.88941e-19	MA0495.1_MAFF	MA0495.1	MAFF	PSP vs. Ctrl
263	2351	643	2994	580407	1.68478e-19	two.sided	0	FALSE	TRUE	4.54774e-19	MA0802.1_TBR1	MA0802.1	TBR1	CBD vs. Ctrl
264	643	1431	2074	576037	3.7869e-20	two.sided	0	FALSE	TRUE	4.87248e-19	MA0692.1_TFEB	MA0692.1	TFEB	PSP vs. CBD
265	2351	643	2994	580866	2.09039e-19	two.sided	0	FALSE	TRUE	5.6034e-19	MA0837.1_CEBPE	MA0837.1	CEBPE	CBD vs. Ctrl
266	2351	1431	3782	1976110	1.76965e-19	two.sided	0	FALSE	TRUE	7.42485e-19	MA0831.1_TFE3	MA0831.1	TFE3	PSP vs. Ctrl
267	643	1431	2074	575416	5.97881e-20	two.sided	0	FALSE	TRUE	7.44459e-19	MA0472.2_EGR2	MA0472.2	EGR2	PSP vs. CBD
268	2351	643	2994	929802	3.37726e-19	two.sided	0	FALSE	TRUE	8.99051e-19	MA0025.1_NFIL3	MA0025.1	NFIL3	CBD vs. Ctrl
269	2351	643	2994	929470	3.94267e-19	two.sided	0	FALSE	TRUE	1.04238e-18	MA0793.1_POU6F2	MA0793.1	POU6F2	CBD vs. Ctrl
270	2351	643	2994	928684	5.68124e-19	two.sided	0	FALSE	TRUE	1.49181e-18	MA0156.2_FEV	MA0156.2	FEV	CBD vs. Ctrl
271	2351	643	2994	583315	6.54665e-19	two.sided	0	FALSE	TRUE	1.70744e-18	MA0470.1_E2F4	MA0470.1	E2F4	CBD vs. Ctrl
272	2351	643	2994	583476	7.053e-19	two.sided	0	FALSE	TRUE	1.82715e-18	MA0653.1_IRF9	MA0653.1	IRF9	CBD vs. Ctrl
273	2351	643	2994	583936	8.72277e-19	two.sided	0	FALSE	TRUE	2.24466e-18	MA0685.1_SP4	MA0685.1	SP4	CBD vs. Ctrl
274	2351	1431	3782	1971494	6.39575e-19	two.sided	0	FALSE	TRUE	2.65458e-18	MA0686.1_SPDEF	MA0686.1	SPDEF	PSP vs. Ctrl
275	2351	1431	3782	1970657	8.05654e-19	two.sided	0	FALSE	TRUE	3.30832e-18	MA0692.1_TFEB	MA0692.1	TFEB	PSP vs. Ctrl
276	2351	643	2994	585098	1.4883e-18	two.sided	0	FALSE	TRUE	3.80453e-18	MA0800.1_EOMES	MA0800.1	EOMES	CBD vs. Ctrl
277	2351	1431	3782	1969797	1.02062e-18	two.sided	0	FALSE	TRUE	4.14695e-18	MA0706.1_MEOX2	MA0706.1	MEOX2	PSP vs. Ctrl
278	2351	643	2994	586465	2.77777e-18	two.sided	0	FALSE	TRUE	7.05407e-18	MA0836.1_CEBPD	MA0836.1	CEBPD	CBD vs. Ctrl
279	2351	643	2994	923917	5.03042e-18	two.sided	0	FALSE	TRUE	1.26911e-17	MA0914.1_ISL2	MA0914.1	ISL2	CBD vs. Ctrl
280	2351	1431	3782	1964669	4.12222e-18	two.sided	0	FALSE	TRUE	1.65748e-17	MA0887.1_EVX1	MA0887.1	EVX1	PSP vs. Ctrl
281	2351	1431	3782	1399923	4.48288e-18	two.sided	0	FALSE	TRUE	1.78391e-17	MA0131.2_HINFP	MA0131.2	HINFP	PSP vs. Ctrl
282	2351	643	2994	588876	8.2508e-18	two.sided	0	FALSE	TRUE	2.06806e-17	MA0834.1_ATF7	MA0834.1	ATF7	CBD vs. Ctrl
283	2351	1431	3782	1963655	5.41693e-18	two.sided	0	FALSE	TRUE	2.13361e-17	MA0640.1_ELF3	MA0640.1	ELF3	PSP vs. Ctrl
284	643	1431	2074	570246	2.43995e-18	two.sided	0	FALSE	TRUE	2.94319e-17	MA0835.1_BATF3	MA0835.1	BATF3	PSP vs. CBD
285	2351	1431	3782	1402847	9.82026e-18	two.sided	0	FALSE	TRUE	3.82891e-17	MA0782.1_PKNOX1	MA0782.1	PKNOX1	PSP vs. Ctrl
286	2351	1431	3782	1404032	1.34635e-17	two.sided	0	FALSE	TRUE	5.19692e-17	MA0139.1_CTCF	MA0139.1	CTCF	PSP vs. Ctrl
287	643	1431	2074	569195	5.08175e-18	two.sided	0	FALSE	TRUE	5.94411e-17	MA0834.1_ATF7	MA0834.1	ATF7	PSP vs. CBD
288	2351	1431	3782	1959632	1.58593e-17	two.sided	0	FALSE	TRUE	6.06109e-17	MA0442.1_SOX10	MA0442.1	SOX10	PSP vs. Ctrl
289	2351	643	2994	919863	3.06741e-17	two.sided	0	FALSE	TRUE	7.63884e-17	MA0613.1_FOXG1	MA0613.1	FOXG1	CBD vs. Ctrl
290	643	1431	2074	568582	7.7711e-18	two.sided	0	FALSE	TRUE	8.82248e-17	MA0017.2_NR2F1	MA0017.2	NR2F1	PSP vs. CBD
291	2351	643	2994	592871	4.84592e-17	two.sided	0	FALSE	TRUE	1.19905e-16	MA0688.1_TBX2	MA0688.1	TBX2	CBD vs. Ctrl
292	2351	1431	3782	1409690	5.96533e-17	two.sided	0	FALSE	TRUE	2.23555e-16	MA0801.1_MGA	MA0801.1	MGA	PSP vs. Ctrl
293	2351	1431	3782	1409690	5.96533e-17	two.sided	0	FALSE	TRUE	2.23555e-16	MA0803.1_TBX15	MA0803.1	TBX15	PSP vs. Ctrl
294	2351	1431	3782	1954416	6.24343e-17	two.sided	0	FALSE	TRUE	2.31727e-16	MA0871.1_TFEC	MA0871.1	TFEC	PSP vs. Ctrl
295	2351	1431	3782	1410699	7.75464e-17	two.sided	0	FALSE	TRUE	2.85075e-16	MA0517.1_STAT1::STAT2	MA0517.1	STAT1::STAT2	PSP vs. Ctrl
296	2351	1431	3782	1953277	8.39303e-17	two.sided	0	FALSE	TRUE	3.05633e-16	MA0662.1_MIXL1	MA0662.1	MIXL1	PSP vs. Ctrl
297	2351	1431	3782	1952807	9.47958e-17	two.sided	0	FALSE	TRUE	3.41974e-16	MA0598.2_EHF	MA0598.2	EHF	PSP vs. Ctrl
298	643	1431	2074	566305	3.68831e-17	two.sided	0	FALSE	TRUE	4.06768e-16	MA0656.1_JDP2(var.2)	MA0656.1	JDP2(var.2)	PSP vs. CBD
299	2351	643	2994	596500	2.334e-16	two.sided	0	FALSE	TRUE	5.73837e-16	MA0687.1_SPIC	MA0687.1	SPIC	CBD vs. Ctrl
300	2351	1431	3782	1413758	1.70783e-16	two.sided	0	FALSE	TRUE	6.10391e-16	MA0697.1_ZIC3	MA0697.1	ZIC3	PSP vs. Ctrl
301	2351	643	2994	914211	3.55037e-16	two.sided	0	FALSE	TRUE	8.67369e-16	MA0475.2_FLI1	MA0475.2	FLI1	CBD vs. Ctrl
302	2351	1431	3782	1415384	2.58919e-16	two.sided	0	FALSE	TRUE	9.16905e-16	MA0696.1_ZIC1	MA0696.1	ZIC1	PSP vs. Ctrl
303	2351	643	2994	598032	4.48567e-16	two.sided	0	FALSE	TRUE	1.08897e-15	MA0048.2_NHLH1	MA0048.2	NHLH1	CBD vs. Ctrl
304	643	1431	2074	563546	2.33146e-16	two.sided	0	FALSE	TRUE	2.43228e-15	MA0638.1_CREB3	MA0638.1	CREB3	PSP vs. CBD
305	643	1431	2074	563557	2.3146e-16	two.sided	0	FALSE	TRUE	2.43228e-15	MA0828.1_SREBF2(var.2)	MA0828.1	SREBF2(var.2)	PSP vs. CBD
306	2351	643	2994	600346	1.18941e-15	two.sided	0	FALSE	TRUE	2.86944e-15	MA0093.2_USF1	MA0093.2	USF1	CBD vs. Ctrl
307	2351	643	2994	911278	1.22423e-15	two.sided	0	FALSE	TRUE	2.93512e-15	MA0762.1_ETV2	MA0762.1	ETV2	CBD vs. Ctrl
308	2351	643	2994	600689	1.37274e-15	two.sided	0	FALSE	TRUE	3.27085e-15	MA0149.1_EWSR1-FLI1	MA0149.1	EWSR1-FLI1	CBD vs. Ctrl
309	2351	1431	3782	1942158	1.41507e-15	two.sided	0	FALSE	TRUE	4.96561e-15	MA0663.1_MLX	MA0663.1	MLX	PSP vs. Ctrl
310	2351	1431	3782	1422411	1.52017e-15	two.sided	0	FALSE	TRUE	5.28636e-15	MA0496.1_MAFK	MA0496.1	MAFK	PSP vs. Ctrl
311	2351	1431	3782	1422671	1.62163e-15	two.sided	0	FALSE	TRUE	5.58885e-15	MA0103.2_ZEB1	MA0103.2	ZEB1	PSP vs. Ctrl
312	2351	643	2994	909338	2.74211e-15	two.sided	0	FALSE	TRUE	6.49359e-15	MA0098.3_ETS1	MA0098.3	ETS1	CBD vs. Ctrl
313	2351	643	2994	602391	2.78319e-15	two.sided	0	FALSE	TRUE	6.55069e-15	MA0775.1_MEIS3	MA0775.1	MEIS3	CBD vs. Ctrl
314	643	1431	2074	561895	6.87115e-16	two.sided	0	FALSE	TRUE	6.97964e-15	MA0107.1_RELA	MA0107.1	RELA	PSP vs. CBD
315	2351	643	2994	602636	3.07935e-15	two.sided	0	FALSE	TRUE	7.20381e-15	MA0105.4_NFKB1	MA0105.4	NFKB1	CBD vs. Ctrl
316	2351	1431	3782	1424925	2.83188e-15	two.sided	0	FALSE	TRUE	9.67349e-15	MA0481.1_FOXP1	MA0481.1	FOXP1	PSP vs. Ctrl
317	2351	643	2994	907887	4.9801e-15	two.sided	0	FALSE	TRUE	1.15802e-14	MA0076.2_ELK4	MA0076.2	ELK4	CBD vs. Ctrl
318	2351	643	2994	604077	5.56384e-15	two.sided	0	FALSE	TRUE	1.28601e-14	MA0486.2_HSF1	MA0486.2	HSF1	CBD vs. Ctrl
319	2351	643	2994	907422	6.02258e-15	two.sided	0	FALSE	TRUE	1.38376e-14	MA0760.1_ERF	MA0760.1	ERF	CBD vs. Ctrl
320	2351	643	2994	604550	6.74827e-15	two.sided	0	FALSE	TRUE	1.54132e-14	MA0051.1_IRF2	MA0051.1	IRF2	CBD vs. Ctrl
321	2351	643	2994	605644	1.05216e-14	two.sided	0	FALSE	TRUE	2.38903e-14	MA0137.3_STAT1	MA0137.3	STAT1	CBD vs. Ctrl
322	2351	1431	3782	1430335	1.05887e-14	two.sided	0	FALSE	TRUE	3.58531e-14	MA0751.1_ZIC4	MA0751.1	ZIC4	PSP vs. Ctrl
323	2351	1431	3782	1933657	1.1353e-14	two.sided	0	FALSE	TRUE	3.81065e-14	MA0875.1_BARX1	MA0875.1	BARX1	PSP vs. Ctrl
324	643	1431	2074	360949	3.90744e-15	two.sided	0	FALSE	TRUE	3.86737e-14	MA0639.1_DBP	MA0639.1	DBP	PSP vs. CBD
325	2351	1431	3782	1933558	1.1627e-14	two.sided	0	FALSE	TRUE	3.869e-14	MA0088.2_ZNF143	MA0088.2	ZNF143	PSP vs. Ctrl
326	2351	643	2994	607189	1.95966e-14	two.sided	0	FALSE	TRUE	4.42356e-14	MA0729.1_RARA	MA0729.1	RARA	CBD vs. Ctrl
327	2351	643	2994	903881	2.51379e-14	two.sided	0	FALSE	TRUE	5.6414e-14	MA0680.1_PAX7	MA0680.1	PAX7	CBD vs. Ctrl
328	2351	643	2994	903511	2.91306e-14	two.sided	0	FALSE	TRUE	6.49966e-14	MA0875.1_BARX1	MA0875.1	BARX1	CBD vs. Ctrl
329	2351	1431	3782	1433026	2.02e-14	two.sided	0	FALSE	TRUE	6.66427e-14	MA0820.1_FIGLA	MA0820.1	FIGLA	PSP vs. Ctrl
330	2351	643	2994	608620	3.46686e-14	two.sided	0	FALSE	TRUE	7.69084e-14	MA0667.1_MYF6	MA0667.1	MYF6	CBD vs. Ctrl
331	2351	643	2994	608766	3.67353e-14	two.sided	0	FALSE	TRUE	8.10275e-14	MA0873.1_HOXD12	MA0873.1	HOXD12	CBD vs. Ctrl
332	2351	1431	3782	1930108	2.65476e-14	two.sided	0	FALSE	TRUE	8.68423e-14	MA0093.2_USF1	MA0093.2	USF1	PSP vs. Ctrl
333	643	1431	2074	557716	9.82651e-15	two.sided	0	FALSE	TRUE	9.48259e-14	MA0516.1_SP2	MA0516.1	SP2	PSP vs. CBD
334	643	1431	2074	557510	1.11722e-14	two.sided	0	FALSE	TRUE	1.05182e-13	MA0079.3_SP1	MA0079.3	SP1	PSP vs. CBD
335	643	1431	2074	557419	1.18229e-14	two.sided	0	FALSE	TRUE	1.08658e-13	MA0161.1_NFIC	MA0161.1	NFIC	PSP vs. CBD
336	643	1431	2074	557280	1.28895e-14	two.sided	0	FALSE	TRUE	1.15706e-13	MA0466.2_CEBPB	MA0466.2	CEBPB	PSP vs. CBD
337	2351	643	2994	610140	6.31771e-14	two.sided	0	FALSE	TRUE	1.38559e-13	MA0652.1_IRF8	MA0652.1	IRF8	CBD vs. Ctrl
338	2351	1431	3782	1927923	4.45277e-14	two.sided	0	FALSE	TRUE	1.44434e-13	MA0136.2_ELF5	MA0136.2	ELF5	PSP vs. Ctrl
339	643	1431	2074	556862	1.67004e-14	two.sided	0	FALSE	TRUE	1.46508e-13	MA0137.3_STAT1	MA0137.3	STAT1	PSP vs. CBD
340	643	1431	2074	556767	1.77104e-14	two.sided	0	FALSE	TRUE	1.51915e-13	MA0101.1_REL	MA0101.1	REL	PSP vs. CBD
341	2351	1431	3782	1437279	5.53003e-14	two.sided	0	FALSE	TRUE	1.77882e-13	MA0048.2_NHLH1	MA0048.2	NHLH1	PSP vs. Ctrl
342	2351	643	2994	900883	8.21502e-14	two.sided	0	FALSE	TRUE	1.79152e-13	MA0474.2_ERG	MA0474.2	ERG	CBD vs. Ctrl
343	643	1431	2074	363729	2.21536e-14	two.sided	0	FALSE	TRUE	1.85897e-13	MA0843.1_TEF	MA0843.1	TEF	PSP vs. CBD
344	2351	1431	3782	1438149	6.78109e-14	two.sided	0	FALSE	TRUE	2.16322e-13	MA0653.1_IRF9	MA0653.1	IRF9	PSP vs. Ctrl
345	643	1431	2074	555692	3.42845e-14	two.sided	0	FALSE	TRUE	2.81571e-13	MA0842.1_NRL	MA0842.1	NRL	PSP vs. CBD
346	2351	643	2994	612414	1.53314e-13	two.sided	0	FALSE	TRUE	3.32467e-13	MA0259.1_ARNT::HIF1A	MA0259.1	ARNT::HIF1A	CBD vs. Ctrl
347	643	1431	2074	555210	4.59955e-14	two.sided	0	FALSE	TRUE	3.6988e-13	MA0831.1_TFE3	MA0831.1	TFE3	PSP vs. CBD
348	2351	643	2994	613354	2.20306e-13	two.sided	0	FALSE	TRUE	4.75074e-13	MA0144.2_STAT3	MA0144.2	STAT3	CBD vs. Ctrl
349	2351	643	2994	613429	2.26749e-13	two.sided	0	FALSE	TRUE	4.86251e-13	MA0781.1_PAX9	MA0781.1	PAX9	CBD vs. Ctrl
350	643	1431	2074	554589	6.70215e-14	two.sided	0	FALSE	TRUE	5.27965e-13	MA0014.2_PAX5	MA0014.2	PAX5	PSP vs. CBD
351	2351	643	2994	614058	2.88595e-13	two.sided	0	FALSE	TRUE	6.15456e-13	MA0778.1_NFKB2	MA0778.1	NFKB2	CBD vs. Ctrl
352	2351	643	2994	614104	2.93718e-13	two.sided	0	FALSE	TRUE	6.22941e-13	MA0868.1_SOX8	MA0868.1	SOX8	CBD vs. Ctrl
353	2351	1431	3782	1920334	2.59293e-13	two.sided	0	FALSE	TRUE	8.20388e-13	MA0526.1_USF2	MA0526.1	USF2	PSP vs. Ctrl
354	643	1431	2074	553804	1.075e-13	two.sided	0	FALSE	TRUE	8.29903e-13	MA0837.1_CEBPE	MA0837.1	CEBPE	PSP vs. CBD
355	2351	643	2994	896794	3.97772e-13	two.sided	0	FALSE	TRUE	8.39017e-13	MA0507.1_POU2F2	MA0507.1	POU2F2	CBD vs. Ctrl
356	643	1431	2074	553703	1.14207e-13	two.sided	0	FALSE	TRUE	8.64386e-13	MA0052.3_MEF2A	MA0052.3	MEF2A	PSP vs. CBD
357	2351	1431	3782	1918073	4.33784e-13	two.sided	0	FALSE	TRUE	1.3613e-12	MA0707.1_MNX1	MA0707.1	MNX1	PSP vs. Ctrl
358	2351	643	2994	616331	6.84011e-13	two.sided	0	FALSE	TRUE	1.43494e-12	MA0779.1_PAX1	MA0779.1	PAX1	CBD vs. Ctrl
359	2351	1431	3782	1447299	5.55103e-13	two.sided	0	FALSE	TRUE	1.72798e-12	MA0783.1_PKNOX2	MA0783.1	PKNOX2	PSP vs. Ctrl
360	2351	1431	3782	1916541	6.13098e-13	two.sided	0	FALSE	TRUE	1.89325e-12	MA0671.1_NFIX	MA0671.1	NFIX	PSP vs. Ctrl
361	643	1431	2074	552165	2.84777e-13	two.sided	0	FALSE	TRUE	2.11392e-12	MA0844.1_XBP1	MA0844.1	XBP1	PSP vs. CBD
362	2351	1431	3782	1915769	7.2927e-13	two.sided	0	FALSE	TRUE	2.23411e-12	MA0664.1_MLXIPL	MA0664.1	MLXIPL	PSP vs. Ctrl
363	643	1431	2074	551754	3.62636e-13	two.sided	0	FALSE	TRUE	2.64108e-12	MA0836.1_CEBPD	MA0836.1	CEBPD	PSP vs. CBD
364	2351	643	2994	618336	1.4481e-12	two.sided	0	FALSE	TRUE	3.02144e-12	MA0771.1_HSF4	MA0771.1	HSF4	CBD vs. Ctrl
365	2351	643	2994	892624	1.89998e-12	two.sided	0	FALSE	TRUE	3.83974e-12	MA0042.2_FOXI1	MA0042.2	FOXI1	CBD vs. Ctrl
366	2351	643	2994	892624	1.89998e-12	two.sided	0	FALSE	TRUE	3.83974e-12	MA0033.2_FOXL1	MA0033.2	FOXL1	CBD vs. Ctrl
367	2351	643	2994	892624	1.89998e-12	two.sided	0	FALSE	TRUE	3.83974e-12	MA0847.1_FOXD2	MA0847.1	FOXD2	CBD vs. Ctrl
368	2351	643	2994	892624	1.89998e-12	two.sided	0	FALSE	TRUE	3.83974e-12	MA0848.1_FOXO4	MA0848.1	FOXO4	CBD vs. Ctrl
369	2351	643	2994	892624	1.89998e-12	two.sided	0	FALSE	TRUE	3.83974e-12	MA0849.1_FOXO6	MA0849.1	FOXO6	CBD vs. Ctrl
370	2351	643	2994	892624	1.89998e-12	two.sided	0	FALSE	TRUE	3.83974e-12	MA0850.1_FOXP3	MA0850.1	FOXP3	CBD vs. Ctrl
371	643	1431	2074	551057	5.45058e-13	two.sided	0	FALSE	TRUE	3.89615e-12	MA0112.3_ESR1	MA0112.3	ESR1	PSP vs. CBD
372	643	1431	2074	369136	5.64438e-13	two.sided	0	FALSE	TRUE	3.96133e-12	MA0634.1_ALX3	MA0634.1	ALX3	PSP vs. CBD
373	643	1431	2074	550851	6.14466e-13	two.sided	0	FALSE	TRUE	4.23542e-12	MA0783.1_PKNOX2	MA0783.1	PKNOX2	PSP vs. CBD
374	643	1431	2074	550401	7.97653e-13	two.sided	0	FALSE	TRUE	5.40165e-12	MA0746.1_SP3	MA0746.1	SP3	PSP vs. CBD
375	2351	643	2994	620116	2.79365e-12	two.sided	0	FALSE	TRUE	5.6164e-12	MA0820.1_FIGLA	MA0820.1	FIGLA	CBD vs. Ctrl
376	2351	643	2994	620167	2.8464e-12	two.sided	0	FALSE	TRUE	5.69279e-12	MA0069.1_Pax6	MA0069.1	Pax6	CBD vs. Ctrl
377	2351	643	2994	620385	3.08309e-12	two.sided	0	FALSE	TRUE	6.13441e-12	MA0528.1_ZNF263	MA0528.1	ZNF263	CBD vs. Ctrl
378	643	1431	2074	549841	1.10172e-12	two.sided	0	FALSE	TRUE	7.33214e-12	MA0733.1_EGR4	MA0733.1	EGR4	PSP vs. CBD
379	643	1431	2074	549797	1.12994e-12	two.sided	0	FALSE	TRUE	7.3925e-12	MA0050.2_IRF1	MA0050.2	IRF1	PSP vs. CBD
380	2351	643	2994	621813	5.18686e-12	two.sided	0	FALSE	TRUE	1.02673e-11	MA0599.1_KLF5	MA0599.1	KLF5	CBD vs. Ctrl
381	2351	1431	3782	1455476	3.40287e-12	two.sided	0	FALSE	TRUE	1.03426e-11	MA0809.1_TEAD4	MA0809.1	TEAD4	PSP vs. Ctrl
382	643	1431	2074	549125	1.66026e-12	two.sided	0	FALSE	TRUE	1.0681e-11	MA0797.1_TGIF2	MA0797.1	TGIF2	PSP vs. CBD
383	643	1431	2074	549095	1.68892e-12	two.sided	0	FALSE	TRUE	1.06872e-11	MA0144.2_STAT3	MA0144.2	STAT3	PSP vs. CBD
384	2351	1431	3782	1456580	4.32618e-12	two.sided	0	FALSE	TRUE	1.30461e-11	MA0772.1_IRF7	MA0772.1	IRF7	PSP vs. Ctrl
385	2351	1431	3782	1456718	4.45761e-12	two.sided	0	FALSE	TRUE	1.33383e-11	MA0689.1_TBX20	MA0689.1	TBX20	PSP vs. Ctrl
386	643	1431	2074	548311	2.63626e-12	two.sided	0	FALSE	TRUE	1.63453e-11	MA0773.1_MEF2D	MA0773.1	MEF2D	PSP vs. CBD
387	643	1431	2074	548290	2.66775e-12	two.sided	0	FALSE	TRUE	1.63453e-11	MA0782.1_PKNOX1	MA0782.1	PKNOX1	PSP vs. CBD
388	643	1431	2074	372700	4.32115e-12	two.sided	0	FALSE	TRUE	2.52722e-11	MA0702.1_LMX1A	MA0702.1	LMX1A	PSP vs. CBD
389	643	1431	2074	372700	4.32115e-12	two.sided	0	FALSE	TRUE	2.52722e-11	MA0716.1_PRRX1	MA0716.1	PRRX1	PSP vs. CBD
390	643	1431	2074	372700	4.32115e-12	two.sided	0	FALSE	TRUE	2.52722e-11	MA0721.1_UNCX	MA0721.1	UNCX	PSP vs. CBD
391	2351	1431	3782	1904091	9.41033e-12	two.sided	0	FALSE	TRUE	2.79414e-11	MA0464.2_BHLHE40	MA0464.2	BHLHE40	PSP vs. Ctrl
392	643	1431	2074	546882	5.87796e-12	two.sided	0	FALSE	TRUE	3.38641e-11	MA0119.1_NFIC::TLX1	MA0119.1	NFIC::TLX1	PSP vs. CBD
393	643	1431	2074	546687	6.55123e-12	two.sided	0	FALSE	TRUE	3.71879e-11	MA0660.1_MEF2B	MA0660.1	MEF2B	PSP vs. CBD
394	2351	643	2994	885838	2.19729e-11	two.sided	0	FALSE	TRUE	4.32732e-11	MA0072.1_RORA(var.2)	MA0072.1	RORA(var.2)	CBD vs. Ctrl
395	2351	643	2994	626617	2.87092e-11	two.sided	0	FALSE	TRUE	5.62526e-11	MA0774.1_MEIS2	MA0774.1	MEIS2	CBD vs. Ctrl
396	643	1431	2074	545835	1.04931e-11	two.sided	0	FALSE	TRUE	5.87004e-11	MA0486.2_HSF1	MA0486.2	HSF1	PSP vs. CBD
397	2351	643	2994	626834	3.09723e-11	two.sided	0	FALSE	TRUE	6.03804e-11	MA0258.2_ESR2	MA0258.2	ESR2	CBD vs. Ctrl
398	643	1431	2074	374852	1.42195e-11	two.sided	0	FALSE	TRUE	7.84104e-11	MA0630.1_SHOX	MA0630.1	SHOX	PSP vs. CBD
399	2351	643	2994	627616	4.06709e-11	two.sided	0	FALSE	TRUE	7.88892e-11	MA0597.1_THAP1	MA0597.1	THAP1	CBD vs. Ctrl
400	2351	1431	3782	1898522	3.04781e-11	two.sided	0	FALSE	TRUE	8.98058e-11	MA0058.3_MAX	MA0058.3	MAX	PSP vs. Ctrl
401	643	1431	2074	544797	1.85148e-11	two.sided	0	FALSE	TRUE	1.00658e-10	MA0839.1_CREB3L1	MA0839.1	CREB3L1	PSP vs. CBD
402	2351	643	2994	628513	5.54807e-11	two.sided	0	FALSE	TRUE	1.07078e-10	MA0740.1_KLF14	MA0740.1	KLF14	CBD vs. Ctrl
403	2351	1431	3782	1466919	3.87912e-11	two.sided	0	FALSE	TRUE	1.12909e-10	MA0805.1_TBX1	MA0805.1	TBX1	PSP vs. Ctrl
404	2351	1431	3782	1897348	3.89039e-11	two.sided	0	FALSE	TRUE	1.12909e-10	MA0882.1_DLX6	MA0882.1	DLX6	PSP vs. Ctrl
405	2351	1431	3782	1467084	4.0141e-11	two.sided	0	FALSE	TRUE	1.1563e-10	MA0733.1_EGR4	MA0733.1	EGR4	PSP vs. Ctrl
406	2351	1431	3782	1467715	4.57401e-11	two.sided	0	FALSE	TRUE	1.30783e-10	MA0842.1_NRL	MA0842.1	NRL	PSP vs. Ctrl
407	2351	643	2994	629189	7.00124e-11	two.sided	0	FALSE	TRUE	1.34452e-10	MA0017.2_NR2F1	MA0017.2	NR2F1	CBD vs. Ctrl
408	643	1431	2074	544154	2.62325e-11	two.sided	0	FALSE	TRUE	1.38709e-10	MA0497.1_MEF2C	MA0497.1	MEF2C	PSP vs. CBD
409	643	1431	2074	375956	2.59087e-11	two.sided	0	FALSE	TRUE	1.38709e-10	MA0893.1_GSX2	MA0893.1	GSX2	PSP vs. CBD
410	2351	1431	3782	1468368	5.23377e-11	two.sided	0	FALSE	TRUE	1.48547e-10	MA0107.1_RELA	MA0107.1	RELA	PSP vs. Ctrl
411	2351	643	2994	629595	8.04649e-11	two.sided	0	FALSE	TRUE	1.5376e-10	MA0610.1_DMRT3	MA0610.1	DMRT3	CBD vs. Ctrl
412	2351	1431	3782	1470087	7.44806e-11	two.sided	0	FALSE	TRUE	2.0985e-10	MA0797.1_TGIF2	MA0797.1	TGIF2	PSP vs. Ctrl
413	2351	1431	3782	1894016	7.724e-11	two.sided	0	FALSE	TRUE	2.16048e-10	MA0703.1_LMX1B	MA0703.1	LMX1B	PSP vs. Ctrl
414	643	1431	2074	543014	4.83511e-11	two.sided	0	FALSE	TRUE	2.5221e-10	MA0596.1_SREBF2	MA0596.1	SREBF2	PSP vs. CBD
415	643	1431	2074	377231	5.13227e-11	two.sided	0	FALSE	TRUE	2.64141e-10	MA0662.1_MIXL1	MA0662.1	MIXL1	PSP vs. CBD
416	643	1431	2074	542637	5.90834e-11	two.sided	0	FALSE	TRUE	2.98076e-10	MA0663.1_MLX	MA0663.1	MLX	PSP vs. CBD
417	643	1431	2074	377508	5.94607e-11	two.sided	0	FALSE	TRUE	2.98076e-10	MA0699.1_LBX2	MA0699.1	LBX2	PSP vs. CBD
418	2351	643	2994	632151	1.91335e-10	two.sided	0	FALSE	TRUE	3.6382e-10	MA0160.1_NR4A2	MA0160.1	NR4A2	CBD vs. Ctrl
419	2351	1431	3782	1473187	1.39758e-10	two.sided	0	FALSE	TRUE	3.88105e-10	MA0081.1_SPIB	MA0081.1	SPIB	PSP vs. Ctrl
420	2351	643	2994	632387	2.07089e-10	two.sided	0	FALSE	TRUE	3.91845e-10	MA0066.1_PPARG	MA0066.1	PPARG	CBD vs. Ctrl
421	643	1431	2074	541922	8.62051e-11	two.sided	0	FALSE	TRUE	4.26605e-10	MA0058.3_MAX	MA0058.3	MAX	PSP vs. CBD
422	2351	1431	3782	1474184	1.70791e-10	two.sided	0	FALSE	TRUE	4.70896e-10	MA0659.1_MAFG	MA0659.1	MAFG	PSP vs. Ctrl
423	2351	643	2994	633423	2.92593e-10	two.sided	0	FALSE	TRUE	5.50931e-10	MA0822.1_HES7	MA0822.1	HES7	CBD vs. Ctrl
424	643	1431	2074	540155	2.16341e-10	two.sided	0	FALSE	TRUE	1.05706e-09	MA0481.1_FOXP1	MA0481.1	FOXP1	PSP vs. CBD
425	2351	643	2994	635499	5.79987e-10	two.sided	0	FALSE	TRUE	1.08677e-09	MA0747.1_SP8	MA0747.1	SP8	CBD vs. Ctrl
426	2351	643	2994	635780	6.35723e-10	two.sided	0	FALSE	TRUE	1.18545e-09	MA0878.1_CDX1	MA0878.1	CDX1	CBD vs. Ctrl
427	643	1431	2074	539666	2.78133e-10	two.sided	0	FALSE	TRUE	1.34199e-09	MA0160.1_NR4A2	MA0160.1	NR4A2	PSP vs. CBD
428	2351	643	2994	636358	7.67284e-10	two.sided	0	FALSE	TRUE	1.4239e-09	MA0736.1_GLIS2	MA0736.1	GLIS2	CBD vs. Ctrl
429	2351	1431	3782	1482014	7.99069e-10	two.sided	0	FALSE	TRUE	2.18752e-09	MA0259.1_ARNT::HIF1A	MA0259.1	ARNT::HIF1A	PSP vs. Ctrl
430	643	1431	2074	381488	4.67753e-10	two.sided	0	FALSE	TRUE	2.22904e-09	MA0661.1_MEOX1	MA0661.1	MEOX1	PSP vs. CBD
431	643	1431	2074	538549	4.91022e-10	two.sided	0	FALSE	TRUE	2.3114e-09	MA0729.1_RARA	MA0729.1	RARA	PSP vs. CBD
432	2351	1431	3782	1881700	8.91573e-10	two.sided	0	FALSE	TRUE	2.42357e-09	MA0060.2_NFYA	MA0060.2	NFYA	PSP vs. Ctrl
433	2351	643	2994	638218	1.39726e-09	two.sided	0	FALSE	TRUE	2.58059e-09	MA0770.1_HSF2	MA0770.1	HSF2	CBD vs. Ctrl
434	643	1431	2074	538213	5.81705e-10	two.sided	0	FALSE	TRUE	2.68386e-09	MA0599.1_KLF5	MA0599.1	KLF5	PSP vs. CBD
435	643	1431	2074	538205	5.84052e-10	two.sided	0	FALSE	TRUE	2.68386e-09	MA0796.1_TGIF1	MA0796.1	TGIF1	PSP vs. CBD
436	2351	1431	3782	1880078	1.21769e-09	two.sided	0	FALSE	TRUE	3.28692e-09	MA0613.1_FOXG1	MA0613.1	FOXG1	PSP vs. Ctrl
437	643	1431	2074	537603	7.89871e-10	two.sided	0	FALSE	TRUE	3.58695e-09	MA0130.1_ZNF354C	MA0130.1	ZNF354C	PSP vs. CBD
438	2351	643	2994	639532	2.12246e-09	two.sided	0	FALSE	TRUE	3.90129e-09	MA0908.1_HOXD11	MA0908.1	HOXD11	CBD vs. Ctrl
439	2351	1431	3782	1485578	1.58299e-09	two.sided	0	FALSE	TRUE	4.24329e-09	MA0652.1_IRF8	MA0652.1	IRF8	PSP vs. Ctrl
440	2351	1431	3782	1877861	1.85728e-09	two.sided	0	FALSE	TRUE	4.94422e-09	MA0639.1_DBP	MA0639.1	DBP	PSP vs. Ctrl
441	2351	643	2994	640330	2.72996e-09	two.sided	0	FALSE	TRUE	4.99415e-09	MA0080.4_SPI1	MA0080.4	SPI1	CBD vs. Ctrl
442	2351	643	2994	640657	3.02514e-09	two.sided	0	FALSE	TRUE	5.50803e-09	MA0906.1_HOXC12	MA0906.1	HOXC12	CBD vs. Ctrl
443	2351	1431	3782	1877057	2.16213e-09	two.sided	0	FALSE	TRUE	5.67743e-09	MA0031.1_FOXD1	MA0031.1	FOXD1	PSP vs. Ctrl
444	2351	1431	3782	1877057	2.16213e-09	two.sided	0	FALSE	TRUE	5.67743e-09	MA0157.2_FOXO3	MA0157.2	FOXO3	PSP vs. Ctrl
445	2351	643	2994	640861	3.22479e-09	two.sided	0	FALSE	TRUE	5.84398e-09	MA0131.2_HINFP	MA0131.2	HINFP	CBD vs. Ctrl
446	2351	643	2994	641066	3.43832e-09	two.sided	0	FALSE	TRUE	6.20182e-09	MA0651.1_HOXC11	MA0651.1	HOXC11	CBD vs. Ctrl
447	643	1431	2074	536409	1.428e-09	two.sided	0	FALSE	TRUE	6.33573e-09	MA0645.1_ETV6	MA0645.1	ETV6	PSP vs. CBD
448	643	1431	2074	536419	1.42099e-09	two.sided	0	FALSE	TRUE	6.33573e-09	MA0691.1_TFAP4	MA0691.1	TFAP4	PSP vs. CBD
449	643	1431	2074	536077	1.68098e-09	two.sided	0	FALSE	TRUE	7.37338e-09	MA0771.1_HSF4	MA0771.1	HSF4	PSP vs. CBD
450	2351	1431	3782	1875286	3.0155e-09	two.sided	0	FALSE	TRUE	7.86474e-09	MA0484.1_HNF4G	MA0484.1	HNF4G	PSP vs. Ctrl
451	2351	1431	3782	1875229	3.04781e-09	two.sided	0	FALSE	TRUE	7.89567e-09	MA0843.1_TEF	MA0843.1	TEF	PSP vs. Ctrl
452	2351	1431	3782	1489843	3.5326e-09	two.sided	0	FALSE	TRUE	9.09056e-09	MA0090.2_TEAD1	MA0090.2	TEAD1	PSP vs. Ctrl
453	643	1431	2074	535008	2.82906e-09	two.sided	0	FALSE	TRUE	1.22698e-08	MA0468.1_DUX4	MA0468.1	DUX4	PSP vs. CBD
454	643	1431	2074	534742	3.2168e-09	two.sided	0	FALSE	TRUE	1.37965e-08	MA0763.1_ETV3	MA0763.1	ETV3	PSP vs. CBD
455	2351	1431	3782	1492562	5.84185e-09	two.sided	0	FALSE	TRUE	1.49335e-08	MA0690.1_TBX21	MA0690.1	TBX21	PSP vs. Ctrl
456	2351	643	2994	867641	8.64139e-09	two.sided	0	FALSE	TRUE	1.54425e-08	MA0031.1_FOXD1	MA0031.1	FOXD1	CBD vs. Ctrl
457	2351	643	2994	867641	8.64139e-09	two.sided	0	FALSE	TRUE	1.54425e-08	MA0157.2_FOXO3	MA0157.2	FOXO3	CBD vs. Ctrl
458	2351	643	2994	867307	9.566e-09	two.sided	0	FALSE	TRUE	1.7016e-08	MA0473.2_ELF1	MA0473.2	ELF1	CBD vs. Ctrl
459	2351	1431	3782	1869966	8.05061e-09	two.sided	0	FALSE	TRUE	2.04443e-08	MA0828.1_SREBF2(var.2)	MA0828.1	SREBF2(var.2)	PSP vs. Ctrl
460	643	1431	2074	387021	7.00064e-09	two.sided	0	FALSE	TRUE	2.9695e-08	MA0502.1_NFYB	MA0502.1	NFYB	PSP vs. CBD
461	2351	643	2994	646536	1.82774e-08	two.sided	0	FALSE	TRUE	3.23628e-08	MA0508.1_PRDM1	MA0508.1	PRDM1	CBD vs. Ctrl
462	2351	1431	3782	1866465	1.51468e-08	two.sided	0	FALSE	TRUE	3.82134e-08	MA0593.1_FOXP2	MA0593.1	FOXP2	PSP vs. Ctrl
463	2351	1431	3782	1498517	1.7167e-08	two.sided	0	FALSE	TRUE	4.30289e-08	MA0471.1_E2F6	MA0471.1	E2F6	PSP vs. Ctrl
464	2351	1431	3782	1498955	1.85596e-08	two.sided	0	FALSE	TRUE	4.62193e-08	MA0750.1_ZBTB7A	MA0750.1	ZBTB7A	PSP vs. Ctrl
465	643	1431	2074	532088	1.13157e-08	two.sided	0	FALSE	TRUE	4.69662e-08	MA0083.3_SRF	MA0083.3	SRF	PSP vs. CBD
466	643	1431	2074	388029	1.12317e-08	two.sided	0	FALSE	TRUE	4.69662e-08	MA0703.1_LMX1B	MA0703.1	LMX1B	PSP vs. CBD
467	2351	1431	3782	1864340	2.21077e-08	two.sided	0	FALSE	TRUE	5.47025e-08	MA0670.1_NFIA	MA0670.1	NFIA	PSP vs. Ctrl
468	643	1431	2074	531628	1.40106e-08	two.sided	0	FALSE	TRUE	5.75327e-08	MA0595.1_SREBF1	MA0595.1	SREBF1	PSP vs. CBD
469	2351	643	2994	862641	3.84053e-08	two.sided	0	FALSE	TRUE	6.76916e-08	MA0593.1_FOXP2	MA0593.1	FOXP2	CBD vs. Ctrl
470	643	1431	2074	531050	1.82907e-08	two.sided	0	FALSE	TRUE	7.43181e-08	MA0149.1_EWSR1-FLI1	MA0149.1	EWSR1-FLI1	PSP vs. CBD
471	643	1431	2074	389266	1.98931e-08	two.sided	0	FALSE	TRUE	7.99867e-08	MA0892.1_GSX1	MA0892.1	GSX1	PSP vs. CBD
472	2351	1431	3782	1861887	3.40314e-08	two.sided	0	FALSE	TRUE	8.36697e-08	MA0119.1_NFIC::TLX1	MA0119.1	NFIC::TLX1	PSP vs. Ctrl
473	643	1431	2074	530544	2.30598e-08	two.sided	0	FALSE	TRUE	9.17639e-08	MA0770.1_HSF2	MA0770.1	HSF2	PSP vs. CBD
474	2351	1431	3782	1861101	3.90302e-08	two.sided	0	FALSE	TRUE	9.24273e-08	MA0042.2_FOXI1	MA0042.2	FOXI1	PSP vs. Ctrl
475	2351	1431	3782	1861101	3.90302e-08	two.sided	0	FALSE	TRUE	9.24273e-08	MA0033.2_FOXL1	MA0033.2	FOXL1	PSP vs. Ctrl
476	2351	1431	3782	1861101	3.90302e-08	two.sided	0	FALSE	TRUE	9.24273e-08	MA0847.1_FOXD2	MA0847.1	FOXD2	PSP vs. Ctrl
477	2351	1431	3782	1861101	3.90302e-08	two.sided	0	FALSE	TRUE	9.24273e-08	MA0848.1_FOXO4	MA0848.1	FOXO4	PSP vs. Ctrl
478	2351	1431	3782	1861101	3.90302e-08	two.sided	0	FALSE	TRUE	9.24273e-08	MA0849.1_FOXO6	MA0849.1	FOXO6	PSP vs. Ctrl
479	2351	1431	3782	1861101	3.90302e-08	two.sided	0	FALSE	TRUE	9.24273e-08	MA0850.1_FOXP3	MA0850.1	FOXP3	PSP vs. Ctrl
480	2351	1431	3782	1503600	4.1986e-08	two.sided	0	FALSE	TRUE	9.88207e-08	MA0101.1_REL	MA0101.1	REL	PSP vs. Ctrl
481	643	1431	2074	530350	2.51916e-08	two.sided	0	FALSE	TRUE	9.9224e-08	MA0732.1_EGR3	MA0732.1	EGR3	PSP vs. CBD
482	643	1431	2074	530206	2.68964e-08	two.sided	0	FALSE	TRUE	1.04869e-07	MA0636.1_BHLHE41	MA0636.1	BHLHE41	PSP vs. CBD
483	2351	643	2994	650642	6.08876e-08	two.sided	0	FALSE	TRUE	1.0683e-07	MA0059.1_MAX::MYC	MA0059.1	MAX::MYC	CBD vs. Ctrl
484	2351	643	2994	860907	6.34622e-08	two.sided	0	FALSE	TRUE	1.10843e-07	MA0789.1_POU3F4	MA0789.1	POU3F4	CBD vs. Ctrl
485	643	1431	2074	390243	3.10389e-08	two.sided	0	FALSE	TRUE	1.1981e-07	MA0886.1_EMX2	MA0886.1	EMX2	PSP vs. CBD
486	643	1431	2074	529730	3.33661e-08	two.sided	0	FALSE	TRUE	1.27518e-07	MA0513.1_SMAD2::SMAD3::SMAD4	MA0513.1	SMAD2::SMAD3::SMAD4	PSP vs. CBD
487	643	1431	2074	390495	3.47799e-08	two.sided	0	FALSE	TRUE	1.31618e-07	MA0710.1_NOTO	MA0710.1	NOTO	PSP vs. CBD
488	643	1431	2074	391109	4.58186e-08	two.sided	0	FALSE	TRUE	1.68438e-07	MA0654.1_ISX	MA0654.1	ISX	PSP vs. CBD
489	643	1431	2074	391109	4.58186e-08	two.sided	0	FALSE	TRUE	1.68438e-07	MA0701.1_LHX9	MA0701.1	LHX9	PSP vs. CBD
490	643	1431	2074	391109	4.58186e-08	two.sided	0	FALSE	TRUE	1.68438e-07	MA0717.1_RAX2	MA0717.1	RAX2	PSP vs. CBD
491	2351	1431	3782	1856899	8.04319e-08	two.sided	0	FALSE	TRUE	1.88162e-07	MA0043.2_HLF	MA0043.2	HLF	PSP vs. Ctrl
492	2351	643	2994	653120	1.23256e-07	two.sided	0	FALSE	TRUE	2.14309e-07	MA0905.1_HOXC10	MA0905.1	HOXC10	CBD vs. Ctrl
493	643	1431	2074	392346	7.9284e-08	two.sided	0	FALSE	TRUE	2.83367e-07	MA0666.1_MSX1	MA0666.1	MSX1	PSP vs. CBD
494	643	1431	2074	392346	7.9284e-08	two.sided	0	FALSE	TRUE	2.83367e-07	MA0708.1_MSX2	MA0708.1	MSX2	PSP vs. CBD
495	643	1431	2074	392346	7.9284e-08	two.sided	0	FALSE	TRUE	2.83367e-07	MA0876.1_BSX	MA0876.1	BSX	PSP vs. CBD
496	643	1431	2074	392498	8.47556e-08	two.sided	0	FALSE	TRUE	3.00144e-07	MA0068.2_PAX4	MA0068.2	PAX4	PSP vs. CBD
497	2351	643	2994	857070	1.876e-07	two.sided	0	FALSE	TRUE	3.24725e-07	MA0095.2_YY1	MA0095.2	YY1	CBD vs. Ctrl
498	2351	1431	3782	1511124	1.51067e-07	two.sided	0	FALSE	TRUE	3.51276e-07	MA0595.1_SREBF1	MA0595.1	SREBF1	PSP vs. Ctrl
499	643	1431	2074	392897	1.00915e-07	two.sided	0	FALSE	TRUE	3.54121e-07	MA0025.1_NFIL3	MA0025.1	NFIL3	PSP vs. CBD
500	643	1431	2074	527060	1.08957e-07	two.sided	0	FALSE	TRUE	3.78894e-07	MA0690.1_TBX21	MA0690.1	TBX21	PSP vs. CBD
501	2351	643	2994	655330	2.28126e-07	two.sided	0	FALSE	TRUE	3.93109e-07	MA0498.2_MEIS1	MA0498.2	MEIS1	CBD vs. Ctrl
502	2351	643	2994	855908	2.5855e-07	two.sided	0	FALSE	TRUE	4.43556e-07	MA0780.1_PAX3	MA0780.1	PAX3	CBD vs. Ctrl
503	643	1431	2074	393567	1.34981e-07	two.sided	0	FALSE	TRUE	4.65202e-07	MA0027.2_EN1	MA0027.2	EN1	PSP vs. CBD
504	643	1431	2074	526462	1.4118e-07	two.sided	0	FALSE	TRUE	4.82261e-07	MA0805.1_TBX1	MA0805.1	TBX1	PSP vs. CBD
505	643	1431	2074	526362	1.474e-07	two.sided	0	FALSE	TRUE	4.9909e-07	MA0781.1_PAX9	MA0781.1	PAX9	PSP vs. CBD
506	2351	1431	3782	1513752	2.33395e-07	two.sided	0	FALSE	TRUE	5.39465e-07	MA0736.1_GLIS2	MA0736.1	GLIS2	PSP vs. Ctrl
507	643	1431	2074	526141	1.621e-07	two.sided	0	FALSE	TRUE	5.44091e-07	MA0056.1_MZF1	MA0056.1	MZF1	PSP vs. CBD
508	643	1431	2074	525998	1.72356e-07	two.sided	0	FALSE	TRUE	5.7353e-07	MA0103.2_ZEB1	MA0103.2	ZEB1	PSP vs. CBD
509	2351	643	2994	657091	3.6925e-07	two.sided	0	FALSE	TRUE	6.30666e-07	MA0795.1_SMAD3	MA0795.1	SMAD3	CBD vs. Ctrl
510	643	1431	2074	525751	1.91568e-07	two.sided	0	FALSE	TRUE	6.3201e-07	MA0258.2_ESR2	MA0258.2	ESR2	PSP vs. CBD
511	2351	1431	3782	1515249	2.98184e-07	two.sided	0	FALSE	TRUE	6.85113e-07	MA0162.2_EGR1	MA0162.2	EGR1	PSP vs. Ctrl
512	643	1431	2074	525329	2.29278e-07	two.sided	0	FALSE	TRUE	7.5001e-07	MA0059.1_MAX::MYC	MA0059.1	MAX::MYC	PSP vs. CBD
513	2351	1431	3782	1515919	3.32516e-07	two.sided	0	FALSE	TRUE	7.59475e-07	MA0740.1_KLF14	MA0740.1	KLF14	PSP vs. Ctrl
514	2351	1431	3782	1516093	3.42039e-07	two.sided	0	FALSE	TRUE	7.76629e-07	MA0105.4_NFKB1	MA0105.4	NFKB1	PSP vs. Ctrl
515	2351	643	2994	658186	4.96165e-07	two.sided	0	FALSE	TRUE	8.43699e-07	MA0159.1_RARA::RXRA	MA0159.1	RARA::RXRA	CBD vs. Ctrl
516	643	1431	2074	524953	2.68842e-07	two.sided	0	FALSE	TRUE	8.72044e-07	MA0687.1_SPIC	MA0687.1	SPIC	PSP vs. CBD
517	643	1431	2074	524780	2.89189e-07	two.sided	0	FALSE	TRUE	9.30225e-07	MA0689.1_TBX20	MA0689.1	TBX20	PSP vs. CBD
518	2351	1431	3782	1846921	4.19761e-07	two.sided	0	FALSE	TRUE	9.47532e-07	MA0914.1_ISL2	MA0914.1	ISL2	PSP vs. Ctrl
519	643	1431	2074	524485	3.27362e-07	two.sided	0	FALSE	TRUE	1.04431e-06	MA0823.1_HEY1	MA0823.1	HEY1	PSP vs. CBD
520	2351	1431	3782	1518041	4.68314e-07	two.sided	0	FALSE	TRUE	1.05098e-06	MA0051.1_IRF2	MA0051.1	IRF2	PSP vs. Ctrl
521	2351	643	2994	659074	6.29065e-07	two.sided	0	FALSE	TRUE	1.065e-06	MA0744.1_SCRT2	MA0744.1	SCRT2	CBD vs. Ctrl
522	643	1431	2074	395761	3.43236e-07	two.sided	0	FALSE	TRUE	1.08598e-06	MA0727.1_NR3C2	MA0727.1	NR3C2	PSP vs. CBD
523	643	1431	2074	524271	3.58051e-07	two.sided	0	FALSE	TRUE	1.12364e-06	MA0159.1_RARA::RXRA	MA0159.1	RARA::RXRA	PSP vs. CBD
524	2351	1431	3782	1519018	5.47535e-07	two.sided	0	FALSE	TRUE	1.22167e-06	MA0506.1_NRF1	MA0506.1	NRF1	PSP vs. Ctrl
525	643	1431	2074	396103	3.95938e-07	two.sided	0	FALSE	TRUE	1.23252e-06	MA0644.1_ESX1	MA0644.1	ESX1	PSP vs. CBD
526	2351	1431	3782	1845171	5.55628e-07	two.sided	0	FALSE	TRUE	1.2326e-06	MA0780.1_PAX3	MA0780.1	PAX3	PSP vs. Ctrl
527	2351	643	2994	851860	7.69302e-07	two.sided	0	FALSE	TRUE	1.29673e-06	MA0895.1_HMBOX1	MA0895.1	HMBOX1	CBD vs. Ctrl
528	2351	643	2994	659986	8.0101e-07	two.sided	0	FALSE	TRUE	1.3443e-06	MA0871.1_TFEC	MA0871.1	TFEC	CBD vs. Ctrl
529	2351	643	2994	660033	8.11e-07	two.sided	0	FALSE	TRUE	1.35518e-06	MA0828.1_SREBF2(var.2)	MA0828.1	SREBF2(var.2)	CBD vs. Ctrl
530	643	1431	2074	396375	4.43347e-07	two.sided	0	FALSE	TRUE	1.36905e-06	MA0060.2_NFYA	MA0060.2	NFYA	PSP vs. CBD
531	2351	1431	3782	1520271	6.68202e-07	two.sided	0	FALSE	TRUE	1.47386e-06	MA0794.1_PROX1	MA0794.1	PROX1	PSP vs. Ctrl
532	2351	643	2994	660709	9.68666e-07	two.sided	0	FALSE	TRUE	1.61166e-06	MA0056.1_MZF1	MA0056.1	MZF1	CBD vs. Ctrl
533	643	1431	2074	396948	5.6179e-07	two.sided	0	FALSE	TRUE	1.70749e-06	MA0674.1_NKX6-1	MA0674.1	NKX6-1	PSP vs. CBD
534	643	1431	2074	396948	5.6179e-07	two.sided	0	FALSE	TRUE	1.70749e-06	MA0675.1_NKX6-2	MA0675.1	NKX6-2	PSP vs. CBD
535	643	1431	2074	523075	5.8778e-07	two.sided	0	FALSE	TRUE	1.77253e-06	MA0028.2_ELK1	MA0028.2	ELK1	PSP vs. CBD
536	643	1431	2074	523039	5.96535e-07	two.sided	0	FALSE	TRUE	1.78498e-06	MA0098.3_ETS1	MA0098.3	ETS1	PSP vs. CBD
537	643	1431	2074	522700	6.85384e-07	two.sided	0	FALSE	TRUE	2.03506e-06	MA0066.1_PPARG	MA0066.1	PPARG	PSP vs. CBD
538	2351	1431	3782	1522610	9.65402e-07	two.sided	0	FALSE	TRUE	2.1173e-06	MA0908.1_HOXD11	MA0908.1	HOXD11	PSP vs. Ctrl
539	643	1431	2074	522542	7.31028e-07	two.sided	0	FALSE	TRUE	2.15402e-06	MA0597.1_THAP1	MA0597.1	THAP1	PSP vs. CBD
540	2351	1431	3782	1841198	1.03935e-06	two.sided	0	FALSE	TRUE	2.2666e-06	MA0680.1_PAX7	MA0680.1	PAX7	PSP vs. Ctrl
541	2351	1431	3782	1523194	1.05747e-06	two.sided	0	FALSE	TRUE	2.29317e-06	MA0014.2_PAX5	MA0014.2	PAX5	PSP vs. Ctrl
542	643	1431	2074	522304	8.05354e-07	two.sided	0	FALSE	TRUE	2.35505e-06	MA0664.1_MLXIPL	MA0664.1	MLXIPL	PSP vs. CBD
543	643	1431	2074	398011	8.67049e-07	two.sided	0	FALSE	TRUE	2.5164e-06	MA0889.1_GBX1	MA0889.1	GBX1	PSP vs. CBD
544	2351	643	2994	662690	1.61936e-06	two.sided	0	FALSE	TRUE	2.68272e-06	MA0741.1_KLF16	MA0741.1	KLF16	CBD vs. Ctrl
545	643	1431	2074	521445	1.139e-06	two.sided	0	FALSE	TRUE	3.28099e-06	MA0069.1_Pax6	MA0069.1	Pax6	PSP vs. CBD
546	643	1431	2074	521355	1.18081e-06	two.sided	0	FALSE	TRUE	3.37625e-06	MA0759.1_ELK3	MA0759.1	ELK3	PSP vs. CBD
547	2351	643	2994	663821	2.16173e-06	two.sided	0	FALSE	TRUE	3.56593e-06	MA0812.1_TFAP2B(var.2)	MA0812.1	TFAP2B(var.2)	CBD vs. Ctrl
548	643	1431	2074	521182	1.26538e-06	two.sided	0	FALSE	TRUE	3.59146e-06	MA0473.2_ELF1	MA0473.2	ELF1	PSP vs. CBD
549	2351	643	2994	663878	2.19324e-06	two.sided	0	FALSE	TRUE	3.60252e-06	MA0750.1_ZBTB7A	MA0750.1	ZBTB7A	CBD vs. Ctrl
550	2351	1431	3782	1527285	1.98435e-06	two.sided	0	FALSE	TRUE	4.27911e-06	MA0130.1_ZNF354C	MA0130.1	ZNF354C	PSP vs. Ctrl
551	643	1431	2074	520716	1.52317e-06	two.sided	0	FALSE	TRUE	4.28418e-06	MA0095.2_YY1	MA0095.2	YY1	PSP vs. CBD
552	643	1431	2074	520702	1.53165e-06	two.sided	0	FALSE	TRUE	4.28418e-06	MA0649.1_HEY2	MA0649.1	HEY2	PSP vs. CBD
553	643	1431	2074	520623	1.58034e-06	two.sided	0	FALSE	TRUE	4.38858e-06	MA0665.1_MSC	MA0665.1	MSC	PSP vs. CBD
554	2351	1431	3782	1527504	2.05147e-06	two.sided	0	FALSE	TRUE	4.39927e-06	MA0815.1_TFAP2C(var.3)	MA0815.1	TFAP2C(var.3)	PSP vs. Ctrl
555	643	1431	2074	520509	1.65324e-06	two.sided	0	FALSE	TRUE	4.5259e-06	MA0670.1_NFIA	MA0670.1	NFIA	PSP vs. CBD
556	643	1431	2074	399617	1.64867e-06	two.sided	0	FALSE	TRUE	4.5259e-06	MA0700.1_LHX2	MA0700.1	LHX2	PSP vs. CBD
557	2351	1431	3782	1528404	2.35091e-06	two.sided	0	FALSE	TRUE	5.01354e-06	MA0003.3_TFAP2A	MA0003.3	TFAP2A	PSP vs. Ctrl
558	643	1431	2074	399940	1.8726e-06	two.sided	0	FALSE	TRUE	5.03345e-06	MA0707.1_MNX1	MA0707.1	MNX1	PSP vs. CBD
559	643	1431	2074	520186	1.87776e-06	two.sided	0	FALSE	TRUE	5.03345e-06	MA0801.1_MGA	MA0801.1	MGA	PSP vs. CBD
560	643	1431	2074	520186	1.87776e-06	two.sided	0	FALSE	TRUE	5.03345e-06	MA0803.1_TBX15	MA0803.1	TBX15	PSP vs. CBD
561	2351	1431	3782	1529325	2.70057e-06	two.sided	0	FALSE	TRUE	5.69629e-06	MA0513.1_SMAD2::SMAD3::SMAD4	MA0513.1	SMAD2::SMAD3::SMAD4	PSP vs. Ctrl
562	2351	1431	3782	1834973	2.69369e-06	two.sided	0	FALSE	TRUE	5.69629e-06	MA0017.2_NR2F1	MA0017.2	NR2F1	PSP vs. Ctrl
563	2351	1431	3782	1529558	2.79665e-06	two.sided	0	FALSE	TRUE	5.86688e-06	MA0688.1_TBX2	MA0688.1	TBX2	PSP vs. Ctrl
564	2351	643	2994	845807	3.63247e-06	two.sided	0	FALSE	TRUE	5.94124e-06	MA0686.1_SPDEF	MA0686.1	SPDEF	CBD vs. Ctrl
565	2351	1431	3782	1834252	3.00097e-06	two.sided	0	FALSE	TRUE	6.26148e-06	MA0784.1_POU1F1	MA0784.1	POU1F1	PSP vs. Ctrl
566	2351	643	2994	845475	3.94457e-06	two.sided	0	FALSE	TRUE	6.42449e-06	MA0784.1_POU1F1	MA0784.1	POU1F1	CBD vs. Ctrl
567	2351	643	2994	845446	3.97302e-06	two.sided	0	FALSE	TRUE	6.44364e-06	MA0641.1_ELF4	MA0641.1	ELF4	CBD vs. Ctrl
568	643	1431	2074	519479	2.47591e-06	two.sided	0	FALSE	TRUE	6.59105e-06	MA0760.1_ERF	MA0760.1	ERF	PSP vs. CBD
569	2351	643	2994	666579	4.31306e-06	two.sided	0	FALSE	TRUE	6.96586e-06	MA0756.1_ONECUT2	MA0756.1	ONECUT2	CBD vs. Ctrl
570	643	1431	2074	519201	2.75802e-06	two.sided	0	FALSE	TRUE	7.29175e-06	MA0761.1_ETV1	MA0761.1	ETV1	PSP vs. CBD
571	643	1431	2074	519170	2.79132e-06	two.sided	0	FALSE	TRUE	7.3296e-06	MA0747.1_SP8	MA0747.1	SP8	PSP vs. CBD
572	643	1431	2074	519030	2.9466e-06	two.sided	0	FALSE	TRUE	7.68506e-06	MA0598.2_EHF	MA0598.2	EHF	PSP vs. CBD
573	643	1431	2074	518991	2.99131e-06	two.sided	0	FALSE	TRUE	7.74931e-06	MA0731.1_BCL6B	MA0731.1	BCL6B	PSP vs. CBD
574	643	1431	2074	518936	3.05547e-06	two.sided	0	FALSE	TRUE	7.81068e-06	MA0465.1_CDX2	MA0465.1	CDX2	PSP vs. CBD
575	643	1431	2074	518941	3.04959e-06	two.sided	0	FALSE	TRUE	7.81068e-06	MA0868.1_SOX8	MA0868.1	SOX8	PSP vs. CBD
576	643	1431	2074	518905	3.09222e-06	two.sided	0	FALSE	TRUE	7.85261e-06	MA0641.1_ELF4	MA0641.1	ELF4	PSP vs. CBD
577	643	1431	2074	518726	3.31281e-06	two.sided	0	FALSE	TRUE	8.35782e-06	MA0517.1_STAT1::STAT2	MA0517.1	STAT1::STAT2	PSP vs. CBD
578	2351	643	2994	844344	5.21233e-06	two.sided	0	FALSE	TRUE	8.38316e-06	MA0088.2_ZNF143	MA0088.2	ZNF143	CBD vs. Ctrl
579	2351	1431	3782	1532184	4.13296e-06	two.sided	0	FALSE	TRUE	8.577e-06	MA0802.1_TBR1	MA0802.1	TBR1	PSP vs. Ctrl
580	643	1431	2074	518385	3.77551e-06	two.sided	0	FALSE	TRUE	9.46328e-06	MA0464.2_BHLHE40	MA0464.2	BHLHE40	PSP vs. CBD
581	2351	643	2994	843740	6.04071e-06	two.sided	0	FALSE	TRUE	9.67516e-06	MA0777.1_MYBL2	MA0777.1	MYBL2	CBD vs. Ctrl
582	643	1431	2074	518217	4.02565e-06	two.sided	0	FALSE	TRUE	1.00252e-05	MA0076.2_ELK4	MA0076.2	ELK4	PSP vs. CBD
583	643	1431	2074	402020	4.18838e-06	two.sided	0	FALSE	TRUE	1.03635e-05	MA0043.2_HLF	MA0043.2	HLF	PSP vs. CBD
584	2351	643	2994	668304	6.5785e-06	two.sided	0	FALSE	TRUE	1.0493e-05	MA0646.1_GCM1	MA0646.1	GCM1	CBD vs. Ctrl
585	643	1431	2074	402115	4.34252e-06	two.sided	0	FALSE	TRUE	1.06765e-05	MA0132.2_PDX1	MA0132.2	PDX1	PSP vs. CBD
586	2351	1431	3782	1533772	5.21816e-06	two.sided	0	FALSE	TRUE	1.07712e-05	MA0778.1_NFKB2	MA0778.1	NFKB2	PSP vs. Ctrl
587	643	1431	2074	517796	4.72419e-06	two.sided	0	FALSE	TRUE	1.15414e-05	MA0640.1_ELF3	MA0640.1	ELF3	PSP vs. CBD
588	643	1431	2074	402645	5.30728e-06	two.sided	0	FALSE	TRUE	1.28843e-05	MA0902.1_HOXB2	MA0902.1	HOXB2	PSP vs. CBD
589	2351	643	2994	669392	8.55207e-06	two.sided	0	FALSE	TRUE	1.35848e-05	MA0731.1_BCL6B	MA0731.1	BCL6B	CBD vs. Ctrl
590	2351	1431	3782	1828174	7.32151e-06	two.sided	0	FALSE	TRUE	1.50325e-05	MA0507.1_POU2F2	MA0507.1	POU2F2	PSP vs. Ctrl
591	643	1431	2074	516850	6.74185e-06	two.sided	0	FALSE	TRUE	1.62647e-05	MA0136.2_ELF5	MA0136.2	ELF5	PSP vs. CBD
592	643	1431	2074	403328	6.85595e-06	two.sided	0	FALSE	TRUE	1.64372e-05	MA0113.3_NR3C1	MA0113.3	NR3C1	PSP vs. CBD
593	643	1431	2074	516778	6.92529e-06	two.sided	0	FALSE	TRUE	1.6501e-05	MA0873.1_HOXD12	MA0873.1	HOXD12	PSP vs. CBD
594	643	1431	2074	516760	6.97189e-06	two.sided	0	FALSE	TRUE	1.65101e-05	MA0795.1_SMAD3	MA0795.1	SMAD3	PSP vs. CBD
595	2351	643	2994	670370	1.07989e-05	two.sided	0	FALSE	TRUE	1.70835e-05	MA0794.1_PROX1	MA0794.1	PROX1	CBD vs. Ctrl
596	2351	1431	3782	1537806	9.33842e-06	two.sided	0	FALSE	TRUE	1.90721e-05	MA0465.1_CDX2	MA0465.1	CDX2	PSP vs. Ctrl
597	2351	1431	3782	1825976	1.00252e-05	two.sided	0	FALSE	TRUE	2.0367e-05	MA0865.1_E2F8	MA0865.1	E2F8	PSP vs. Ctrl
598	643	1431	2074	516076	8.9826e-06	two.sided	0	FALSE	TRUE	2.1142e-05	MA0765.1_ETV5	MA0765.1	ETV5	PSP vs. CBD
599	2351	1431	3782	1538922	1.09413e-05	two.sided	0	FALSE	TRUE	2.21117e-05	MA0727.1_NR3C2	MA0727.1	NR3C2	PSP vs. Ctrl
600	2351	1431	3782	1824390	1.2543e-05	two.sided	0	FALSE	TRUE	2.52167e-05	MA0724.1_VENTX	MA0724.1	VENTX	PSP vs. Ctrl
601	2351	1431	3782	1540481	1.36254e-05	two.sided	0	FALSE	TRUE	2.72509e-05	MA0596.1_SREBF2	MA0596.1	SREBF2	PSP vs. Ctrl
602	2351	1431	3782	1823515	1.41796e-05	two.sided	0	FALSE	TRUE	2.82131e-05	MA0895.1_HMBOX1	MA0895.1	HMBOX1	PSP vs. Ctrl
603	643	1431	2074	404947	1.24383e-05	two.sided	0	FALSE	TRUE	2.90981e-05	MA0894.1_HESX1	MA0894.1	HESX1	PSP vs. CBD
604	2351	1431	3782	1542231	1.73848e-05	two.sided	0	FALSE	TRUE	3.4413e-05	MA0508.1_PRDM1	MA0508.1	PRDM1	PSP vs. Ctrl
605	643	1431	2074	514391	1.65683e-05	two.sided	0	FALSE	TRUE	3.85263e-05	MA0800.1_EOMES	MA0800.1	EOMES	PSP vs. CBD
606	643	1431	2074	405815	1.7007e-05	two.sided	0	FALSE	TRUE	3.93097e-05	MA0888.1_EVX2	MA0888.1	EVX2	PSP vs. CBD
607	2351	1431	3782	1543306	2.0164e-05	two.sided	0	FALSE	TRUE	3.97107e-05	MA0685.1_SP4	MA0685.1	SP4	PSP vs. Ctrl
608	643	1431	2074	514219	1.76197e-05	two.sided	0	FALSE	TRUE	4.04835e-05	MA0685.1_SP4	MA0685.1	SP4	PSP vs. CBD
609	643	1431	2074	406103	1.88483e-05	two.sided	0	FALSE	TRUE	4.30501e-05	MA0618.1_LBX1	MA0618.1	LBX1	PSP vs. CBD
610	2351	1431	3782	1544052	2.2336e-05	two.sided	0	FALSE	TRUE	4.3765e-05	MA0808.1_TEAD3	MA0808.1	TEAD3	PSP vs. Ctrl
611	2351	1431	3782	1544294	2.30872e-05	two.sided	0	FALSE	TRUE	4.50085e-05	MA0667.1_MYF6	MA0667.1	MYF6	PSP vs. Ctrl
612	643	1431	2074	513855	2.00584e-05	two.sided	0	FALSE	TRUE	4.55443e-05	MA0764.1_ETV4	MA0764.1	ETV4	PSP vs. CBD
613	2351	643	2994	675126	3.24329e-05	two.sided	0	FALSE	TRUE	5.10983e-05	MA0823.1_HEY1	MA0823.1	HEY1	CBD vs. Ctrl
614	643	1431	2074	513496	2.2776e-05	two.sided	0	FALSE	TRUE	5.14126e-05	MA0471.1_E2F6	MA0471.1	E2F6	PSP vs. CBD
615	2351	1431	3782	1545963	2.89617e-05	two.sided	0	FALSE	TRUE	5.6177e-05	MA0775.1_MEIS3	MA0775.1	MEIS3	PSP vs. Ctrl
616	643	1431	2074	406916	2.51265e-05	two.sided	0	FALSE	TRUE	5.63885e-05	MA0900.1_HOXA2	MA0900.1	HOXA2	PSP vs. CBD
617	643	1431	2074	513187	2.53925e-05	two.sided	0	FALSE	TRUE	5.66562e-05	MA0730.1_RARA(var.2)	MA0730.1	RARA(var.2)	PSP vs. CBD
618	2351	643	2994	835971	3.70749e-05	two.sided	0	FALSE	TRUE	5.81744e-05	MA0758.1_E2F7	MA0758.1	E2F7	CBD vs. Ctrl
619	2351	1431	3782	1546284	3.02437e-05	two.sided	0	FALSE	TRUE	5.83703e-05	MA0113.3_NR3C1	MA0113.3	NR3C1	PSP vs. Ctrl
620	643	1431	2074	513081	2.63542e-05	two.sided	0	FALSE	TRUE	5.84639e-05	MA0442.1_SOX10	MA0442.1	SOX10	PSP vs. CBD
621	2351	1431	3782	1546396	3.07035e-05	two.sided	0	FALSE	TRUE	5.89629e-05	MA0691.1_TFAP4	MA0691.1	TFAP4	PSP vs. Ctrl
622	2351	643	2994	676073	4.00969e-05	two.sided	0	FALSE	TRUE	6.26615e-05	MA0804.1_TBX19	MA0804.1	TBX19	CBD vs. Ctrl
623	2351	1431	3782	1547043	3.34927e-05	two.sided	0	FALSE	TRUE	6.40009e-05	MA0863.1_MTF1	MA0863.1	MTF1	PSP vs. Ctrl
624	2351	1431	3782	1547298	3.46568e-05	two.sided	0	FALSE	TRUE	6.58992e-05	MA0735.1_GLIS1	MA0735.1	GLIS1	PSP vs. Ctrl
625	2351	1431	3782	1548033	3.8231e-05	two.sided	0	FALSE	TRUE	7.2339e-05	MA0083.3_SRF	MA0083.3	SRF	PSP vs. Ctrl
626	2351	1431	3782	1548289	3.9556e-05	two.sided	0	FALSE	TRUE	7.4481e-05	MA0036.2_GATA2	MA0036.2	GATA2	PSP vs. Ctrl
627	643	1431	2074	407802	3.42165e-05	two.sided	0	FALSE	TRUE	7.54718e-05	MA0890.1_GBX2	MA0890.1	GBX2	PSP vs. CBD
628	643	1431	2074	512302	3.45613e-05	two.sided	0	FALSE	TRUE	7.57993e-05	MA0528.1_ZNF263	MA0528.1	ZNF263	PSP vs. CBD
629	2351	1431	3782	1548471	4.05244e-05	two.sided	0	FALSE	TRUE	7.59341e-05	MA0766.1_GATA5	MA0766.1	GATA5	PSP vs. Ctrl
630	2351	1431	3782	1549004	4.34915e-05	two.sided	0	FALSE	TRUE	8.11001e-05	MA0817.1_BHLHE23	MA0817.1	BHLHE23	PSP vs. Ctrl
631	2351	1431	3782	1549149	4.43337e-05	two.sided	0	FALSE	TRUE	8.22731e-05	MA0906.1_HOXC12	MA0906.1	HOXC12	PSP vs. Ctrl
632	643	1431	2074	511946	3.90724e-05	two.sided	0	FALSE	TRUE	8.52088e-05	MA0741.1_KLF16	MA0741.1	KLF16	PSP vs. CBD
633	643	1431	2074	511920	3.94229e-05	two.sided	0	FALSE	TRUE	8.54901e-05	MA0738.1_HIC2	MA0738.1	HIC2	PSP vs. CBD
634	2351	1431	3782	1549560	4.68057e-05	two.sided	0	FALSE	TRUE	8.64449e-05	MA0800.1_EOMES	MA0800.1	EOMES	PSP vs. Ctrl
635	643	1431	2074	511442	4.64232e-05	two.sided	0	FALSE	TRUE	0.000100108	MA0698.1_ZBTB18	MA0698.1	ZBTB18	PSP vs. CBD
636	643	1431	2074	409004	5.16292e-05	two.sided	0	FALSE	TRUE	0.000110104	MA0722.1_VAX1	MA0722.1	VAX1	PSP vs. CBD
637	643	1431	2074	409004	5.16292e-05	two.sided	0	FALSE	TRUE	0.000110104	MA0723.1_VAX2	MA0723.1	VAX2	PSP vs. CBD
638	2351	1431	3782	1551627	6.13491e-05	two.sided	0	FALSE	TRUE	0.000112766	MA0665.1_MSC	MA0665.1	MSC	PSP vs. Ctrl
639	2351	1431	3782	1551715	6.20546e-05	two.sided	0	FALSE	TRUE	0.000113522	MA0037.2_GATA3	MA0037.2	GATA3	PSP vs. Ctrl
640	2351	1431	3782	1552081	6.50721e-05	two.sided	0	FALSE	TRUE	0.000117924	MA0669.1_NEUROG2	MA0669.1	NEUROG2	PSP vs. Ctrl
641	2351	1431	3782	1552074	6.50131e-05	two.sided	0	FALSE	TRUE	0.000117924	MA0812.1_TFAP2B(var.2)	MA0812.1	TFAP2B(var.2)	PSP vs. Ctrl
642	643	1431	2074	510895	5.58777e-05	two.sided	0	FALSE	TRUE	0.000118141	MA0753.1_ZNF740	MA0753.1	ZNF740	PSP vs. CBD
643	643	1431	2074	510888	5.60097e-05	two.sided	0	FALSE	TRUE	0.000118141	MA0779.1_PAX1	MA0779.1	PAX1	PSP vs. CBD
644	2351	1431	3782	1812090	6.60058e-05	two.sided	0	FALSE	TRUE	0.000119057	MA0502.1_NFYB	MA0502.1	NFYB	PSP vs. Ctrl
645	2351	1431	3782	1552398	6.77974e-05	two.sided	0	FALSE	TRUE	0.00012172	MA0796.1_TGIF1	MA0796.1	TGIF1	PSP vs. Ctrl
646	2351	643	2994	679171	7.89953e-05	two.sided	0	FALSE	TRUE	0.000122952	MA0743.1_SCRT1	MA0743.1	SCRT1	CBD vs. Ctrl
647	643	1431	2074	510752	5.86348e-05	two.sided	0	FALSE	TRUE	0.000123006	MA0156.2_FEV	MA0156.2	FEV	PSP vs. CBD
648	2351	1431	3782	1552785	7.12709e-05	two.sided	0	FALSE	TRUE	0.000127364	MA0767.1_GCM2	MA0767.1	GCM2	PSP vs. Ctrl
649	2351	643	2994	679971	9.37427e-05	two.sided	0	FALSE	TRUE	0.00014532	MA0821.1_HES5	MA0821.1	HES5	CBD vs. Ctrl
650	2351	643	2994	680149	9.73603e-05	two.sided	0	FALSE	TRUE	0.000150324	MA0767.1_GCM2	MA0767.1	GCM2	CBD vs. Ctrl
651	643	1431	2074	510053	7.40688e-05	two.sided	0	FALSE	TRUE	0.000154543	MA0802.1_TBR1	MA0802.1	TBR1	PSP vs. CBD
652	2351	643	2994	680632	0.000107852	two.sided	0	FALSE	TRUE	0.00016586	MA0506.1_NRF1	MA0506.1	NRF1	CBD vs. Ctrl
653	2351	1431	3782	1554953	9.40573e-05	two.sided	0	FALSE	TRUE	0.000167309	MA0872.1_TFAP2A(var.3)	MA0872.1	TFAP2A(var.3)	PSP vs. Ctrl
654	2351	643	2994	830752	0.000115115	two.sided	0	FALSE	TRUE	0.000176326	MA0785.1_POU2F1	MA0785.1	POU2F1	CBD vs. Ctrl
655	2351	1431	3782	1808708	0.000101744	two.sided	0	FALSE	TRUE	0.000180153	MA0649.1_HEY2	MA0649.1	HEY2	PSP vs. Ctrl
656	643	1431	2074	509549	8.75017e-05	two.sided	0	FALSE	TRUE	0.00018159	MA0080.4_SPI1	MA0080.4	SPI1	PSP vs. CBD
657	2351	643	2994	681179	0.00012102	two.sided	0	FALSE	TRUE	0.000184639	MA0738.1_HIC2	MA0738.1	HIC2	CBD vs. Ctrl
658	643	1431	2074	509217	9.75743e-05	two.sided	0	FALSE	TRUE	0.00020141	MA0772.1_IRF7	MA0772.1	IRF7	PSP vs. CBD
659	643	1431	2074	508994	0.000104944	two.sided	0	FALSE	TRUE	0.000215471	MA0081.1_SPIB	MA0081.1	SPIB	PSP vs. CBD
660	643	1431	2074	411174	0.000106148	two.sided	0	FALSE	TRUE	0.000216788	MA0903.1_HOXB3	MA0903.1	HOXB3	PSP vs. CBD
661	643	1431	2074	411236	0.000108311	two.sided	0	FALSE	TRUE	0.000220043	MA0718.1_RAX	MA0718.1	RAX	PSP vs. CBD
662	2351	643	2994	829282	0.000156436	two.sided	0	FALSE	TRUE	0.000237733	MA0724.1_VENTX	MA0724.1	VENTX	CBD vs. Ctrl
663	643	1431	2074	508500	0.000123183	two.sided	0	FALSE	TRUE	0.000248946	MA0822.1_HES7	MA0822.1	HES7	PSP vs. CBD
664	2351	643	2994	683051	0.000178481	two.sided	0	FALSE	TRUE	0.000270171	MA0692.1_TFEB	MA0692.1	TFEB	CBD vs. Ctrl
665	643	1431	2074	411949	0.000136376	two.sided	0	FALSE	TRUE	0.000274172	MA0072.1_RORA(var.2)	MA0072.1	RORA(var.2)	PSP vs. CBD
666	643	1431	2074	412085	0.000142453	two.sided	0	FALSE	TRUE	0.000284907	MA0914.1_ISL2	MA0914.1	ISL2	PSP vs. CBD
667	2351	1431	3782	1559428	0.000164547	two.sided	0	FALSE	TRUE	0.000290023	MA0810.1_TFAP2A(var.2)	MA0810.1	TFAP2A(var.2)	PSP vs. Ctrl
668	2351	1431	3782	1804793	0.000165765	two.sided	0	FALSE	TRUE	0.000290842	MA0789.1_POU3F4	MA0789.1	POU3F4	PSP vs. Ctrl
669	643	1431	2074	507835	0.000152488	two.sided	0	FALSE	TRUE	0.000303403	MA0475.2_FLI1	MA0475.2	FLI1	PSP vs. CBD
670	2351	1431	3782	1560778	0.000194105	two.sided	0	FALSE	TRUE	0.000339025	MA0091.1_TAL1::TCF3	MA0091.1	TAL1::TCF3	PSP vs. Ctrl
671	643	1431	2074	412769	0.000177087	two.sided	0	FALSE	TRUE	0.000350541	MA0658.1_LHX6	MA0658.1	LHX6	PSP vs. CBD
672	2351	1431	3782	1561519	0.000212381	two.sided	0	FALSE	TRUE	0.000369276	MA0744.1_SCRT2	MA0744.1	SCRT2	PSP vs. Ctrl
673	2351	1431	3782	1561937	0.000223392	two.sided	0	FALSE	TRUE	0.000386679	MA0498.2_MEIS1	MA0498.2	MEIS1	PSP vs. Ctrl
674	2351	1431	3782	1561982	0.000224609	two.sided	0	FALSE	TRUE	0.000387049	MA0776.1_MYBL1	MA0776.1	MYBL1	PSP vs. Ctrl
675	2351	643	2994	685307	0.000281745	two.sided	0	FALSE	TRUE	0.000424819	MA0766.1_GATA5	MA0766.1	GATA5	CBD vs. Ctrl
676	643	1431	2074	506643	0.000222076	two.sided	0	FALSE	TRUE	0.000437353	MA0474.2_ERG	MA0474.2	ERG	PSP vs. CBD
677	643	1431	2074	413697	0.000236853	two.sided	0	FALSE	TRUE	0.000464087	MA0882.1_DLX6	MA0882.1	DLX6	PSP vs. CBD
678	643	1431	2074	413825	0.000246447	two.sided	0	FALSE	TRUE	0.000480447	MA0612.1_EMX1	MA0612.1	EMX1	PSP vs. CBD
679	2351	643	2994	685962	0.000320909	two.sided	0	FALSE	TRUE	0.000481987	MA0757.1_ONECUT3	MA0757.1	ONECUT3	CBD vs. Ctrl
680	2351	643	2994	825218	0.00035508	two.sided	0	FALSE	TRUE	0.000531243	MA0645.1_ETV6	MA0645.1	ETV6	CBD vs. Ctrl
681	2351	643	2994	824949	0.00037433	two.sided	0	FALSE	TRUE	0.000557881	MA0163.1_PLAG1	MA0163.1	PLAG1	CBD vs. Ctrl
682	2351	643	2994	687280	0.00041563	two.sided	0	FALSE	TRUE	0.00061705	MA0119.1_NFIC::TLX1	MA0119.1	NFIC::TLX1	CBD vs. Ctrl
683	2351	643	2994	687516	0.000435131	two.sided	0	FALSE	TRUE	0.000643527	MA0752.1_ZNF410	MA0752.1	ZNF410	CBD vs. Ctrl
684	2351	643	2994	687570	0.000439712	two.sided	0	FALSE	TRUE	0.00064782	MA0867.1_SOX4	MA0867.1	SOX4	CBD vs. Ctrl
685	2351	643	2994	687975	0.000475529	two.sided	0	FALSE	TRUE	0.000697925	MA0884.1_DUXA	MA0884.1	DUXA	CBD vs. Ctrl
686	643	1431	2074	415090	0.000362974	two.sided	0	FALSE	TRUE	0.00070406	MA0642.1_EN2	MA0642.1	EN2	PSP vs. CBD
687	2351	1431	3782	1567461	0.000429342	two.sided	0	FALSE	TRUE	0.00073656	MA0610.1_DMRT3	MA0610.1	DMRT3	PSP vs. Ctrl
688	2351	1431	3782	1796174	0.000462609	two.sided	0	FALSE	TRUE	0.000783188	MA0018.2_CREB1	MA0018.2	CREB1	PSP vs. Ctrl
689	2351	1431	3782	1796241	0.00045905	two.sided	0	FALSE	TRUE	0.000783188	MA0504.1_NR2C2	MA0504.1	NR2C2	PSP vs. Ctrl
690	2351	1431	3782	1796194	0.000461544	two.sided	0	FALSE	TRUE	0.000783188	MA0855.1_RXRB	MA0855.1	RXRB	PSP vs. Ctrl
691	643	1431	2074	504611	0.000413384	two.sided	0	FALSE	TRUE	0.000797832	MA0825.1_MNT	MA0825.1	MNT	PSP vs. CBD
692	2351	1431	3782	1569060	0.000516098	two.sided	0	FALSE	TRUE	0.000869929	MA0845.1_FOXB1	MA0845.1	FOXB1	PSP vs. Ctrl
693	643	1431	2074	503889	0.000512476	two.sided	0	FALSE	TRUE	0.000984158	MA0688.1_TBX2	MA0688.1	TBX2	PSP vs. CBD
694	643	1431	2074	503491	0.000576159	two.sided	0	FALSE	TRUE	0.00110098	MA0775.1_MEIS3	MA0775.1	MEIS3	PSP vs. CBD
695	643	1431	2074	503459	0.000581587	two.sided	0	FALSE	TRUE	0.00110587	MA0878.1_CDX1	MA0878.1	CDX1	PSP vs. CBD
696	2351	643	2994	690681	0.000794043	two.sided	0	FALSE	TRUE	0.00116099	MA0669.1_NEUROG2	MA0669.1	NEUROG2	CBD vs. Ctrl
697	2351	1431	3782	1571737	0.000698777	two.sided	0	FALSE	TRUE	0.00117273	MA0813.1_TFAP2B(var.3)	MA0813.1	TFAP2B(var.3)	PSP vs. Ctrl
698	643	1431	2074	503104	0.000645081	two.sided	0	FALSE	TRUE	0.00122059	MA0756.1_ONECUT2	MA0756.1	ONECUT2	PSP vs. CBD
699	2351	1431	3782	1791984	0.000743909	two.sided	0	FALSE	TRUE	0.00124307	MA0158.1_HOXA5	MA0158.1	HOXA5	PSP vs. Ctrl
700	2351	1431	3782	1573362	0.000837299	two.sided	0	FALSE	TRUE	0.00139309	MA0774.1_MEIS2	MA0774.1	MEIS2	PSP vs. Ctrl
701	643	1431	2074	502196	0.000837994	two.sided	0	FALSE	TRUE	0.00157788	MA0018.2_CREB1	MA0018.2	CREB1	PSP vs. CBD
702	643	1431	2074	501694	0.000966392	two.sided	0	FALSE	TRUE	0.00181081	MA0671.1_NFIX	MA0671.1	NFIX	PSP vs. CBD
703	2351	1431	3782	1576553	0.0011862	two.sided	0	FALSE	TRUE	0.00196512	MA0818.1_BHLHE22	MA0818.1	BHLHE22	PSP vs. Ctrl
704	2351	643	2994	693851	0.00141456	two.sided	0	FALSE	TRUE	0.00206046	MA0737.1_GLIS3	MA0737.1	GLIS3	CBD vs. Ctrl
705	2351	1431	3782	1787004	0.00128215	two.sided	0	FALSE	TRUE	0.00211499	MA0777.1_MYBL2	MA0777.1	MYBL2	PSP vs. Ctrl
706	2351	1431	3782	1577584	0.00132495	two.sided	0	FALSE	TRUE	0.00217631	MA0835.1_BATF3	MA0835.1	BATF3	PSP vs. Ctrl
707	643	1431	2074	500545	0.00133178	two.sided	0	FALSE	TRUE	0.00248342	MA0667.1_MYF6	MA0667.1	MYF6	PSP vs. CBD
708	2351	1431	3782	1578872	0.00151931	two.sided	0	FALSE	TRUE	0.00248497	MA0746.1_SP3	MA0746.1	SP3	PSP vs. Ctrl
709	2351	1431	3782	1785098	0.00157002	two.sided	0	FALSE	TRUE	0.00255708	MA0163.1_PLAG1	MA0163.1	PLAG1	PSP vs. Ctrl
710	2351	1431	3782	1579311	0.00159134	two.sided	0	FALSE	TRUE	0.00258091	MA0516.1_SP2	MA0516.1	SP2	PSP vs. Ctrl
711	643	1431	2074	500193	0.00146699	two.sided	0	FALSE	TRUE	0.00270937	MA0806.1_TBX4	MA0806.1	TBX4	PSP vs. CBD
712	643	1431	2074	500193	0.00146699	two.sided	0	FALSE	TRUE	0.00270937	MA0807.1_TBX5	MA0807.1	TBX5	PSP vs. CBD
713	2351	1431	3782	1783582	0.00184026	two.sided	0	FALSE	TRUE	0.00297214	MA0730.1_RARA(var.2)	MA0730.1	RARA(var.2)	PSP vs. Ctrl
714	2351	1431	3782	1581057	0.00191003	two.sided	0	FALSE	TRUE	0.00307196	MA0140.2_GATA1::TAL1	MA0140.2	GATA1::TAL1	PSP vs. Ctrl
715	2351	1431	3782	1783081	0.00193857	two.sided	0	FALSE	TRUE	0.00310493	MA0856.1_RXRG	MA0856.1	RXRG	PSP vs. Ctrl
716	2351	1431	3782	1581396	0.00197832	two.sided	0	FALSE	TRUE	0.00315551	MA0646.1_GCM1	MA0646.1	GCM1	PSP vs. Ctrl
717	643	1431	2074	499572	0.00173677	two.sided	0	FALSE	TRUE	0.00319235	MA0141.3_ESRRB	MA0141.3	ESRRB	PSP vs. CBD
718	2351	643	2994	815262	0.00222197	two.sided	0	FALSE	TRUE	0.00322436	MA0907.1_HOXC13	MA0907.1	HOXC13	CBD vs. Ctrl
719	2351	643	2994	815162	0.00226046	two.sided	0	FALSE	TRUE	0.00326792	MA0155.1_INSM1	MA0155.1	INSM1	CBD vs. Ctrl
720	2351	643	2994	815114	0.00227914	two.sided	0	FALSE	TRUE	0.00328265	MA0030.1_FOXF2	MA0030.1	FOXF2	CBD vs. Ctrl
721	2351	643	2994	696735	0.00234086	two.sided	0	FALSE	TRUE	0.00335901	MA0753.1_ZNF740	MA0753.1	ZNF740	CBD vs. Ctrl
722	2351	643	2994	696779	0.00235855	two.sided	0	FALSE	TRUE	0.00337185	MA0037.2_GATA3	MA0037.2	GATA3	CBD vs. Ctrl
723	643	1431	2074	420929	0.00191745	two.sided	0	FALSE	TRUE	0.00349121	MA0725.1_VSX1	MA0725.1	VSX1	PSP vs. CBD
724	643	1431	2074	420929	0.00191745	two.sided	0	FALSE	TRUE	0.00349121	MA0726.1_VSX2	MA0726.1	VSX2	PSP vs. CBD
725	643	1431	2074	499163	0.00193862	two.sided	0	FALSE	TRUE	0.00351318	MA0711.1_OTX1	MA0711.1	OTX1	PSP vs. CBD
726	2351	643	2994	697260	0.00255999	two.sided	0	FALSE	TRUE	0.00364633	MA0901.1_HOXB13	MA0901.1	HOXB13	CBD vs. Ctrl
727	2351	643	2994	697792	0.00280103	two.sided	0	FALSE	TRUE	0.00397498	MA0070.1_PBX1	MA0070.1	PBX1	CBD vs. Ctrl
728	643	1431	2074	498583	0.00226191	two.sided	0	FALSE	TRUE	0.0040799	MA0884.1_DUXA	MA0884.1	DUXA	PSP vs. CBD
729	2351	643	2994	698580	0.00319628	two.sided	0	FALSE	TRUE	0.00451928	MA0818.1_BHLHE22	MA0818.1	BHLHE22	CBD vs. Ctrl
730	2351	1431	3782	1778649	0.00304265	two.sided	0	FALSE	TRUE	0.00483318	MA0758.1_E2F7	MA0758.1	E2F7	PSP vs. Ctrl
731	2351	1431	3782	1586107	0.00319	two.sided	0	FALSE	TRUE	0.00504647	MA0079.3_SP1	MA0079.3	SP1	PSP vs. Ctrl
732	2351	1431	3782	1586193	0.00321736	two.sided	0	FALSE	TRUE	0.00506899	MA0737.1_GLIS3	MA0737.1	GLIS3	PSP vs. Ctrl
733	2351	1431	3782	1586344	0.00326592	two.sided	0	FALSE	TRUE	0.00512458	MA0826.1_OLIG1	MA0826.1	OLIG1	PSP vs. Ctrl
734	2351	1431	3782	1777895	0.00327955	two.sided	0	FALSE	TRUE	0.00512512	MA0684.1_RUNX3	MA0684.1	RUNX3	PSP vs. Ctrl
735	643	1431	2074	497432	0.00305403	two.sided	0	FALSE	TRUE	0.00548305	MA0891.1_GSC2	MA0891.1	GSC2	PSP vs. CBD
736	2351	1431	3782	1587253	0.00357264	two.sided	0	FALSE	TRUE	0.00556063	MA0668.1_NEUROD2	MA0668.1	NEUROD2	PSP vs. Ctrl
737	643	1431	2074	497358	0.00311273	two.sided	0	FALSE	TRUE	0.00556256	MA0051.1_IRF2	MA0051.1	IRF2	PSP vs. CBD
738	2351	643	2994	811715	0.00402457	two.sided	0	FALSE	TRUE	0.00566965	MA0856.1_RXRG	MA0856.1	RXRG	CBD vs. Ctrl
739	2351	643	2994	811687	0.00404299	two.sided	0	FALSE	TRUE	0.00567489	MA0071.1_RORA	MA0071.1	RORA	CBD vs. Ctrl
740	2351	643	2994	700051	0.00407275	two.sided	0	FALSE	TRUE	0.00569595	MA0140.2_GATA1::TAL1	MA0140.2	GATA1::TAL1	CBD vs. Ctrl
741	2351	643	2994	811529	0.00414837	two.sided	0	FALSE	TRUE	0.00578076	MA0786.1_POU3F1	MA0786.1	POU3F1	CBD vs. Ctrl
742	2351	1431	3782	1587894	0.00380443	two.sided	0	FALSE	TRUE	0.00589763	MA0651.1_HOXC11	MA0651.1	HOXC11	PSP vs. Ctrl
743	2351	1431	3782	1776074	0.00392251	two.sided	0	FALSE	TRUE	0.00605636	MA0768.1_LEF1	MA0768.1	LEF1	PSP vs. Ctrl
744	643	1431	2074	496808	0.0035823	two.sided	0	FALSE	TRUE	0.00636071	MA0484.1_HNF4G	MA0484.1	HNF4G	PSP vs. CBD
745	643	1431	2074	496797	0.00359232	two.sided	0	FALSE	TRUE	0.00636071	MA0686.1_SPDEF	MA0686.1	SPDEF	PSP vs. CBD
746	2351	1431	3782	1775374	0.00419872	two.sided	0	FALSE	TRUE	0.006457	MA0825.1_MNT	MA0825.1	MNT	PSP vs. Ctrl
747	2351	1431	3782	1589095	0.00427585	two.sided	0	FALSE	TRUE	0.00654952	MA0833.1_ATF4	MA0833.1	ATF4	PSP vs. Ctrl
748	2351	643	2994	701032	0.00477301	two.sided	0	FALSE	TRUE	0.00662727	MA0814.1_TFAP2C(var.2)	MA0814.1	TFAP2C(var.2)	CBD vs. Ctrl
749	643	1431	2074	496386	0.00398532	two.sided	0	FALSE	TRUE	0.00702435	MA0774.1_MEIS2	MA0774.1	MEIS2	PSP vs. CBD
750	643	1431	2074	496292	0.00408052	two.sided	0	FALSE	TRUE	0.00715945	MA0905.1_HOXC10	MA0905.1	HOXC10	PSP vs. CBD
751	643	1431	2074	423883	0.00412372	two.sided	0	FALSE	TRUE	0.00720251	MA0507.1_POU2F2	MA0507.1	POU2F2	PSP vs. CBD
752	2351	643	2994	701825	0.00541682	two.sided	0	FALSE	TRUE	0.00749424	MA0154.3_EBF1	MA0154.3	EBF1	CBD vs. Ctrl
753	643	1431	2074	495854	0.00455189	two.sided	0	FALSE	TRUE	0.00791455	MA0105.4_NFKB1	MA0105.4	NFKB1	PSP vs. CBD
754	643	1431	2074	495751	0.00466967	two.sided	0	FALSE	TRUE	0.00808292	MA0778.1_NFKB2	MA0778.1	NFKB2	PSP vs. CBD
755	643	1431	2074	424412	0.00470449	two.sided	0	FALSE	TRUE	0.00810684	MA0628.1_POU6F1	MA0628.1	POU6F1	PSP vs. CBD
756	643	1431	2074	495649	0.00478902	two.sided	0	FALSE	TRUE	0.00821582	MA0697.1_ZIC3	MA0697.1	ZIC3	PSP vs. CBD
757	643	1431	2074	424842	0.00523006	two.sided	0	FALSE	TRUE	0.00893276	MA0776.1_MYBL1	MA0776.1	MYBL1	PSP vs. CBD
758	2351	643	2994	808681	0.00652757	two.sided	0	FALSE	TRUE	0.00899873	MA0865.1_E2F8	MA0865.1	E2F8	CBD vs. Ctrl
759	643	1431	2074	424955	0.00537671	two.sided	0	FALSE	TRUE	0.00914278	MA0613.1_FOXG1	MA0613.1	FOXG1	PSP vs. CBD
760	2351	643	2994	703352	0.00688146	two.sided	0	FALSE	TRUE	0.00945282	MA0138.2_REST	MA0138.2	REST	CBD vs. Ctrl
761	2351	1431	3782	1770367	0.00674687	two.sided	0	FALSE	TRUE	0.0102936	MA0788.1_POU3F3	MA0788.1	POU3F3	PSP vs. Ctrl
762	2351	643	2994	704022	0.00762966	two.sided	0	FALSE	TRUE	0.0104434	MA0003.3_TFAP2A	MA0003.3	TFAP2A	CBD vs. Ctrl
763	643	1431	2074	494540	0.00627655	two.sided	0	FALSE	TRUE	0.0106261	MA0077.1_SOX9	MA0077.1	SOX9	PSP vs. CBD
764	2351	643	2994	807249	0.00813756	two.sided	0	FALSE	TRUE	0.0110993	MA0792.1_POU5F1B	MA0792.1	POU5F1B	CBD vs. Ctrl
765	2351	643	2994	806989	0.00846536	two.sided	0	FALSE	TRUE	0.0115057	MA0672.1_NKX2-3	MA0672.1	NKX2-3	CBD vs. Ctrl
766	643	1431	2074	494092	0.00698715	two.sided	0	FALSE	TRUE	0.0117775	MA0651.1_HOXC11	MA0651.1	HOXC11	PSP vs. CBD
767	2351	1431	3782	1595836	0.00804752	two.sided	0	FALSE	TRUE	0.0122297	MA0804.1_TBX19	MA0804.1	TBX19	PSP vs. Ctrl
768	643	1431	2074	493784	0.00751676	two.sided	0	FALSE	TRUE	0.0126151	MA0610.1_DMRT3	MA0610.1	DMRT3	PSP vs. CBD
769	2351	643	2994	705485	0.00952217	two.sided	0	FALSE	TRUE	0.0128967	MA0817.1_BHLHE23	MA0817.1	BHLHE23	CBD vs. Ctrl
770	2351	643	2994	805967	0.00987124	two.sided	0	FALSE	TRUE	0.0133227	MA0671.1_NFIX	MA0671.1	NFIX	CBD vs. Ctrl
771	2351	643	2994	706390	0.0108927	two.sided	0	FALSE	TRUE	0.0146501	MA0657.1_KLF13	MA0657.1	KLF13	CBD vs. Ctrl
772	2351	1431	3782	1766183	0.00986254	two.sided	0	FALSE	TRUE	0.0148709	MA0025.1_NFIL3	MA0025.1	NFIL3	PSP vs. Ctrl
773	2351	1431	3782	1598059	0.00982838	two.sided	0	FALSE	TRUE	0.0148709	MA0488.1_JUN	MA0488.1	JUN	PSP vs. Ctrl
774	2351	1431	3782	1765727	0.0102698	two.sided	0	FALSE	TRUE	0.0154247	MA0785.1_POU2F1	MA0785.1	POU2F1	PSP vs. Ctrl
775	643	1431	2074	492824	0.00940609	two.sided	0	FALSE	TRUE	0.0157175	MA0821.1_HES5	MA0821.1	HES5	PSP vs. CBD
776	2351	643	2994	804536	0.0121886	two.sided	0	FALSE	TRUE	0.0163361	MA0469.2_E2F3	MA0469.2	E2F3	CBD vs. Ctrl
777	2351	643	2994	804406	0.0124213	two.sided	0	FALSE	TRUE	0.0165904	MA0790.1_POU4F1	MA0790.1	POU4F1	CBD vs. Ctrl
778	2351	1431	3782	1599763	0.011423	two.sided	0	FALSE	TRUE	0.0170902	MA0528.1_ZNF263	MA0528.1	ZNF263	PSP vs. Ctrl
779	2351	643	2994	707541	0.0128874	two.sided	0	FALSE	TRUE	0.0171535	MA0649.1_HEY2	MA0649.1	HEY2	CBD vs. Ctrl
780	2351	1431	3782	1764309	0.0116336	two.sided	0	FALSE	TRUE	0.0173381	MA0792.1_POU5F1B	MA0792.1	POU5F1B	PSP vs. Ctrl
781	643	1431	2074	427798	0.0105227	two.sided	0	FALSE	TRUE	0.0175075	MA0706.1_MEOX2	MA0706.1	MEOX2	PSP vs. CBD
782	2351	643	2994	803753	0.0136507	two.sided	0	FALSE	TRUE	0.0181072	MA0442.1_SOX10	MA0442.1	SOX10	CBD vs. Ctrl
783	2351	643	2994	708102	0.0139719	two.sided	0	FALSE	TRUE	0.0184697	MA0730.1_RARA(var.2)	MA0730.1	RARA(var.2)	CBD vs. Ctrl
784	2351	643	2994	708714	0.0152462	two.sided	0	FALSE	TRUE	0.0200854	MA0091.1_TAL1::TCF3	MA0091.1	TAL1::TCF3	CBD vs. Ctrl
785	2351	643	2994	802834	0.0155627	two.sided	0	FALSE	TRUE	0.0204327	MA0527.1_ZBTB33	MA0527.1	ZBTB33	CBD vs. Ctrl
786	643	1431	2074	491585	0.0124648	two.sided	0	FALSE	TRUE	0.0206499	MA0073.1_RREB1	MA0073.1	RREB1	PSP vs. CBD
787	2351	1431	3782	1602689	0.0147019	two.sided	0	FALSE	TRUE	0.0218267	MA0779.1_PAX1	MA0779.1	PAX1	PSP vs. Ctrl
788	2351	643	2994	802153	0.0171278	two.sided	0	FALSE	TRUE	0.0224113	MA0712.1_OTX2	MA0712.1	OTX2	CBD vs. Ctrl
789	2351	643	2994	709595	0.01726	two.sided	0	FALSE	TRUE	0.022508	MA0810.1_TFAP2A(var.2)	MA0810.1	TFAP2A(var.2)	CBD vs. Ctrl
790	2351	1431	3782	1760935	0.0155433	two.sided	0	FALSE	TRUE	0.0229229	MA0115.1_NR1H2::RXRA	MA0115.1	NR1H2::RXRA	PSP vs. Ctrl
791	2351	1431	3782	1760923	0.0155591	two.sided	0	FALSE	TRUE	0.0229229	MA0715.1_PROP1	MA0715.1	PROP1	PSP vs. Ctrl
792	2351	1431	3782	1603562	0.0158291	two.sided	0	FALSE	TRUE	0.023232	MA0647.1_GRHL1	MA0647.1	GRHL1	PSP vs. Ctrl
793	643	1431	2074	429359	0.0149161	two.sided	0	FALSE	TRUE	0.0246052	MA0680.1_PAX7	MA0680.1	PAX7	PSP vs. CBD
794	2351	643	2994	710353	0.0191757	two.sided	0	FALSE	TRUE	0.024922	MA0036.2_GATA2	MA0036.2	GATA2	CBD vs. Ctrl
795	643	1431	2074	490672	0.0152527	two.sided	0	FALSE	TRUE	0.0250533	MA0648.1_GSC	MA0648.1	GSC	PSP vs. CBD
796	643	1431	2074	429541	0.0155213	two.sided	0	FALSE	TRUE	0.0253866	MA0887.1_EVX1	MA0887.1	EVX1	PSP vs. CBD
797	643	1431	2074	490562	0.0156231	two.sided	0	FALSE	TRUE	0.0254453	MA0657.1_KLF13	MA0657.1	KLF13	PSP vs. CBD
798	643	1431	2074	490541	0.0156947	two.sided	0	FALSE	TRUE	0.0254545	MA0866.1_SOX21	MA0866.1	SOX21	PSP vs. CBD
799	2351	1431	3782	1759240	0.0179127	two.sided	0	FALSE	TRUE	0.0261905	MA0141.3_ESRRB	MA0141.3	ESRRB	PSP vs. Ctrl
800	643	1431	2074	490345	0.0163772	two.sided	0	FALSE	TRUE	0.0264502	MA0714.1_PITX3	MA0714.1	PITX3	PSP vs. CBD
801	2351	1431	3782	1758574	0.0189269	two.sided	0	FALSE	TRUE	0.0275689	MA0823.1_HEY1	MA0823.1	HEY1	PSP vs. Ctrl
802	2351	1431	3782	1757749	0.0202526	two.sided	0	FALSE	TRUE	0.0293891	MA0714.1_PITX3	MA0714.1	PITX3	PSP vs. Ctrl
803	643	1431	2074	489761	0.0185676	two.sided	0	FALSE	TRUE	0.0298629	MA0106.3_TP53	MA0106.3	TP53	PSP vs. CBD
804	2351	1431	3782	1606797	0.0206952	two.sided	0	FALSE	TRUE	0.029919	MA0687.1_SPIC	MA0687.1	SPIC	PSP vs. Ctrl
805	2351	1431	3782	1756215	0.022934	two.sided	0	FALSE	TRUE	0.0330318	MA0899.1_HOXA10	MA0899.1	HOXA10	PSP vs. Ctrl
806	2351	1431	3782	1756104	0.0231395	two.sided	0	FALSE	TRUE	0.0332039	MA0072.1_RORA(var.2)	MA0072.1	RORA(var.2)	PSP vs. Ctrl
807	2351	643	2994	712556	0.0258351	two.sided	0	FALSE	TRUE	0.0334643	MA0711.1_OTX1	MA0711.1	OTX1	CBD vs. Ctrl
808	2351	1431	3782	1608418	0.0235911	two.sided	0	FALSE	TRUE	0.0337265	MA0873.1_HOXD12	MA0873.1	HOXD12	PSP vs. Ctrl
809	2351	1431	3782	1608473	0.0236952	two.sided	0	FALSE	TRUE	0.0337504	MA0839.1_CREB3L1	MA0839.1	CREB3L1	PSP vs. Ctrl
810	643	1431	2074	489125	0.0212407	two.sided	0	FALSE	TRUE	0.0340203	MA0696.1_ZIC1	MA0696.1	ZIC1	PSP vs. CBD
811	2351	643	2994	798977	0.0263886	two.sided	0	FALSE	TRUE	0.0340669	MA0640.1_ELF3	MA0640.1	ELF3	CBD vs. Ctrl
812	643	1431	2074	489048	0.021586	two.sided	0	FALSE	TRUE	0.0344306	MA0523.1_TCF7L2	MA0523.1	TCF7L2	PSP vs. CBD
813	2351	1431	3782	1608956	0.024627	two.sided	0	FALSE	TRUE	0.0349486	MA0743.1_SCRT1	MA0743.1	SCRT1	PSP vs. Ctrl
814	643	1431	2074	488862	0.0224405	two.sided	0	FALSE	TRUE	0.0356462	MA0115.1_NR1H2::RXRA	MA0115.1	NR1H2::RXRA	PSP vs. CBD
815	2351	1431	3782	1754929	0.0254145	two.sided	0	FALSE	TRUE	0.035934	MA0786.1_POU3F1	MA0786.1	POU3F1	PSP vs. Ctrl
816	2351	643	2994	713312	0.0285416	two.sided	0	FALSE	TRUE	0.0367235	MA0749.1_ZBED1	MA0749.1	ZBED1	CBD vs. Ctrl
817	643	1431	2074	488414	0.0246201	two.sided	0	FALSE	TRUE	0.0389482	MA0504.1_NR2C2	MA0504.1	NR2C2	PSP vs. CBD
818	643	1431	2074	488346	0.0249665	two.sided	0	FALSE	TRUE	0.0393349	MA0752.1_ZNF410	MA0752.1	ZNF410	PSP vs. CBD
819	643	1431	2074	488220	0.0256195	two.sided	0	FALSE	TRUE	0.0401996	MA0855.1_RXRB	MA0855.1	RXRB	PSP vs. CBD
820	2351	643	2994	714372	0.0327456	two.sided	0	FALSE	TRUE	0.0419927	MA0815.1_TFAP2C(var.3)	MA0815.1	TFAP2C(var.3)	CBD vs. Ctrl
821	643	1431	2074	487945	0.0270961	two.sided	0	FALSE	TRUE	0.0423445	MA0525.2_TP63	MA0525.2	TP63	PSP vs. CBD
822	643	1431	2074	487815	0.0278194	two.sided	0	FALSE	TRUE	0.0432995	MA0684.1_RUNX3	MA0684.1	RUNX3	PSP vs. CBD
823	2351	643	2994	714639	0.0338845	two.sided	0	FALSE	TRUE	0.0433045	MA0523.1_TCF7L2	MA0523.1	TCF7L2	CBD vs. Ctrl
824	2351	643	2994	714664	0.0339929	two.sided	0	FALSE	TRUE	0.0433045	MA0058.3_MAX	MA0058.3	MAX	CBD vs. Ctrl
825	2351	1431	3782	1752494	0.0307514	two.sided	0	FALSE	TRUE	0.0433213	MA0648.1_GSC	MA0648.1	GSC	PSP vs. Ctrl
826	2351	643	2994	714950	0.0352537	two.sided	0	FALSE	TRUE	0.0447629	MA0153.2_HNF1B	MA0153.2	HNF1B	CBD vs. Ctrl
827	643	1431	2074	487398	0.0302528	two.sided	0	FALSE	TRUE	0.0467365	MA0158.1_HOXA5	MA0158.1	HOXA5	PSP vs. CBD
828	643	1431	2074	432837	0.0308751	two.sided	0	FALSE	TRUE	0.0467365	MA0042.2_FOXI1	MA0042.2	FOXI1	PSP vs. CBD
829	643	1431	2074	432837	0.0308751	two.sided	0	FALSE	TRUE	0.0467365	MA0033.2_FOXL1	MA0033.2	FOXL1	PSP vs. CBD
830	643	1431	2074	432837	0.0308751	two.sided	0	FALSE	TRUE	0.0467365	MA0847.1_FOXD2	MA0847.1	FOXD2	PSP vs. CBD
831	643	1431	2074	432837	0.0308751	two.sided	0	FALSE	TRUE	0.0467365	MA0848.1_FOXO4	MA0848.1	FOXO4	PSP vs. CBD
832	643	1431	2074	432837	0.0308751	two.sided	0	FALSE	TRUE	0.0467365	MA0849.1_FOXO6	MA0849.1	FOXO6	PSP vs. CBD
833	643	1431	2074	432837	0.0308751	two.sided	0	FALSE	TRUE	0.0467365	MA0850.1_FOXP3	MA0850.1	FOXP3	PSP vs. CBD
834	2351	1431	3782	1750975	0.0345467	two.sided	0	FALSE	TRUE	0.048491	MA0891.1_GSC2	MA0891.1	GSC2	PSP vs. Ctrl
835	643	1431	2074	433075	0.0323701	two.sided	0	FALSE	TRUE	0.0488081	MA0845.1_FOXB1	MA0845.1	FOXB1	PSP vs. CBD
836	643	1431	2074	487033	0.0325307	two.sided	0	FALSE	TRUE	0.0488593	MA0479.1_FOXH1	MA0479.1	FOXH1	PSP vs. CBD

## Sheet: T04
	obs.x	obs.y	obs.tot	statistic	pvalue	alternative	location.null	exact	corrected	adj.pvalue	TFM	prefix	TF	comparison
1	25276	15367	40643	191819545	0.0372959	two.sided	0	FALSE	TRUE	0.0470464	MA0101.1_REL	MA0101.1	REL	PSP vs. Ctrl
2	25276	15367	40643	198265759	0.000403712	two.sided	0	FALSE	TRUE	0.000633467	MA0496.1_MAFK	MA0496.1	MAFK	PSP vs. Ctrl
3	25276	15367	40643	199511880	3.76264e-06	two.sided	0	FALSE	TRUE	6.88331e-06	MA0654.1_ISX	MA0654.1	ISX	PSP vs. Ctrl
4	25276	15367	40643	199511880	3.76264e-06	two.sided	0	FALSE	TRUE	6.88331e-06	MA0701.1_LHX9	MA0701.1	LHX9	PSP vs. Ctrl
5	25276	15367	40643	199511880	3.76264e-06	two.sided	0	FALSE	TRUE	6.88331e-06	MA0717.1_RAX2	MA0717.1	RAX2	PSP vs. Ctrl
6	25276	15361	40637	197408955	0.0042697	two.sided	0	FALSE	TRUE	0.00592843	MA0777.1_MYBL2	MA0777.1	MYBL2	PSP vs. Ctrl
7	25276	15367	40643	199187978	1.41394e-05	two.sided	0	FALSE	TRUE	2.49215e-05	MA0791.1_POU4F3	MA0791.1	POU4F3	PSP vs. Ctrl
8	25276	15367	40643	188743540	1.89475e-06	two.sided	0	FALSE	TRUE	3.53321e-06	MA0813.1_TFAP2B(var.3)	MA0813.1	TFAP2B(var.3)	PSP vs. Ctrl
9	25276	15367	40643	197118273	0.0111742	two.sided	0	FALSE	TRUE	0.0150286	MA0899.1_HOXA10	MA0899.1	HOXA10	PSP vs. Ctrl
10	25276	4562	29838	59190449	0.00412659	two.sided	0	FALSE	TRUE	0.0050248	MA0634.1_ALX3	MA0634.1	ALX3	CBD vs. Ctrl
11	25276	4562	29838	58806832	0.0314049	two.sided	0	FALSE	TRUE	0.0361859	MA0027.2_EN1	MA0027.2	EN1	CBD vs. Ctrl
12	25276	4562	29838	56214472	0.0071582	two.sided	0	FALSE	TRUE	0.00850174	MA0822.1_HES7	MA0822.1	HES7	CBD vs. Ctrl
13	25276	4562	29838	58861999	0.0241377	two.sided	0	FALSE	TRUE	0.0279794	MA0842.1_NRL	MA0842.1	NRL	CBD vs. Ctrl
14	4562	15367	19929	35826275	0.0232829	two.sided	0	FALSE	TRUE	0.0300576	MA0066.1_PPARG	MA0066.1	PPARG	PSP vs. CBD

## Sheet: T05
10x Genomics™ sample indices used in scATAC-seq
Code	Index	Oligo 1	Oligo 2	Oligo 3	Oligo 4
114	SI-NA-A5	ATTGGGAA	CAGTCTGG	GGCATACT	TCACACTC
115	SI-NA-A6	ACGGGACT	CTTTCGAC	GAACATGA	TGCATCTG
102	SI-NA-A7	AGGTCATA	CTCATCAT	GCTGAGGG	TAACGTCC
105	SI-NA-A8	ATGATACG	CCACAGAA	GACTGTTC	TGTGCCGT
104	SI-NA-A9	ACAACTTG	CTCCAACA	GAGTGCGT	TGTGTGAC
108	SI-NA-A10	ACAGCAAC	CGCAATTT	GAGTTGCG	TTTCGCGA
112	SI-NA-A11	ACCAGTCC	CTTTCCTT	GGACAGGG	TAGGTAAA
113	SI-NA-A12	ACTACTGT	CGGGAACG	GACCTCTC	TTATGGAA
C1	#
C2	#
C3	#
C4	#
C5	#
